# Supplementary material for: Modulation of large rhythmic depolarizations in human large basket cells by norepinephrine and acetylcholine
Source: Commun Biol. 2024 Jul 20;7:885. doi: 10.1038/s42003-024-06546-2 (PMC11271271; doi:10.1038/s42003-024-06546-2)
Supplement: Supplementary file 4 — Supplementary Data1 [file 42003_2024_6546_MOESM4_ESM.xlsx]

## Sheet: Fig. 1d
		LRD Frequency (Hz)	normal EPSP frequency (Hz)	LRD amplitude (mV)	20%-80% rise time (ms)	normal EPSP amplitude (mV)	LRD decay (ms)	normal frequency decay (ms)
22072020 A	nFS	0.29	5.6	7.05	2.26	1.12	189.2	35.1
22072020 E	FS	0.16	11	14.9	1.75	1.64	215.1	36.9
26032021 A	nFS	0.7	21.4	17.1	3.14	1.86	150.8	25.9
26032021 B	FS	0.54	22	9	2.07	1.42	245.7	27.9
27042021 D	FS	0.31	10.6	10.81	1.38	1.21	97.3	29
27042021 E	FS	0.32	4.1	10.22	2.71	0.82	104.3	37.1
06072021 A	nFS	0.14	4.15	9.31	1.63	2.87	120.3	30.5
02082021 A	nFS	0.5	12.3	11.72	1.43	2.86	180.1	69.7
10032021 C	FS	0.11	2.95	4.46	1.13	1.49	149.1	69.9
01072021 B	FS	0.17	13.9	10.34	1.6	1.57	150.2	49.5
01072021 C	FS	0.5	10.02	10.66	-	1.85	161.6	33.4
01072021 D	nFS	0.26	7.92	10.37	1.89	4.06	109.3	44.6
02082021 G	FS	0.25	12.38	7.45	-	3.99	143.8	32.2
27082021 C	nFS	0.21	3.15	9.92	1.46	3.01	118.4	55.3
	Average	0.318571	10.105	10.2364	1.87083	2.12643	152.514	41.2143
	SD	0.176237	6.14363	3.10542	0.588163	1.04663	43.2596	14.6861
10122020 B	PC	0.38		4.23	2.02		236.7
10122020 D	PC	0.34		3.45	1.11		192
27072022 B	PC	0.4		4.33	1.74		199.7
27072022 C	PC	0.2		6.9	1.23		189.7
27072022 D	PC	0.55		6.41	1.21		186.4
	Average	0.374		5.064	1.462		200.9
	SD	0.125618		1.50183	0.396825		20.6033
		0.2888		0.000687994	0.16		0.01943
