# Supplementary material for: Modulation of large rhythmic depolarizations in human large basket cells by norepinephrine and acetylcholine
Source: Commun Biol. 2024 Jul 20;7:885. doi: 10.1038/s42003-024-06546-2 (PMC11271271; doi:10.1038/s42003-024-06546-2)
Supplement: Supplementary file 5 — Supplementary Data2 [file 42003_2024_6546_MOESM5_ESM.xlsx]

## Sheet: Fig. 2h
		EPSP frequency	EPSP amplitude (mV)
LRD+
22072020 A	nFS	5.7	1.12
22072020 E	FS	14.3	1.64
26032021 A	nFS	26.1	1.86
26032021 B	FS	25.2	1.42
27042021 D	FS	11.9	1.21
06072021 A	nFS	4.15	2.87
02082021 A	nFS	12.3	2.86
10032021 C	FS	2.5	1.49
27042021 E	FS	4.8	0.82
01072021 B	nFS	13.9	1.57
01072021 C	FS	10.01	1.85
01072021 D	nFS	7.92	4.06
02082021 G	FS	12.38	3.99
27082021 C	nFS	3.15	3.01
16122021 I	nFS
	Average	11.0221	2.12643
	SD	7.65024	0.92235
LRD-
22072020 C	nFS	1.32
22092020 B	nFS	2.84	0.84
24092020 A	FS	3.29	1.2
24092020 E	nFS	1.18	0.888
15102020 A	nFS	7.6	1.407
04112020 D	nFS	1.32	1.717
10122020 C	FS	2.44	1.9789
16122020 D	FS	5.44	2.138
08022021 B	FS	8.3	1.0957
08022021 C	FS	5.18	1.0043
26032021 E	nFS	1.08	1.58
06052021 A	nFS	3.6	1.16
06072021 C	FS	2.9	1.82
06072021 E	nFS	2.8	0.93
02082021 B	nFS	0.6	1.36
02082021 D	nFS	0.59	0.89
02082021 F	nFS	0.97	1.11
27082021 A	FS	0.7	2.82
	Average	2.89722	1.40817
	SD	2.35424	0.541618

## Sheet: Fig. 2j
LRD+ interneurons
	somatic Area (µm²)	total length of dendrites (µm)	total length pf axon (µm)	Nr. of dendrite	H-fieldspan of axon(µM)	V-fieldspan of axon (µm)	H-fieldspan of dendrite (µM)	V-fieldspan of dendrite (µM)
27082021 B qi	140.76	2899.18	39005.2	5	1257.82	1125.22	342.691	618.414
27042021 E	95.37	3997.51	42558.8	7	1111.08	984.49	506.985	517.897
27042021 D	168.26	4197.7	39238	9	818.392	677.351	537.389	576.922
26032021 B	161.92	3147.4	30587	6	1134.4	778.704	512.683	496.425
26032021 A	159.98	3814.31	35614.6	4	681.663	923.045	373.974	744.869
22072020 D	222.57	6660.94	52234	7	2021.76	1568.23	756.946	876.999
22072020 A	234.61	5095.57	53118.8	5	1622.07	1185.37	854.339	968.65
10032021 C	177.71	3556.82	33872.2	5	1173.2	817.71	484.523	418.788
Average	170.148	4171.18	40778.6	6	1227.55	1007.52	546.191	652.37
SD	44.0627	1210.38	8197.81	1.60357	427.271	284.089	176.062	193.78
LRD- interneurons
	somatic Area (µm²)	total length of dendrites (µm)	total length pf axon (µm)	Nr. of dendrite	H-fieldspan of axon(µM)	V-fieldspan of axon (µm)	H-fieldspan of dendrite (µM)	V-fieldspan of dendrite (µM)
27082021 A	131.91	312.09	15923.6	4	796.964	920.163	130.261	140.777
26032021 E	216.11	1528.74	6725.66	2	367.88	688.241	162.908	403.85
24092020 A	228.45	608.47	16373.9	3	341.129	1598.88	78.0552	119.855
22072020 C	281.41	3673.86	19860.8	-	1080.67	991.86	274.293	167.044
15102021 D	61.15	1649.52	7757.83	5	293.587	262.633	189.308	222.374
06052021 D	262.35	2175.55	14213.2	5	1168.08	864.701	366.054	382.796
04112020 D	106.69	1381.93	6544.81	3	179.584	688.417	153.074	252.337
16122020 CD	201.68	5310.27		5			342.515	777.648
Average	186.219	2080.05	12485.7	3.85714	603.985	859.271	212.059	308.335
SD	84.0799	1105.04	5402.76	1.21499	404.964	404.713	103.969	216.799
