# Supplementary material for: Modulation of large rhythmic depolarizations in human large basket cells by norepinephrine and acetylcholine
Source: Commun Biol. 2024 Jul 20;7:885. doi: 10.1038/s42003-024-06546-2 (PMC11271271; doi:10.1038/s42003-024-06546-2)
Supplement: Supplementary file 6 — Supplementary Data3 [file 42003_2024_6546_MOESM6_ESM.xlsx]

## Sheet: Fig. 3b
	LRD+
		ctrl	NE 30µM	Vm change
22072020 A	nFS	-72.51	-71.98	0.53
22072020 E	FS	-74.17	-69.69	4.48
10032021 C	FS	-68.29	-67.37	0.92
26032021 A	nFS	-59.42	-66.81	-7.39
26032021 B	FS	-71.58	-67.65	3.93
27042021 D	FS	-63.2	-61.96	1.24
27042021 E	FS	-68.77	-65.86	2.91
02082021 A	nFS	-64.16	-63.37	0.79
01072021 D	nFS	-68.67	-70.22	-1.55
01072021 C	FS	-73.21	-68.34	4.87
27082021 C	nFS	-69.97	-70.86	-0.89
		-68.5409	-67.6464	0.894545
		4.59956	3.08185	3.46401
	LRD-
		ctrl	NE 30µM	Vm change
22072020 C	nFS	-65.41	-59.97	5.44
24092020 A	FS	-65.99	-68.04	-2.05
24092020 E	nFS	-73.24	-71.27	1.97
10032021 H	nFS	-59.4	-59.89	-0.49
10032021 I	FS	-56.11	-57.42	-1.31
04112020 D	nFS	-71.53	-71.93	-0.4
08022021 B	FS	-73.66	-74.61	-0.95
08022021 C	FS	-69	-69.84	-0.84
26032021 E	nFS	-64.28	-64.5	-0.22
02082021 B	nFS	-69.26	-68.44	0.82
02082021 D	nFS	-67.8	-64.76	3.04
02082021 F	nFS	-65.52	-63.33	2.19
27082021 A	FS	-66.43	-70.08	-3.65
		-66.7408	-66.4677	0.273077
		5.02081	5.27541	2.38944

## Sheet: Fig. 3e
inter event interval (s)	ctrl			NE			amplitude (V)	ctrl			NE
n=9	EPSP	LRD		EPSP	LRD			EPSP	LRD		EPSP	LRD
	0.163382	5.46103		0.0463462	3.32686			0.0008948	0.00327877		0.00305764	0.00371068
	0.134606	9.0421		0.364096	2.38868			0.000959225	0.00349014		0.000966199	0.00294507
	0.49346	3.0069		0.132516	8.24156			0.000985093	0.00669309		0.00411807	0.0044786
	0.253192	5.0051		0.039282	2.0862			0.00166567	0.00581828		0.00231352	0.0035062
	0.25527	7.5843		0.576447	3.0697			0.000947803	0.0062561		0.00331599	0.00332168
	0.21098	9.8652		0.1691	3.4826			0.00132589	0.00334519		0.000980146	0.00238587
	0.13123	5.1985		0.04907	2.9273			0.00120159	0.00330471		0.00135303	0.00338449
	0.13549	3.0235		0.27227	1.8764			0.00173923	0.00594111		0.0011794	0.00241565
	0.10736	7.7558		0.12261	4.7473			0.00115872	0.00628574		0.00331903	0.00377431
	0.64123	3.8302		0.23331	3.8661			0.00124636	0.00650708		0.00252342	0.0031133
	0.04948	7.1		0.16202	6.0401			0.00195548	0.00607768		0.00136723	0.00524863
	0.24647	3.5597		0.22558	8.3075			0.0010518	0.0075525		0.00206911	0.00285979
	0.00888	10.1107		0.10334	3.3896			0.00143166	0.00332258		0.000941336	0.00631875
	0.24363	9.7236		0.01826	2.8255			0.000929408	0.00540037		0.000918761	0.00208185
	0.22926	5.1799		0.08276	4.5319			0.000850022	0.00326212		0.00209512	0.00314984
	0.21826	3.48624		0.29277	1.1006			0.000794724	0.00421123		0.00189955	0.00212278
	0.05434	6.94568		0.10116	7.5235			0.00188889	0.003952		0.00105688	0.00598262
	0.22688	12.5119		0.08676	2.8368			0.00086499	0.00348048		0.00154466	0.00224188
	0.04647	4.3998		0.01467	5.1867			0.00126819	0.00754088		0.00147428	0.00222833
	0.23269	16.1067		0.54642	5.786			0.00108428	0.00729127		0.00124979	0.00441136
	0.01206	3.4108		0.11505	1.8161			0.00102378	0.0131827		0.00119209	0.00408503
	0.58325	13.3237		0.08915	3.4299			0.000710629	0.00615352		0.00110876	0.0028456
	0.03343	3.9027		0.02642	3.2566			0.000939056	0.00451963		0.00168951	0.00377447
	0.11187	2.5959		0.60517	5.3584			0.000810824	0.0071391		0.00534642	0.00299288
	0.09967	6.5862		0.03156	2.897			0.00135227	0.00426558		0.0036441	0.00336513
	0.38379	4.8672		0.48326	2.651			0.00127059	0.00747338		0.0053165	0.00761334
	0.04387	8.6445		0.02018	2.894			0.00095313	0.00652332		0.0028277	0.00690676
	0.0798	5.5733		0.04035	3.019			0.00159845	0.00630062		0.00170689	0.00433775
	0.04972	4.99224		0.12685	2.151			0.00255983	0.0047086		0.00189168	0.00986239
	0.56777	2.86187		0.20288	2.932			0.00294197	0.00418953		0.00159199	0.00477422
	0.01001	0.53659		0.07435	3.047			0.00217756	0.00560722		0.00174037	0.00384267
	0.1736	5.58206		0.17154	2.496			0.00154442	0.00897948		0.00135735	0.00629555
	0.13018	2.8779		0.23619	4.891			0.00164576	0.00451944		0.00115885	0.00753178
	0.12626	1.4573		0.03559	4.026			0.000955164	0.00460349		0.000959344	0.00522503
	0.22645	2.2387		0.16892	1.511			0.00148975	0.00826417		0.00146667	0.00679665
	0.25302	1.1286		0.02607	3.85			0.00108643	0.00519133		0.00117762	0.00916952
	0.27378	0.7275		0.04702	1.962			0.00140021	0.00866943		0.00177715	0.0105198
	0.03895	2.2839		0.09544	5.53			0.000844948	0.00391844		0.00098116	0.00872836
	0.22307	0.3526		0.08875	4.285			0.00182826	0.00848819		0.00170968	0.00314128
	0.24464	1.5304		0.14662	2.063			0.0010603	0.00598596		0.00258342	0.0100147
	0.0796	4.6559		0.44412	1.651			0.00100805	0.00565121		0.00168748	0.00910191
	0.08521	8.6183		0.05333	1.627			0.00110711	0.00709796		0.00193746	0.00388211
	0.07463	1.4989		0.11695	2.91			0.00116087	0.00638098		0.000923581	0.00797704
	0.16613	2.9692		0.03077	1.401			0.00149368	0.00850921		0.00099574	0.00967436
	0.04392	3.0164		0.12193	2.944			0.00104585	0.00722317		0.00102581	0.00698711
	0.08972	1.9468		0.4676	1.62			0.00147961	0.00556161		0.00103848	0.00699163
	0.03056	0.4737		0.1464	4.699			0.00101996	0.00497287		0.00111954	0.00307298
	0.03895	2.15943		0.08761	2.244			0.00139792	0.00704829		0.00204388	0.00469896
	0.02059	3.03358		0.25528	1.036			0.00102974	0.0097761		0.000913434	0.00867641
	0.27274	1.00569		0.02494	3.188			0.00110609	0.00918192		0.00110622	0.00872612
	0.15292	5.06346		0.18926	4.342			0.00161887	0.00538646		0.00158525	0.0047487
	0.66913	2.3643		0.16216	3.473			0.00115734	0.0074695		0.00123672	0.00588299
	0.13456	3.5047		0.02709	4.663			0.000922434	0.00762153		0.00159287	0.0094729
	0.18252	1.3995		0.16513	1.678			0.00148875	0.00917354		0.00152679	0.00512532
	0.35259	1.8744		0.17066	4.351			0.0010329	0.0084413		0.00167632	0.00334838
	0.0698	1.1023		0.17369	1.941			0.0013335	0.00866242		0.001325	0.00540837
	0.0579	0.4784		0.02786	3.309			0.00232316	0.00781321		0.00164195	0.00461446
	0.0727	1.6171		0.1881	45.35			0.00138004	0.00634255		0.00183397	0.00566942
	0.1118	2.2387		0.03976	6.968			0.00169103	0.0061003		0.00124852	0.00803499
	0.1429	0.8281		0.13798	5.992			0.00183284	0.00563391		0.00119601	0.00237563
	0.324	2.6938		0.04214	1.339			0.00110254	0.00521351		0.00138473	0.00288003
	0.0007	2.9713		0.39806	8.175			0.000942104	0.00663156		0.000890858	0.00233217
	0.0489	0.4844		0.0427	8.723			0.00180544	0.00301877		0.000925988	0.00266334
	0.0689	3.6774		0.6251	7.378			0.00217337	0.00775075		0.00159071	0.00205862
	0.2745	0.9614		0.165	1.897			0.00170194	0.00409365		0.00314464	0.00224423
	0.0867	1.1375		0.0603	2.33			0.00463998	0.00377151		0.00150459	0.0033353
	0.0271	2.7613		0.0663	5.164			0.00264289	0.00538749		0.00129989	0.0020516
	0.1622	0.9875		0.0095	0.8193			0.00137104	0.00557875		0.00104167	0.00204483
	0.4684	2.5815		0.02	1.9434			0.00134885	0.00383699		0.00294273	0.00422405
	0.1139	3.09503		0.0467	0.8612			0.00109695	0.00656372		0.00273193	0.00305159
	0.2701	1.03501		0.0219	0.728			0.00172743	0.00402515		0.00222031	0.00624317
	0.4325	1.98252		0.3289	2.2895			0.00134657	0.00891012		0.00202738	0.00700035
	0.2576	3.21207		0.7495	0.3993			0.00164957	0.0054652		0.00104305	0.0048127
	0.3268	3.4532		0.5007	0.8873			0.000869811	0.00629044		0.0010811	0.00860295
	0.1547	3.7272		0.0234	1.2283			0.00101148	0.00521077		0.00183295	0.00790238
	0.3435	2.0212		0.0166	0.8845			0.00142837	0.00751175		0.000927135	0.00630532
	0.0931	1.0058		0.0507	1.4617			0.0011298	0.00744163		0.00111535	0.00387601
	0.0213	9.4729		0.0754	0.6956			0.0017216	0.0317247		0.00132462	0.00839155
	0.0113	0.5316		0.2843	1.0428			0.00168204	0.00590033		0.00309443	0.00566507
	0.1456	10.1011		0.0241	0.8112			0.00130763	0.012966		0.002892	0.0124325
	0.4852	4.4446		0.2406	1.1825			0.00109836	0.0039543		0.00259711	0.00765726
	0.0899	1.7896		0.04	1.6766			0.000974566	0.0307083		0.00202968	0.00699127
	0.1051	4.729		0.0759	1.417			0.00178806	0.0324089		0.00113361	0.00678814
	0.2269	11.421		0.0003	1.8231			0.00149343	0.006779		0.00121466	0.00876697
	0.1122	4.935		0.0578	0.5665			0.00104001	0.0339986		0.00113513	0.00581576
	0.0845	5.2862		0.1148	1.8647			0.000868529	0.0180903		0.00157155	0.0104322
	0.1319	9.8894		0.2019	1.6805			0.00143027	0.035472		0.00349926	0.00939886
	0.0907	2.0769		0.5296	1.2837			0.00121669	0.0326783		0.00109518	0.0101988
	0.2171	4.5391		1.1288	0.5535			0.00135887	0.0102657		0.000810191	0.00572299
	0.0231	1.0965		0.3932	1.0462			0.000916228	0.00767466		0.00123686	0.0035607
	0.0268	1.2193		0.4023	0.5879			0.00133882	0.00436122		0.00164398	0.00536238
	0.0929	3.6331		0.0333	1.4466			0.00221371	0.00732043		0.00172921	0.00331552
	0.1158	5.4362		0.1047	0.4948			0.000915579	0.0229603		0.00135417	0.0131557
	0.3832	1.1881		0.2124	0.6314			0.00138208	0.00693151		0.0011964	0.00656325
	0.5707	11.1114		0.3424	1.5994			0.00115353	0.00390345		0.00104014	0.00417787
	0.0525	1.317		0.0612	0.9805			0.00109963	0.0222905		0.00112473	0.00416896
	0.3928	3.0503		0.3172	1.5214			0.00129633	0.0351495		0.00288286	0.00487993
	0.4315	3.5612		0.1285	1.5423			0.00133249	0.00901758		0.00106944	0.00858548
	0.3112	3.2878		0.0778	1.7318			0.00198262	0.0151838		0.00489669	0.00818374
	0.2411	1.2232		0.0433	1.4222			0.000977106	0.00676777		0.00233914	0.00537458
	0.1497	3.2999		0.0343	1.0491			0.00129887	0.00434765		0.00122873	0.00583462
	0.2913	0.9087		0.0628	1.6525			0.00138461	0.00405757		0.00176638	0.00895353
	0.3619	3.8031		0.0368	1.0293			0.00127959	0.00416173		0.00140237	0.0045938
	0.0826	0.9004		0.2407	0.3317			0.00174912	0.00924623		0.00479294	0.00898142
	0.0743	1.0185		0.1372	1.3614			0.00214128	0.0139052		0.0014011	0.00912032
	0.1114	3.8151		1.0036	1.4694			0.00119539	0.00989603		0.00192174	0.00889792
	0.0818	3.232		0.0268	0.88			0.00127973	0.0156953		0.00183804	0.00679774
	0.0921	4.0085		0.1441	1.0098			0.000782676	0.0128107		0.000899486	0.00612208
	0.2097	4.8995		0.0837	1.057			0.000995748	0.00437452		0.00119792	0.0103332
	0.1811	8.9193		0.0662	1.13013			0.000931822	0.0122371		0.00095135	0.0128888
	0.0646	4.8872		0.0677	0.52041			0.00130965	0.00449692		0.00180595	0.00872806
	0.1867	8.7066		0.0464	1.05275			0.000961758	0.00530092		0.0011709	0.00501607
	0.687			0.1642	1.62392			0.00477391	0.00493099		0.00146692	0.00681493
	0.3173			0.2843	1.03564			0.00392237	0.00585579		0.00105041	0.00408264
	0.192			0.0489	2.42929			0.00387482	0.00713392		0.001577	0.0380319
	0.0124			1.034	0.76594			0.00123864	0.00617108		0.00193125	0.00548943
	0.2065			0.1821	0.75862			0.00127935	0.0107246		0.00126057	0.0071239
	0.3035			0.0403	0.7768			0.000837721	0.00640105		0.00286384	0.00358585
	0.0303			0.0126	1.3128			0.00154594			0.00259774	0.00938271
	0.3735			0.1926	1.29			0.00113082			0.00127072	0.00546842
	0.044			0.0101	1.2534			0.000867009			0.00164233	0.0147728
	0.3447			0.013	0.6843			0.000982806			0.00281755	0.00318645
	0.2795			0.4948	2.3708			0.00353325			0.00151791	0.00606374
	0.6365			0.0856	1.7563			0.00208155			0.0017013	0.00734854
	0.0394			0.0724	0.63			0.0018601			0.00296709	0.00636392
	0.0191			0.204	0.9438			0.0011156			0.00235055	0.00543632
	0.0201			0.0198	1.1109			0.00120832			0.00114934	0.00383657
	0.0197			0.2454	2.751			0.00141378			0.0019655	0.00526964
	0.0205			0.0236	1.2882			0.0016053			0.00129735	0.00477838
	0.0567			0.0717	1.3194			0.00168101			0.00117521	0.00401825
	0.1575			0.2984	1.7903			0.00226557			0.000988521	0.0385943
	0.2644			0.2798	1.2741			0.00182154			0.00150345	0.0056929
	0.3379			0.1303	0.8787			0.0017774			0.00133261	0.00343528
	0.1648			0.6906	1.5317			0.00180227			0.00148608	0.0033649
	0.2362			0.1487	0.6332			0.00119995			0.00124941	0.00589456
	0.1503			0.1743	2.7745			0.00133134			0.00211883	0.00503654
	0.2739			0.1496	0.8009			0.00212264			0.00109049	0.00826053
	0.2051			1.0022	1.4191			0.00195548			0.00121022	0.00453248
	0.2338			0.0155	1.3224			0.00125131			0.00446229	0.00723856
	0.0498			0.2675	2.0664			0.00166453			0.000894152	0.00353428
	0.4072			0.069	1.7625			0.00116696			0.00254042	0.00375163
	0.7865			0.5441	1.9273			0.00120958			0.000870563	0.00485254
	0.138			0.0585	1.8165			0.000906333			0.00101515	0.00869861
	0.1476			0.0522	1.3109			0.00326336			0.00113399	0.0044189
	0.109			0.5451	6.524			0.00122911			0.00190017	0.0037851
	0.0575			0.3523	2.888			0.00159591			0.00189777	0.00334434
	0.3189			0.2276	1.51			0.00173403			0.00108694	0.00412304
	0.0303			0.0132	1.45			0.00143458			0.000920027	0.00523392
	0.115			0.0834	2.678			0.00131701			0.00387304	0.00375093
	0.3498			0.2317	2.941			0.00172313			0.00158678	0.0066524
	0.0605			0.2361	2.561			0.00125689			0.00104381	0.0051197
	0.1915			0.2394	1.131			0.00158665			0.00141937	0.00878256
	0.1075			0.0267	2.863			0.0010617			0.00102721	0.00404982
	0.4816			0.4154	3.218			0.0028367			0.000941843	0.00452748
	0.061			0.1886	2.799			0.00158069			0.00127604	0.00549439
	0.0296			0.2212	1.629			0.00454257			0.000830479	0.00366402
	0.0581			0.3114	1.441			0.00122645			0.0042501	0.00810013
	0.0719			0.0202	2.035			0.000906713			0.00121821	0.00392887
	0.1754			0.023	0.701			0.000716209			0.000781149	0.0045759
	0.4356			0.0208	1.412			0.000914961			0.00209639	0.00437302
	0.2941			0.1918	3.039			0.00114439			0.001845	0.0119598
	0.1706			0.046	1.603			0.000890471			0.0016181	0.00401523
	0.0324			0.0659	0.346			0.0022491			0.00121643	0.00426872
	0.189			0.7055	2.254			0.000928789			0.00194939	0.00405375
	0.0554			0.3032	1.247			0.00171069			0.00105003	0.0368242
	0.4239			0.2872	1.637			0.00104509			0.00191223	0.00312934
	0.2959			0.0286	1.242			0.00217693			0.00189282	0.00363516
	0.222			0.0321	1.13			0.000837453			0.00144461	0.00351715
	0.0938			0.2433	2.366			0.00160111			0.0015519	0.0174399
	0.0565			0.0926	1.759			0.000999928			0.00133603	0.00689111
	0.2176			0.1079	2.779			0.000922307			0.00100018	0.0331161
	0.0592			0.0707	0.977			0.00246572			0.00173543	0.00351327
	0.1339			0.4698	0.58			0.00150205			0.00163054	0.00946836
	0.0169			0.1425	0.957			0.000998281			0.000989921	0.00467506
	0.0772			0.3576	1.329			0.00162254			0.00240991	0.00484002
	0.0252			0.3277	1.704			0.00123761			0.00104889	0.0176292
	0.4897			0.3199	0.943			0.00116355			0.00134606	0.00446971
	0.0557			0.146	1.076			0.00140617			0.000916727	0.00916959
	0.2932			0.014	1.411			0.000938162			0.00298814	0.00739267
	0.0958			0.3591	1.502			0.00180557			0.00125068	0.0344042
	0.384			0.6222	3.261			0.00125423			0.0016105	0.0333372
	0.5057			0.0274	2.029			0.0020506			0.00160111	0.00741392
	0.0146			0.7741	1.352			0.0011704			0.000885278	0.00467452
	0.0292			0.0669	3.815			0.00157207			0.00157358	0.00511923
	0.209			0.0577	0.818			0.00160022			0.0014063	0.00787041
	0.5054			0.0231	1.511			0.001559			0.00124915	0.00422283
	0.2723			0.8182	0.66			0.00105777			0.000963658	0.00579299
	0.2038			0.0241	1.454			0.00142138			0.00116938	0.0123515
	0.0484			0.2096	1.995			0.00127566			0.000919782	0.0124266
	0.1139			0.4042	1.136			0.00157346			0.00102479	0.00369937
	0.8213			0.3456	0.481			0.00126754			0.00125346	0.0172672
	0.1684			0.1987	1.044			0.00225949			0.00127224	0.0310787
	0.4582			0.4363	3.178			0.00217464			0.0012153	0.0320327
	0.0839			0.2762	3.103			0.000821099			0.000836954	0.0317792
	0.243			0.263	1.028			0.00106893			0.00135569	0.00546669
	0.0667			0.1378	0.83			0.0012612			0.00126247	0.00360765
	0.3254			0.1719	3.228			0.00384729			0.00370727	0.00345911
	0.0836			0.2615	5.021			0.0010976			0.00223082	0.00552039
	0.0904			0.245	3.894			0.000910386			0.00130952	0.00846135
	0.5237			0.2678	4.28			0.00112258			0.00135569	0.00949118
	0.3337			0.3507	1.241			0.00157131			0.00113083	0.0321353
	0.177			0.094	3.025			0.00142723			0.00179351	0.00577871
	0.3087			0.4942	8.125			0.00189663			0.00172275	0.00433096
	0.2041			0.1288	1.655			0.0011359			0.00152932	0.0225868
	0.5157			0.1392	2.168			0.0009856			0.00226305	0.00524459
	0.0588			0.0291	1.181			0.000893399			0.00165768	0.00978567
	0.0866			0.4479	3.906			0.00217666			0.00130458	0.00661121
	0.2936			0.056	2.248			0.0009856			0.00145677	0.00611332
	0.4873			0.2311	3.65			0.00123736			0.0018166	0.00550797
	0.0808			0.3652	1.909			0.00166351			0.0018114	0.00555915
	0.0548			0.2259	1.086			0.00180252			0.00103316	0.00532059
	0.1574			0.3014	3.884			0.00083454			0.00172503	0.00422029
	0.2069			0.0178	1.181			0.00190019			0.00173657	0.0058169
	0.0292			0.5597	1.691			0.00228308			0.00132196	0.00635656
	0.1646			0.7615	1.674			0.00226139			0.00122785	0.00500361
	0.0517			0.0107	1.924			0.00116836			0.00139603	0.00530064
	0.016			0.0581	4.168			0.000925109			0.000965178	0.00618834
	0.0588			1.1299	2.518			0.00111789			0.00133235	0.00575886
	0.0704			0.5494	1.34			0.000929154			0.00104343	0.0104332
	0.693			0.3869	2.777			0.000903539			0.000968985	0.00708485
	0.2458			0.3532	1.191			0.00112575			0.00124282	0.00428301
	0.1446			0.1236	0.988			0.000767075			0.00130191	0.00548661
	0.0374			0.1013	1.954			0.00206342			0.000971653	0.00683345
	0.2391			0.0635	4.937			0.00102542			0.00157282	0.0100106
	0.1318			0.0216	4.456			0.00177601			0.00140744	0.00747881
	0.0669			0.2871	2.083			0.00166985			0.00154011	0.00707533
	0.0492			0.5239	6.755			0.00138182			0.00352819	0.00489399
	0.1372			0.194	7.419			0.00124966			0.0023517	0.00610454
	0.2084			0.1799	5.22212			0.00194419			0.00137611	0.004715
	0.3253			0.0363	1.05149			0.00512637			0.00137357	0.00638269
	0.2395			0.0407	7.92038			0.00222157			0.00103976	0.00709475
	0.012			0.1628	3.5573			0.00152577			0.00087323	0.00888831
	0.2463			0.0613	11.8099			0.00135772			0.0011529	0.010862
	0.1437			0.0687	3.2519			0.000783309			0.00104179	0.00364387
	0.0611			0.0601	2.4367			0.000966825			0.00364842	0.00603554
	0.1195			0.0567	4.3635			0.000782669			0.00107186	0.0101021
	0.0511			0.4187	7.3073			0.00172921			0.000976339	0.0068203
	0.4934			0.4107	6.6804			0.00126678			0.00140807	0.00702655
	0.084			0.1427	5.3393			0.000882111			0.00119703	0.00400577
	0.4085			0.0251	3.9403			0.00107159			0.001091	0.00862067
	0.0938			0.6617	4.2775			0.00139488			0.0018634	0.00969001
	0.1566			0.0327	15.8212			0.00168266			0.00117001	0.00373645
	0.0321			0.0985	4.8939			0.00203246			0.00168571	0.00410306
	0.1645			0.0373	6.1418			0.00148036			0.00122112	0.00651243
	0.0007			0.812	6.7871			0.00105537			0.00141898	0.00694996
	0.2007			0.4157	2.771			0.00151271			0.000887938	0.00536441
	0.0789			0.0183	6.523			0.00147619			0.00181127	0.00402773
	0.1968			0.0962	2.356			0.00093589			0.0012432	0.0075425
	0.1373			0.3358	2.366			0.00140326			0.000911407	0.00716625
	0.0448			0.3604	2.591			0.00195789			0.00220052	0.00385525
	0.1114			0.0981	7.674			0.00126425			0.00107972	0.0138885
	0.0811			0.1653	14.481			0.000778481			0.000933349	0.00377766
	0.0643			0.3886	4.46			0.000795357			0.00102581	0.0122593
	0.138			0.4359	11.789			0.000982054			0.00223248	0.00661051
	0.1319			0.2298	3.012			0.00135785			0.00106995	0.0031793
	0.0969			0.0241	11.426			0.00111839			0.00126628	0.00332836
	0.0746			0.1059	3.185			0.00111547			0.0034219	0.00361303
	0.0258			0.0491	1.162			0.000880711			0.00175445	0.00753954
	0.0301			0.1706	2.284			0.000879064			0.00161139	0.00370341
	0.0838			0.127	1.346			0.00106881			0.00143446	0.00333644
	0.3282			0.1102	2.034			0.000881471			0.000922948	0.00497135
	0.0005			0.1335	0.779			0.000889719			0.00159629	0.00423353
	0.1453			0.0542	3.357			0.00146958			0.00102948	0.00379763
	0.3163			0.0721	0.802			0.000811465			0.000868663	0.0035382
	0.0649			0.0391	0.883			0.00080017			0.00126133	0.00424079
	0.2493			0.1	0.91			0.00220711			0.00102822	0.00494286
	0.0119			0.3459	1.203			0.00114376			0.00177372	0.00970131
	0.0357			0.1593	0.047			0.00106538			0.00127237	0.00834637
	0.5842			0.5969	1.598			0.000955418			0.000975326	0.00678724
	0.3461			0.4771	2.601			0.00231872			0.00164868	0.0102753
	0.0462			0.4046	1.319			0.00172287			0.00125093	0.00516894
	0.4295			0.1472	4.303			0.00227331			0.00165945	0.00640355
	0.0595			0.0375	0.798			0.00145018			0.00116025	0.00770971
	0.5676			0.3872	1.659			0.0018095			0.001923	0.00803661
	0.2274			0.4082	1.091			0.00103444			0.00270797	0.00683451
	1.0872			0.3524	2.542			0.00110926			0.00238696	0.00489308
	0.1788			0.0651	4.201			0.00127731			0.00150839	0.00322906
	0.1169			0.1079	1.621			0.0010461			0.00112689	0.00363581
	0.22			0.3912	1.803			0.00137561			0.00129431	0.00619968
	0.1538			0.0466	2.961			0.00100348			0.00125994	0.00743624
	0.189			0.0371	6.4141			0.00148354			0.00124332	0.0077866
	0.2137			0.1614	4.871			0.00161114			0.00119487	0.00461983
	0.0708			0.3286	1.11			0.00124548			0.00153642	0.00837849
	0.0143			0.0661	1.956			0.00169242			0.00345043	0.00472382
	1.0996			0.4391	1.673			0.00188965			0.00151132	0.00720054
	0.0915			0.1556	9.189			0.00106589			0.00179288	0.00415751
	0.1973			0.2932	2.904			0.00135164			0.00124942	0.00659373
	0.1059			0.5539	6.656			0.00134897			0.00164474	0.00370925
	0.1306			0.1503	4.917			0.00453319			0.000983439	0.00727109
	0.0421			0.421	3.654			0.00103811			0.0012536	0.00536712
	0.4286			0.3162	4.078			0.000854455			0.00105473	0.00488874
	0.0905			0.0098	2.381			0.00229184			0.00149356	0.0118435
	0.7269			0.0647	1.231			0.00133122			0.00151398	0.00391871
	0.0255			0.0422	9.963			0.00165133			0.00143788	0.00443418
	0.2026			0.023	5.904			0.0013269			0.00217705	0.0043147
	0.0498			0.0246	5.874			0.00159325			0.00183486	0.00705327
	0.1576			0.0334	1.876			0.00121579			0.0013264	0.00364435
	0.1907			0.2165	2.093			0.00153504			0.000908241	0.0127623
	0.0804			0.2177	8.76			0.00122442			0.00107958	0.00670313
	0.2599			0.4598	7.174			0.0026552			0.00189904	0.0125779
	0.2691			0.3242	3.883			0.00222487			0.00131689	0.00632372
	0.0892			0.0798	9.813			0.0022198			0.00151296	0.00707275
	0.0701			0.0521	9.575			0.0016696			0.00146794	0.00482994
	0.4654			0.025	0.8435			0.00154112			0.00102568	0.00989781
	0.114			0.1498	3.8171			0.00127465			0.00160149	0.00996162
	0.1063			0.016	0.4378			0.00182383			0.00115252	0.00405119
	0.1652			0.1066	1.0623			0.00102124			0.00363967	0.00633492
	0.0335			0.1853	1.2817			0.00101998			0.00160619	0.00343822
	0.0347			0.026	0.961			0.00187659			0.00236882	0.00917253
	0.0338			0.0991	0.557			0.00194799			0.00347592	0.00728359
	0.0872			0.8	0.194			0.00104433			0.00582395	0.0104687
	0.4016			0.1211	1.73			0.00109214			0.00102479	0.00363617
	0.1756			0.2235	19.561			0.00165591			0.00218619	0.00331879
	0.5017			0.1199	0.148			0.00160479			0.0012158	0.00502656
	0.4356			0.0616	6.576			0.00108592			0.00264595	0.00392707
	0.0672			0.0622	0.442			0.00159413			0.00163295	0.0107172
	0.0439			0.409	2.01			0.00126616			0.00102478	0.00742218
	0.2716			0.1623	6.837			0.00150523			0.00110089	0.0116924
	0.1751			0.3195	1.532			0.0010674			0.00134567	0.0108206
	0.0235			0.0146	1.994			0.00155888			0.000989527	0.00463802
	0.0716			0.2603	0.236			0.0014167			0.00238226	0.00480856
	0.1411			0.2374	0.741			0.00185554			0.00170144	0.00692472
	0.0986			0.0747	2.393			0.00182547			0.0010617	0.00664111
	0.1086			0.1333	8.822			0.00140668			0.00116406	0.00408892
	0.0007			0.0496	28.547			0.00148265			0.0018426	0.00565894
	0.2982			0.2466	2.47			0.00113171			0.00179465	0.00571357
	0.0742			0.2693	5.935			0.000898853			0.000966065	0.00808062
	0.9434			0.3279	1.30358			0.00176536			0.00155596	0.0129209
	0.1008			0.1294	0.80241			0.001082			0.00127224	0.00566885
	0.0996			0.0573	1.211			0.000932842			0.00135062	0.0147202
	0.0319			0.2338	2.9105			0.00174468			0.00302504	0.00710483
	0.1557			0.0605	2.6554			0.00103709			0.00143788	0.0130148
	0.0116			0.1002	1.6312			0.000910133			0.00118294	0.00460853
	0.405			0.2184	4.4265			0.000893392			0.000858769	0.00487281
	0.0753			0.6182	1.5476			0.000976339			0.00195028	0.00471152
	0.3751			0.1337	2.5657			0.000702389			0.00159363	0.00393566
	0.1682			0.3061	4.6089			0.00111471			0.00106879	0.00405604
	0.2448			0.0239	1.1364			0.00188381			0.00222677	0.012094
	0.246			0.2664	1.6752			0.00127046			0.00139514	0.0036511
	0.0547			0.3842	3.2536			0.00119234			0.00212175	0.00501978
	0.0857			0.3249	2.4845			0.00124116			0.0030395	0.00497742
	0.1122			0.6114	2.1834			0.00121136			0.00193633	0.0032709
	0.2003			0.2465	4.6495			0.00165527			0.00095275	0.00630158
	0.235			1.0348	1.7474			0.00121833			0.00120197	0.014189
	0.3989			0.3245	6.165			0.00163599			0.00108745	0.0107313
	0.0703			0.1076	0.6988			0.00201852			0.00274627	0.00621998
	0.2855			0.0459	2.565			0.00301807			0.001628	0.0533743
	0.0395			0.2048	4.0722			0.000922948			0.00125245	0.00771445
	0.0991			0.1198	2.3456			0.00166402			0.002113	0.00375623
	0.1966			0.0577	4.3357			0.000937402			0.00153022	0.00429241
	0.0843			0.019	2.6881			0.000884257			0.00209714	0.0109727
	0.3866			0.0235	0.823			0.00163294			0.00140516	0.00604622
	0.0001			0.0278	8.7302			0.0010116			0.000912555	0.00983074
	0.0215			0.4889	3.4543			0.00107273			0.0011586	0.00828134
	0.0282			0.0607	0.5708			0.000855476			0.00168228	0.017943
	0.0531			0.0753	1.5423			0.00118347			0.00342063	0.00368068
	0.3197			0.1329	1.7081			0.00162394			0.000996254	0.00935514
	0.1164			0.1792	2.1695			0.00138144			0.00116113	0.00368921
	0.1367			0.1191	3.9888			0.0011364			0.001169	0.0107956
	0.2446			0.5551	3.4405			0.000758566			0.00131181	0.00443596
	0.2963			0.1513				0.00107794			0.00137904	0.0043967
	0.2283			0.058				0.00289454			0.00115061	0.00532885
	0.3808			0.2019				0.00234358			0.0015311	0.00844657
	0.1584			0.1861				0.00144131			0.00279675	0.00575963
	0.0095			0.1135				0.00102378			0.00193468	0.00395358
	0.1978			0.2453				0.00156167			0.00221611	0.0045425
	0.1451			0.1218				0.000962012			0.00123432	0.00531157
	0.1467			0.0651				0.000770241			0.00114415	0.0135605
	0.0317			0.1348				0.00115543			0.00113932	0.00390795
	0.1014			0.0589				0.00108276			0.00162991	0.00474183
	0.0684			0.2685				0.0014796			0.00190246	0.00458966
	0.0875			0.24				0.00152007			0.00128911	0.0560628
	0.086			0.6099				0.000777602			0.00236209	0.00436327
	0.3274			0.3024				0.00119601			0.00142165	0.010276
	0.2021			0.1779				0.00105498			0.00195408
	0.1583			0.0387				0.00207698			0.00144866
	0.0614			0.0381				0.00457225			0.00398008
	0.1616			0.3689				0.00408332			0.00106919
	0.2289			0.218				0.00122607			0.00100729
	0.0754			1.1641				0.0024529			0.000909001
	0.0758			0.0352				0.00107425			0.0012607
	0.1855			0.1612				0.00113893			0.00107983
	0.0297			0.5151				0.00127972			0.000938296
	0.0247			0.0226				0.00113996			0.00104521
	0.1213			0.0631				0.00198236			0.00125461
	0.0438			0.0603				0.00142823			0.00152159
	0.1351			0.0885				0.00106234			0.00208611
	0.071			0.8623				0.00107121			0.00101921
	0.3786			0.0469				0.00123355			0.0014975
	0.0715			0.1147				0.00171679			0.00114465
	0.1485			0.1441				0.00113767			0.0013236
	0.0775			0.028				0.00102491			0.00142774
	0.1112			0.3634				0.000941843			0.00116164
	0.4713			0.0632				0.00113082			0.00200812
	0.1271			0.0292				0.00103659			0.00118587
	0.018			0.8978				0.00741238			0.00146554
	0.0695			0.1415				0.00717837			0.00203919
	0.0437			0.607				0.00372045			0.00132551
	0.0825			0.072				0.00116798			0.00139234
	0.1651			0.2231				0.00113298			0.0017207
	0.2933			0.0191				0.00115049			0.00188445
	0.0777			0.2434				0.00241841			0.00113057
	0.3284			1.0799				0.00114489			0.00138601
	0.111			0.3173				0.0013269			0.00146654
	0.3144			0.1333				0.00138018			0.000991046
	0.0471			0.2082				0.000899993			0.00123305
	0.0684			0.0207				0.00151715			0.00109468
	0.1379			0.0664				0.00160796			0.00244999
	0.2928			0.5598				0.00133794			0.00150739
	0.0936			0.0207				0.000978239			0.00190944
	0.1549			0.1223				0.00108478			0.00132994
	0.0261			0.1753				0.00119513			0.00252343
	0.2006			0.153				0.000856861			0.00157943
	0.0528			0.2682				0.00115403			0.00104497
	0.1537			0.1893				0.00121859			0.000798531
	0.0353			0.025				0.00146464			0.00144892
	0.1734			0.2166				0.00182827			0.00132792
	0.2969			0.3888				0.00400583			0.001463
	0.163			0.0803				0.00308123			0.00115365
	0.3625			0.335				0.00211262			0.00158653
	0.2393			0.0895				0.00112892			0.00111826
	0.1285			0.0904				0.000854075			0.00122328
	0.3889			0.4827				0.00100856			0.00195941
	0.0478			0.0436				0.000799671			0.00158501
	0.5855			0.0202				0.00107972			0.00149482
	0.1522			0.2219				0.00105891			0.00146882
	0.3753			0.3995				0.00114439			0.00136799
	0.0259			0.0635				0.0015349			0.0019707
	0.209			0.3047				0.000936516			0.00107159
	0.0931			0.0253				0.000782423			0.000963658
	0.0128			0.1627				0.00178223			0.000922307
	0.118			0.3483				0.00163979			0.00192377
	0.0463			0.2407				0.000761755			0.00103063
	0.0859			0.1662				0.00173607			0.00194786
	0.0644			0.1494				0.00116228			0.00183613
	0.034			0.3081				0.00117216			0.00109912
	0.0445			0.1282				0.00108301			0.000928514
	0.0406			0.077				0.000821479			0.00104368
	0.3856			0.1176				0.000802837			0.00313919
	0.1088			0.2764				0.00094451			0.00279079
	0.0639			0.18				0.00182852			0.00225493
	0.1164			0.1226				0.000771247			0.00168177
	0.4804			0.0161				0.00104724			0.00138842
	0.0232			0.1724				0.00154264			0.000774428
	0.1293			0.1195				0.000826687			0.00209411
	0.0416			0.0167				0.00142115			0.00227851
	0.5675			0.1218				0.00200304			0.000804231
	0.2423			0.1045				0.00104482			0.00123204
	0.1017			0.0389				0.000915974			0.00119843
	0.0761			0.1461				0.0010896			0.000861183
	0.1272			0.1481				0.00100476			0.000959478
	0.016			0.1674				0.00114351			0.00182865
	0.0614			0.3676				0.00170828			0.00201826
	0.0905			0.3479				0.00103355			0.000835046
	0.4538			0.1137				0.00126755			0.000975706
	0.4021			0.1736				0.0012366			0.00130674
	0.0969			1.0301				0.00135329			0.00117293
	0.0315			0.3094				0.00140389			0.0066566
	0.0412			0.1197				0.00110558			0.00247599
	0.0325			0.3294				0.00121757			0.00583486
	0.1154			0.108				0.00175966			0.00173885
	0.2352			0.0455				0.00146566			0.00105016
	0.2506			0.0394				0.0029686			0.00101972
	0.0722			0.0227				0.00152247			0.0010669
	0.0178			0.3837				0.00258697			0.000846595
	0.2949			0.2105				0.00188166			0.000902787
	0.0427			0.0388				0.0018412			0.00108059
	0.6036			0.6436				0.00094527			0.00158462
	0.0714			0.0247				0.00189523			0.00105257
	0.2705			0.0481				0.00109594			0.00104546
	0.334			0.0411				0.00149571			0.00105802
	0.1785			0.6276				0.00129114			0.00100373
	0.1595			0.9045				0.00113476			0.00156395
	0.0459			0.0595				0.00100259			0.00163903
	0.259			0.107				0.00105473			0.00149179
	0.0648			0.0954				0.00176345			0.00138373
	0.6318			0.058				0.00125055			0.00128847
	0.0734			0.061				0.000983819			0.00183219
	0.3242			0.071				0.0013132			0.00131942
	0.2885			0.033				0.00161557			0.00188927
	0.0857			0.018				0.00127287			0.00212416
	0.4996			0.037				0.00202676			0.00170181
	0.8698			0.092				0.00108212			0.00227471
	0.0914			0.036				0.00108744			0.0014758
	0.0635			0.048				0.00143649			0.001472
	0.256			0.088				0.00125246			0.00127097
	0.3168			0.083				0.00115175			0.00143179
	0.0404			0.139				0.000969753			0.000919141
	0.5505			0.149				0.0015325			0.000887945
	0.0376			0.096				0.000945397			0.000932716
	0			0.096				0.0010891			0.00105739
	0.2014			0.054				0.0013009			0.000861183
	0.158			0.037				0.00152667			0.00120616
	0.3536			0.081				0.0012333			0.000810571
	0.031			0.028				0.00138208			0.000776336
	0.2945			0.099				0.001463			0.0029128
	0.2741			0.079				0.00124218			0.000748172
	0.0092			0.106				0.000705428			0.00134326
	0.0353			0.081				0.00100742			0.000750072
	0.0692			0.131				0.0011605			0.0009057
	0.059			0.135				0.00134262			0.00108808
	0.043			0.156				0.00272344			0.00101528
	0.2156			0.191				0.00143573			0.00101997
	0.3125			0.145				0.00136077			0.00236768
	0.1			0.248				0.00164499			0.00136444
	0.2079			0.051				0.000741832			0.00113818
	0.8405			0.094				0.00176625			0.000843421
	0.2997			0.028				0.0011052			0.000826813
	0.1779			0.124				0.00131181			0.00147466
	0.3993			0.038				0.00182509			0.00878279
	0.2211			0.041				0.000967979			0.00246825
	0.0746			0.085				0.00118384			0.00106905
	0.0753			0.046				0.00165134			0.00158399
	0.2955			0.024				0.000700995			0.000691734
	0.2147			0.177				0.00109353			0.000784703
	0.0586			0.098				0.00190704			0.0020033
	0.2736			0.068				0.00108834			0.00711166
	0.0242			0.027				0.00211972			0.00139552
	0.0605			0.176				0.00109531			0.00118042
	0.4479			0.021				0.00109493			0.00353464
	0.3366			0.029				0.00115149			0.00166998
	0.1141			0.13				0.00146109			0.00099346
	0.0596			0.027				0.000989914			0.000868157
	0.0375			0.075				0.00192782			0.0015207
	0.5214			0.069				0.00131562			0.00140884
	0.3096			0.13				0.00204998			0.00538549
	0.0229			0.107				0.0010702			0.00200735
	0.1211			0.088				0.00152907			0.00635081
	0.2671			0.151				0.00116088			0.00129113
	0.2646			0.188				0.00102111			0.00068628
	0.1326			0.023				0.00178248			0.00205085
	0.0528			0.135				0.00122785			0.00188243
	0.2331			0.061				0.00151753			0.00086993
	0.3383			0.049				0.00110862			0.00150244
	0.1493			0.147				0.00108136			0.00231923
	0.0464			0.125				0.0016337			0.00226786
	0.0578			0.136				0.00103761			0.00114921
	0.3052			0.153				0.000992075			0.00279649
	0.0946			0.064				0.00135544			0.000895306
	0.1156			0.09				0.00115924			0.00149255
	0.0119288			0.027				0.00122835			0.000804991
	0.0539412			0.194				0.00124979			0.00183258
	0.0684435			0.055				0.000998668			0.000959218
	0.126215			0.027				0.00119805			0.00087703
	0.023781			0.06				0.00161785			0.00158171
	0.02742			0.211				0.00210235			0.00366986
	0.069091			0.03				0.00268653			0.00338487
	0.023969			0.052				0.00894387			0.00101198
	0.101087			0.143				0.00203005			0.00148976
	0.033176			0.079				0.00183347			0.00152134
	0.193378			0.092				0.00120439			0.000817418
	0.146024			0.104				0.00134821			0.00417502
	0.07195			0.034				0.00163878			0.00087741
	0.021648			0.102				0.000833787			0.000742719
	0.051137			0.09				0.00234105			0.000985727
	0.04428			0.071				0.0010896			0.000936903
	0.14792			0.051				0.000897706			0.000900246
	0.10842			0.208				0.00110875			0.00067994
	0.03127			0.102				0.00165501			0.00146134
	0.02031			0.037				0.00151817			0.0025233
	0.01922			0.065				0.00205389			0.00143611
	0.03407			0.089				0.000942983			0.00111839
	0.05072			0.099				0.0013047			0.0010045
	0.05981			0.149				0.000888951			0.00335848
	0.03689			0.033				0.000953771			0.00112081
	0.03615			0.06				0.00087031			0.00137916
	0.02759			0.213				0.000833273			0.000908859
	0.03088			0.02				0.00159819			0.00116139
	0.02646			0.025				0.00123749			0.00254815
	0.0319			0.028				0.00134123			0.00142165
	0.0051			0.111				0.00072217			0.000662565
	8e-05			0.096				0.000771888			0.00148608
	0.02975			0.128				0.00121009			0.00123698
	0.02075			0.562				0.0011			0.000951737
	0.01413			0.091				0.000863336			0.00172795
	0.07167			0.151				0.00101122			0.00115505
	0.03671			0.04				0.000790663			0.00100424
	0.05445			0.044				0.000919268			0.0023158
	0.03639			0.035				0.000674106			0.0014772
	0.05467			0.055				0.000785969			0.00315111
	0.05489			0.677				0.00174849			0.00126742
	0.02647			0.167				0.00118891			0.000703022
	0.04077			0.185				0.00419392			0.000841267
	0.0448			0.089				0.00164779			0.00250453
	0.18635			0.052				0.00141644			0.000879064
	0.07735			0.218				0.000805877			0.000832647
	0.09793			0.15				0.00210362			0.000677399
	0.10719			0.043				0.000926368			0.00198629
	0.04362			0.01				0.00557206			0.000793077
	0.33457			0.075				0.00199987			0.00134072
	0.07118			0.09				0.00204401			0.00154962
	0.0599			0				0.00248309			0.00629906
	0.06167			0.106				0.00304178			0.00135316
	0.06712			0.166				0.00452482			0.00967098
	0.10933			0.168				0.0044453			0.00220775
	0.15229			0.18				0.00122658			0.00130243
	0.03396			0.052				0.00421256			0.0011728
	0.13254			0.049				0.00251099			0.000832394
	0.26831			0.045				0.00162686			0.00111851
	0.05895			0.237				0.00522682			0.00281578
	0.10429			0.059				0.00213571			0.00267537
	0.02958			0.173				0.00244581			0.00320084
	0.12312			0.026				0.00108897			0.00256376
	0.14769			0.136				0.00269909			0.0020227
	0.00047			0.086				0.00209258			0.00094565
	0.07793			0.12				0.00195485			0.000729658
	0.0281			0.03				0.000902407			0.00465812
	0.04815			0.06				0.00263453			0.00124776
	0.04031			0.157				0.00145868			0.0067568
	0.15121			0.076				0.00117395			0.00385249
	0.06582			0.16				0.001619			0.00355671
	0.08445			0.137				0.00149266			0.00155634
	0.17105			0.311				0.00222792			0.00170866
	0.09857			0.064				0.000848874			0.00144993
	0.08574			0.055				0.0021442			0.00176561
	0.16952			0.11				0.00140186			0.00325854
	0.02815			0.045				0.000883117			0.00276009
	0.04544			0.079				0.00112359			0.00206607
	0.14511			0.136				0.00107718			0.00113501
	0.21254			0.139				0.00087069			0.000794969
	0.02668			0.199				0.0015557			0.000832386
	0.07536			0.097				0.00150333			0.000775315
	0.05583			0.069				0.000864603			0.00107882
	0.04355			0.013				0.00174659			0.000916101
	0.13088			0.045				0.00111078			0.00107693
	0.03731			0.044				0.000958964			0.00164462
	0.03123			0.031				0.00346097			0.00122341
	0.1891			0.072				0.00185833			0.000938162
	0.0425			0.133				0.000999168			0.000944629
	0.04279			0.072				0.00152222			0.00314286
	0.05352			0.079				0.000780001			0.00133591
	0.05784			0.072				0.00233065			0.000659771
	0.06269			0.115				0.00170968			0.00136698
	0.02805			0.123				0.00122975			0.000972793
	0.03677			0.068				0.000990801			0.000852428
	0.04566			0.1				0.00121478			0.00128847
	0.04527			0.146				0.000771001			0.00197932
	0.05324			0.14				0.00148798			0.00182979
	0.02678			0.379				0.00233775			0.00230667
	0.05895			0.195				0.00249273			0.00160542
	0.00614			0.064				0.00100805			0.00164208
	0.03363			0.056				0.000924982			0.0031364
	0.01051			0.125				0.000656344			0.00201166
	0.01295			0.091				0.00210031			0.00219012
	0.02959			0.022				0.00156952			0.00176511
	0.04578			0.104				0.0022997			0.00243299
	0.04574			0.209				0.00102859			0.00304533
	0.02418			0.028				0.000715956			0.00823539
	0.05592			0.099				0.00117179			0.00510089
	0.03311			0.028				0.0009837			0.00597983
	0.01966			0.078				0.00456097			0.000732444
	0.02056			0.032				0.0011548			0.00227839
	0.02554			0.058				0.000951365			0.00416259
	0.02985			0.111				0.00382205			0.000959851
	0.09333			0.035				0.00509049			0.00624249
	0.02295			0.04				0.00243174			0.00165578
	0.19474			0.128				0.00164297			0.000932083
	0.09068			0.076				0.00393835			0.00233737
	0.05506			0.243				0.00161545			0.000953257
	0.03052			0.045				0.000903167			0.000720903
	0.10964			0.036				0.00162331			0.000855982
	0.15291			0.016				0.000956431			0.00100171
	0.03458			0.093				0.00368863			0.00202929
	0.11249			0.187				0.00193799			0.000744238
	0.0756			0.029				0.00110471			0.00406734
	0.02531			0.047				0.000815012			0.00164144
	0.08029			0.022				0.0014602			0.00121555
	0.04707			0.472				0.0017041			0.00279447
	0.21653			0.057				0.00338233			0.00324547
	0.02963			0.108				0.00106271			0.00163446
	0.11851			0.051				0.00518358			0.00156433
	0.11095			0.013				0.00139691			0.00142012
	0.10263			0.122				0.00272965			0.00136381
	0.09038			0.038				0.00616741			0.000854328
	0.12246			0.19				0.00223805			0.00400494
	0.09139			0.068				0.00358602			0.00255805
	0.07616			0.026				0.00299168			0.00291457
	0.0306			0.119				0.00335544			0.00232404
	0.08488			0.031				0.00156218			0.000958838
	0.05203			0.034				0.00368102			0.0018313
	0.04782			0.053				0.00293335			0.00119995
	0.22312			0.416				0.00439051			0.00277556
	0.0863			0.086				0.00354277			0.00113221
	0.0536			0.049				0.00149014			0.00101071
	0.0498			0.24				0.00131321			0.00203982
	0.1238			0.05				0.000842914			0.000897706
	0.0169			0.037				0.00118764			0.00617476
	0.021			0.091				0.00396169			0.00117014
	0.0245			0.088				0.000794217			0.00108086
	0.0412			0.174				0.00375939			0.000857756
	0.2186			0.029				0.000977226			0.00201102
	0.2287			0.085				0.00140986			0.00205453
	0.1012			0.119				0.00090152			0.0035902
	0.1196			0.283				0.00185185			0.00363903
	0.0969			0.043				0.0018842			0.00136178
	0.0323			0.058				0.0019953			0.00139742
	0.059			0.107				0.00135455			0.00133464
	0.2147			0.223				0.00276872			0.000997268
	0.1013			0.096				0.00142913			0.0013217
	0.0383			0.035				0.00112524			0.00161012
	0.0451			0.036				0.00247117			0.00299968
	0.0583			0.131				0.00195281			0.00370067
	0.1231			0.147				0.00318764			0.000832394
	0.0314			0.039				0.00216069			0.00194938
	0.0378			0.046				0.00245342			0.0032002
	0.1459			0.034				0.00222246			0.000935368
	0.0449			0.322				0.00200253			0.0032976
	0.14			0.09				0.00324319			0.000902399
	0.0845			0.016				0.00483277			0.00115872
	0.11			0.046				0.000908226			0.000706829
	0.0432			0.185				0.00108719			0.000806518
	0.1399			0.098				0.000875637			0.0020147
	0.0658			0.088				0.00129037			0.00136305
	0.1349			0.041				0.00235385			0.0024283
	0.0543			0.059				0.0021059			0.00106906
	0.048			0.123				0.000664331			0.00285737
	0.0152			0.059				0.00177791			0.00116189
	0.0431			0.122				0.00133882			0.00143319
	0.0751			0.041				0.00134415			0.00231327
	0.0753			0.043				0.00340971			0.000743993
	0.0516			0.085				0.00184475			0.00107958
	0.1955			0.045				0.0014016			0.00154872
	0.0156			0.096				0.00398628			0.00150269
	0.1663			0.071				0.00625594			0.0014025
	0.1067			0.06				0.000841133			0.00368354
	0.2499			0.037				0.000703402			0.00124066
	0.1646			0.348				0.000786729			0.00121897
	0.0429			0.226				0.00147884			0.00120489
	0.023			0.031				0.000977233			0.00071723
	0.037			0.089				0.00216145			0.0055122
	0.0673			0.041				0.00183994			0.00268704
	0.0419			0.331				0.00221712			0.0016852
	0.0106			0.217				0.000924595			0.00178235
	0.0492			0.051				0.00313158			0.00106093
	0.1601			0.188				0.00208078			0.00117458
	0.0153			0.109				0.00227953			0.000934623
	0.0265			0.125				0.0031			0.000961639
	0.0652			0.124				0.00407876			0.00548924
	0.0189			0.516				0.00188965			0.000808932
	0.1666			0.077				0.00183181			0.00214674
	0.0289			0.035				0.00191528			0.000994094
	0.0609			0.153				0.00171094			0.0012087
	0.0682			0.094				0.000845581			0.00113944
	0.0336			0.1				0.00880815			0.00237059
	0.0568			0.055				0.00203779			0.000741951
	0.0345			0.198				0.000675499			0.00195142
	0.0432			0.103				0.00132488			0.00507299
	0.2838			0.19				0.00115175			0.000825532
	0.1305			0.112				0.00119843			0.00197932
	0.0541			0.04				0.000733845			0.00352412
	0.0459			0.158				0.000725478			0.00175343
	0.1439			0.029				0.00068856			0.00283353
	0.0268			0.046				0.00101934			0.00302403
	0.1747			0.143				0.00163523			0.00407431
	0.0255			0.134				0.000705808			0.000782803
	0.0729			0.091				0.00197412			0.000702135
	0.0995			0.079				0.00149699			0.00233102
	0.0751			0.078				0.00383651			0.00418264
	0.0349			0.129				0.000827946			0.00163903
	0.1077			0.022				0.00320184			0.00220964
	0.0835			0.173				0.00150307			0.00186188
	0.0804			0.06				0.00440902			0.00231263
	0.1425			0.055				0.000727378			0.00122391
	0.2397			0.102				0.00221307			0.00257099
	0.0128			0.027				0.00130039			0.000894167
	0.0503			0.162				0.000656225			0.00172693
	0.055			0.12				0.00209169			0.00147657
	0.1242			0.042				0.00137346			0.00106678
	0.0365			0.03				0.00357258			0.00296251
	0.0001			0.025				0.00283074			0.00087361
	0.1442			0.061				0.00214319			0.00158323
	0.0455			0.147				0.00135366			0.00242323
	0.0648			0.104				0.00158703			0.00133324
	0.03			0.065				0.000963531			0.00359083
	0.0735			0.11				0.000896819			0.00274082
	0.1466			0.308				0.00127237			0.00109772
	0.0136			0.076				0.00153998			0.00132094
	0.1967			0.188				0.0016138			0.00139412
	0.0256			0.093				0.00197298			0.00322341
	0.033			0.098				0.00121579			0.00198833
	0.3957			0.215				0.00115607			0.000960618
	0.062			0.115				0.00120882			0.000772901
	0.1189			0.05				0.00113615			0.000952758
	0.145			0.117				0.000972159			0.00339627
	0.149			0.184				0.000744238			0.00237541
	0.1194			0.03				0.00129151			0.00119081
	0.0263			0.126				0.0116551			0.00688756
	0.2155			0.253				0.000676394			0.00193151
	0.0376			0.149				0.00160822			0.00432785
	0.0601			0.088				0.00249857			0.00178882
	0.0528			0.108				0.000917748			0.00110508
	0.0909			0.235				0.00255703			0.00192999
	0.0558			0.104				0.00185731			0.000837848
	0.0745			0.025				0.00098218			0.00155076
	0.0869			0.055				0.0012484			0.00107806
	0.0881			0.207				0.000873357			0.000892378
	0.0454			0.289				0.0026372			0.00140998
	0.1852			0.046				0.00085827			0.00225226
	0.0511			0.126				0.00327516			0.00103278
	0.0408			0.043				0.00220901			0.00105117
	0.1298			0.019				0.00418529			0.00252152
	0.0752			0.192				0.0007658			0.00125981
	0.1304			0.042				0.000969246			0.00101376
	0.0278			0.012				0.0016403			0.0010853
	0.1123			0.025				0.00111218			0.00583371
	0.1543			0.077				0.00361481			0.00561772
	0.0551			0.127				0.0049081			0.00134619
	0.0549			0.151				0.00172704			0.000980914
	0.1506			0.187				0.00131004			0.00142381
	0.0505			0.246				0.00136495			0.00114528
	0.02			0.055				0.00306182			0.000722937
	0.084			0.144				0.00527629			0.00101262
	0.1386			0.025				0.00105751			0.000950724
	0.0785			0.178				0.00139425			0.000910766
	0.0789			0.062				0.00171513			0.00119665
	0.0275			0.063				0.00162749			0.000830606
	0.0661			0.176				0.00138322			0.00087183
	0.0879			0.025				0.00184792			0.00314008
	0.0441			0.112				0.00220597			0.00101592
	0.0183			0.06				0.00266649			0.000952624
	0.0413			0.103				0.0021749			0.00109201
	0.0493			0.129				0.000781149			0.001082
	0.0013			0.061				0.00170194			0.00113373
	0.0944			0.095				0.00103748			0.00538956
	0.0529			0.028				0.00373174			0.00554226
	0.0683			0.018				0.0030584			0.00107514
	0.0679			0.268				0.00243211			0.00214852
	0.0467			0.206				0.00236476			0.00346033
	0.0384			0.045				0.00126019			0.00165984
	0.0895			0.059				0.00214281			0.00110228
	0.1214			0.085				0.00371373			0.00142114
	0.0625			0.138				0.00176434			0.00109416
	0.0767			0.077				0.00232532			0.00228473
	0.044			0.119				0.00181545			0.0021078
	0.0539			0.03				0.00320806			0.00174861
	0.0322			0.171				0.00264657			0.00907298
	0.0523			0.28				0.00202219			0.00163066
	0.024			0.047				0.00120946			0.000910774
	0.0428			0.064				0.000723571			0.00232836
	0.0689			0.104				0.000663951			0.00219404
	0.2083			0.02				0.000877418			0.00107843
	0.1267			0.058				0.00102936			0.000862196
	0.0548			0.115				0.000836067			0.00177932
	0.0273			0.043				0.000782795			0.00246458
	0.0534			0.06				0.000681587			0.000897959
	0.0018			0.117				0.00382472			0.0019135
	0.131			0.011				0.00224034			0.000962384
	0.1708			0.016				0.00515746			0.00181051
	0.0274			0.02				0.00102479			0.00249731
	0.0929			0.037				0.00219113			0.00131181
	0.1677			0.128				0.00135975			0.000847995
	0.0505			0.055				0.00212607			0.00156762
	0.0347			0.105				0.000698835			0.00465304
	0			0.045				0.00596017			0.00104686
	0.0562			0.078				0.000823893			0.00156344
	0.0416			0.06				0.0009766			0.00423869
	0.0515			0.12				0.000781149			0.00172071
	0.1431			0.098				0.00205719			0.00233939
	0.0831			0.019				0.00194368			0.00604209
	0.0401			0.177				0.000862703			0.00101769
	0.1866			0.069				0.00206164			0.000908494
	0.1154			0.051				0.000885144			0.00158868
	0.1259			0.037				0.00107667			0.000971898
	0.1337			0.054				0.00433102			0.00234991
	0.1051			0.067				0.00289846			0.00195142
	0.092			0.039				0.00213621			0.00402029
	0.0219			0.078				0.000800423			0.00550268
	0.0655			0.121				0.0026221			0.00127376
	0.0912			0.09				0.00318193			0.00274043
	0.1263			0.103				0.000863336			0.00138677
	0.1214			0.067				0.000882365			0.000811212
	0.0487			0.212				0.000665858			0.00195166
	0.1515			0.043				0.00316887			0.00173162
	0.0639			0.043				0.00158983			0.00071799
	0.1126			0.144				0.00477265			0.00250466
	0.1374			0.065				0.00450657			0.000808157
	0			0.111				0.00403424			0.000782035
	0.0464			0.035				0.00122987			0.00111561
	0.0323			0.097				0.000866503			0.00139159
	0.1131			0.051				0.000809178			0.000850402
	0.0343			0.21				0.00149965			0.00270619
	0.0332			0.087				0.00369699			0.00134263
	0.0403			0.092				0.00178336			0.000859149
	0.1229			0.083				0.000941463			0.00196765
	0.082			0.033				0.00228764			0.00231454
	0.0587			0.027				0.00263897			0.00157181
	0.0332			0.028				0.00206899			0.00295579
	0.0249			0.083				0.00263326			0.00146312
	0.0652			0.09				0.00330078			0.00183157
	0.0308			0.064				0.000699468			0.00249894
	0.1053			0.018				0.00351778			0.0017301
	0.078			0.038				0.00107718			0.0016885
	0.0192			0.133				0.000882357			0.0012418
	0.0573			0.075				0.00331903			0.000942856
	0.0551			0.122				0.0036885			0.00321288
	0.1398			0.006				0.000845708			0.00198858
	0.0926			0.041				0.00103329			0.00141162
	0.13			0.056				0.00116216			0.00162065
	0.1083			0.051				0.00522111			0.00204109
	0.2786			0.016				0.00364701			0.00125613
	0.0737			0.037				0.00102226			0.0059807
	0.0736			0.114				0.00266851			0.00172655
	0.0238			0.052				0.000706948			0.00249134
	0.1359			0.147				0.00123622			0.00286334
	0.1527			0.07				0.000826046			0.00192352
	0.0544			0.078				0.000930183			0.001013
	0.0383			0.012				0.00282326			0.00226305
	0.036			0.047				0.00276187			0.00211807
	0.0466			0.056				0.00118181			0.0012191
	0.0423			0.065				0.00102606			0.000801437
	0.0763			0.032				0.000949964			0.000809684
	0.1437			0.024				0.000962012			0.0008367
	0.0632			0.077				0.00152513			0.00134327
	0.0664			0.099				0.00175737			0.00094603
	0.0169			0.058				0.00142824			0.00115543
	0.0491			0.101				0.00142875			0.00119563
	0.0007			0.073				0.00270315			0.00123064
	0.0352			0.249				0.00120641			0.00102885
	0.0876			0.19				0.00452304			0.000882737
	0.0922			0.104				0.00207064			0.00653725
	0.032			0.022				0.00129849			0.00395612
	0.322			0.032				0.00107323			0.00201255
	0.0443			0.049				0.000736117			0.00677315
	0.1468			0.025				0.0019509			0.000742592
	0.0207			0.043				0.00107235			0.000873864
	0.0352			0.16				0.00334758			0.0007658
	0.0698			0.08				0.000713289			0.00129354
	0.0208			0.04				0.00465748			0.00616398
	0.0326			0.119				0.000863716			0.00396917
	0.0666			0.091				0.00149419			0.00116406
	0.0192			0.119				0.00267828			0.00108161
	0.0161			0.072				0.000719249			0.00131143
	0.0344			0.083				0.000661798			0.00136064
	0.2842			0.036				0.00115111			0.00237364
	0.0306			0.095				0.00233191			0.00249705
	0.0116			0.081				0.00109188			0.00233191
	0.1023			0.048				0.00205199			0.00330877
	0.0941			0.075				0.000809692			0.000927262
	0.1264			0.227				0.00106982			0.00115822
	0.0546			0.092				0.00120679			0.00106919
	0.0199			0.087				0.00296949			0.000941977
	0.0736			0.094				0.00203779			0.00253281
	0.1559			0.025				0.000968985			0.00115073
	0.0316			0.079				0.00434307			0.00490417
	0.272			0.096				0.00293601			0.00107971
	0.0659			0.036				0.00180367			0.000706069
	0.2895			0.045				0.000701375			0.00449501
	0.1014			0.013				0.00163776			0.0012905
	0.0874			0.226				0.00295706			0.00215042
	0.1177			0.087				0.00252431			0.000860415
	0.0336			0.079				0.00183371			0.0018932
	0.0558			0.077				0.00149851			0.00155456
	0.0207			0.058				0.00190665			0.00403259
	0.0546			0.132				0.00513792			0.00297558
	0.0749			0.054				0.000694521			0.00141657
	0.1414			0.047				0.0020289			0.00108225
	0.0436			0.043				0.00174963			0.00239012
	0.1378			0.064				0.0019211			0.000934742
	0.0319			0.118				0.00379592			0.000744492
	0.0658			0.025				0.00164957			0.000924721
	0.0412			0.098				0.00168204			0.0020052
	0.2317			0.096				0.00283289			0.00208624
	0.0907			0.119				0.00178198			0.000957951
	0.1237			0.123				0.00151322			0.000781022
	0.0356			0.103				0.00112625			0.0010149
	0.1058			0.06				0.00220381			0.00107958
	0.0303			0.384				0.00459445			0.00102302
	0.0992			0.146				0.000667386			0.00165387
	0.0944			0.325				0.00385312			0.00403132
	0.0945			0.141				0.00182078			0.00163954
	0.0562			0.039				0.00254562			0.000827059
	0.2403			0.021				0.00104889			0.000676513
	0.039			0.049				0.00123888			0.00122911
	0.0809			0.219				0.0017575			0.00369687
	0.0244			0.055				0.00105891			0.00213799
	0.0538			0.06				0.000730537			0.00121022
	0.0616			0.057				0.00323774			0.0011657
	0.0327			0.037				0.000849381			0.000746146
	0.0516			0.031				0.0039381			0.000734977
	0.015			0.027				0.000920787			0.000977226
	0.0384			0.107				0.0014592			0.0031402
	0.0722			0.052				0.00112893			0.00192288
	0.0632			0.046				0.000885271			0.0015311
	0.0651			0.034				0.000809178			0.000726104
	0.0629			0.071				0.00129379			0.00246356
	0.0258			0.071				0.00295769			0.00119804
	0.0524			0.241				0.00333083			0.00135049
	0.0592			0.016				0.00296747			0.00124028
	0.0805			0.211				0.0011619			0.00114845
	0.0388			0.185				0.00266446			0.00140364
	0.086			0.091				0.00290582			0.000856489
	0.1604			0.036				0.00134694			0.00265863
	0.1661			0.152				0.00136471			0.00174202
	0.2069			0.166				0.000698201			0.00110393
	0.0843			0.269				0.00156547			0.00135683
	0.0441			0.109				0.000782415			0.00129165
	0.0596			0.063				0.00163727			0.000861555
	0.0791			0.052				0.00178349			0.00258671
	0.1438			0.049				0.00354404			0.00129837
	0.2212			0.034				0.00271241			0.000874877
	0.183			0.026				0.00097812			0.00159401
	0.0255			0.121				0.00245608			0.00207444
	0.0745			0.081				0.00192491			0.00120311
	0.0855			0.02				0.00075274			0.000981413
	0.0357			0.025				0.00243693			0.00101198
	0.0439			0.123				0.00136178			0.00270379
	0.2991			0.072				0.00172717			0.00825834
	0.1441			0.019				0.00295579			0.00168494
	0.0406			0.017				0.00307869			0.000752993
	0.0678			0.179				0.0024212			0.00103252
	0.222			0.221				0.00564676			0.000786349
	0.0514			0.125				0.0019305			0.00148189
	0.0715			0.1				0.00150193			0.00136825
	0.0741			0.446				0.00115505			0.00104205
	0.0512			0.165				0.00170968			0.00238974
	0.0898			0.044				0.0035651			0.00255627
	0.0365			0.039				0.00256896			0.000689201
	0.1309			0.063				0.00239178			0.00252127
	0.1378			0.019				0.00153515			0.000807531
	0.0005			0.119				0.00381			0.00123673
	0.0733			0.052				0.00139564			0.00150713
	0.0949			0.087				0.000981674			0.00087437
	0.0651			0.12				0.00156915			0.000994608
	0.0542			0.087				0.00219925			0.00102022
	0.0335			0.111				0.00385997			0.000679426
	0.0612			0.039				0.000745632			0.000896573
	0.0843			0.067				0.000804737			0.000691861
	0.0413			0.122				0.00150219			0.000680827
	0.0499			0.07				0.00123736			0.00206671
	0.0199			0				0.00326373			0.00152387
	0.2717			0.1				0.000719257			0.000898339
	0.0315			0.251				0.00105587			0.00174443
	0.1357			0.102				0.00127553			0.00105498
	0.0207			0.152				0.00351461			0.00212112
	0.0471			0.056				0.00326817			0.00141302
	0.0818			0.063				0.00142292			0.00169332
	0.0776			0.076				0.000906333			0.00098332
	0.0882			0.146				0.00204046			0.00409397
	0.0944			0.206				0.00106893			0.00068184
	0.0292			0.034				0.00169344			0.00133033
	0.012			0.1				0.00103252			0.000799157
	0.1302			0.091				0.00403512			0.00250643
	0.0185			0.11				0.00083784			0.00143801
	0.0311			0.183				0.00083708			0.0011728
	0.0853			0.153				0.000917368			0.00815599
	0.0395			0.031				0.00164094			0.00247942
	0.1212			0.153				0.00393404			0.00107476
	0.1211			0.055				0.0041877			0.00590372
	0.0616			0.163				0.0028542			0.00122695
	0.0842			0.145				0.00104534			0.00185185
	0.0251			0.046				0.00370955			0.003974
	0.0405			0.097				0.00347757			0.000891872
	0.0256			0.058				0.00195877			0.0033671
	0.0167			0.036				0.000697188			0.0032305
	0.1665			0.059				0.00095427			0.00146959
	0.035			0.057				0.00234764			0.00114337
	0.044			0.036				0.0017873			0.000974439
	0.1107			0.026				0.000735998			0.00243504
	0.0277			0.106				0.000974692			0.00488565
	0.0617			0.057				0.00391324			0.00269008
	0.0326			0.015				0.00230401			0.000908867
	0.042			0.11				0.00285394			0.00119056
	0.0558			0.044				0.0060147			0.00339121
	0.0582			0.029				0.00470681			0.00221536
	0.2546			0.013				0.00283961			0.00344016
	0.1149			0.026				0.00221598			0.00105879
	0.0998			0.115				0.00300653			0.00136838
	0.0399			0.144				0.00191376			0.00160124
	0.0601			0.051				0.0025947			0.00280448
	0.0237			0.044				0.000889093			0.00742291
	0.0483			0.111				0.00116253			0.00161304
	0.0768			0.196				0.00133108			0.00128049
	0.082			0.248				0.00174469			0.00137103
	0.0749			0.084				0.00113247			0.00196931
	0.0495			0.033				0.00185946			0.00124852
	0.0253			0.044				0.00114566			0.000948183
	0.0396			0.112				0.000906199			0.00276352
	0.068			0.029				0.00239558			0.000870943
	0.0372			0.061				0.00156838			0.0012385
	0.015			0.272				0.00138943			0.00109759
	0.0482			0.045				0.00316709			0.00258761
	0.0827			0.024				0.00120921			0.00642347
	0.2095			0.043				0.00235842			0.00676504
	0.0617			0.13				0.000867009			0.00118586
	0.0597			0.029				0.000940323			0.00175052
	0.0388			0.315				0.00114071			0.000703663
	0.014			0.141				0.00105865			0.00132982
	0.1089			0.036				0.00117522			0.00257011
	0.0992			0.033				0.00120172			0.00111915
	0.1491			0.044				0.00190563			0.000746772
	0.035			0.04				0.00169218			0.000821233
	0.0103			0.106				0.000850141			0.00142583
	0.0727			0.386				0.00214522			0.00141086
	0.0001			0.081				0.0015566			0.00285573
	0.0551			0.045				0.00655209			0.0010447
	0.0723			0.029				0.00430553			0.00125943
	0.0262			0.037				0.000813238			0.00180341
	0.1223			0.054				0.00213584			0.00634751
	0			0.03				0.00182319			0.000967212
	0.0317			0.456				0.00175852			0.000819199
	0.0928			0.15				0.00217832			0.00439393
	0.0488			0.17				0.00113082			0.00284456
	0.0909			0.091				0.00140161			0.0010915
	0.0878			0.18				0.00390334			0.00162889
	0.1635			0				0.00204869			0.00184273
	0.0982			0.05				0.00146553			0.00140288
	0.0388			0.091				0.00103634			0.000663832
	0.1043			0.064				0.00372313			0.00154264
	0.0257			0.08				0.00382179			0.000857115
	0.0374			0.073				0.00524788			0.00222004
	0.0546			0.027				0.00346147			0.00107907
	0.0981			0.088				0.00512067			0.000700228
	0.4672			0.042				0.00181634			0.00138207
	0.0455			0.123				0.00198223			0.00176828
	0.0603			0.123				0.00133845			0.000907727
	0.0139			0.059				0.000908233			0.00231973
	0.0762			0.122				0.000834934			0.000655077
	0.0571			0.08				0.000739805			0.00110584
	0.0649			0.079				0.00138853			0.00105358
	0.0334			0.143				0.0025342			0.00281945
	0.1228			0.077				0.00100424			0.00123242
	0.1108			0.054				0.00455957			0.00311269
	0.0122			0.058				0.00134897			0.00141112
	0.0777			0.052				0.000956558			0.00102632
	0.0277			0.165				0.00179656			0.000692114
	0.0439			0.279				0.00210235			0.00391413
	0.0426			0.319				0.00098636			0.00163573
	0.0339			0.057				0.000871323			0.00212924
	0.0699			0.057				0.00100563			0.00120135
	0.0911			0.025				0.00128595			0.000802457
	0.0762			0.122				0.00439139			0.000662819
	0.1237			0.032				0.002442			0.00104915
	0.1027			0.036				0.000939444			0.000796497
	0.1074			0.014				0.00334782			0.00116989
	0.0646			0.086				0.00100183			0.00138968
	0.051			0.063				0.00201865			0.00105105
	0.0391			0.135				0.00155849			0.000683621
	0.0458			0.061				0.00139451			0.00106753
	0.1787			0.177				0.00120845			0.00725232
	0.0192			0.033				0.00171438			0.00148518
	0.1878			0.144				0.00123458			0.00242044
	0.0276			0.108				0.00242437			0.00173581
	0.0552			0.141				0.00120807			0.000792436
	0.0797			0.178				0.00402929			0.0016899
	0.0961			0.033				0.00179301			0.00103951
	0.0007			0.088				0.00327388			0.00103291
	0.2274			0.067				0.0017221			0.00124485
	0.4238			0.09				0.00355367			0.00156865
	0.2801			0.048				0.00225467			0.0013666
	0.052			0.236				0.0010461			0.00307464
	0.0555			0.15				0.00208066			0.00357448
	0.2287			0.055				0.00129545			0.00518548
	0.0905			0.032				0.000668772			0.00178412
	0.0727			0.117				0.00220849			0.00139006
	0.0599			0.099				0.00133146			0.00138448
	0.0552			0.097				0.00257391			0.00139882
	0.0192			0.075				0.000897579			0.00132424
	0.028			0.144				0.00151803			0.00108415
	0.1783			0.036				0.00164283			0.00249869
	0.0811			0.073				0.000738285			0.00157993
	0.0575			0.024				0.00356369			0.00177487
	0.2254			0.048				0.000670291			0.0084321
	0.1156			0.056				0.0041768			0.00789523
	0.045			0.028				0.000845574			0.00240776
	0.0348			0.106				0.00528327			0.00141467
	0.0345			0.037				0.00109467			0.000880457
	0.0428			0.188				0.00321453			0.00138664
	0.0175			0.07				0.00825986			0.000946544
	0.0393			0.068				0.00303645			0.000723816
	0.036			0.091				0.00176004			0.00190513
	0.0337			0.141				0.000664331			0.00165857
	0.0279			0.025				0.00127414			0.00146832
	0.0297			0.092				0.00388762			0.00168596
	0.0208			0.198				0.00153592			0.000683241
	0.017			0.041				0.00267372			0.000943996
	0.0325			0.008				0.0011539			0.00332982
	0.0113			0.085				0.000856988			0.0024486
	0.0777			0.04				0.0019764			0.00155266
	0.0452			0.112				0.00247345			0.000765681
	0.0247			0.16				0.00215803			0.00094831
	0.0219			0.037				0.0035897			0.00666015
	0.0439			0.189				0.00273193			0.00166516
	0.3416			0.107				0.00190132			0.000884898
	0.0471			0.065				0.00252965			0.00250593
	0.0459			0.139				0.00318003			0.00223286
	0.011			0.08				0.00364904			0.00114085
	0.0237			0.025				0.00167544			0.00230147
	0.011			0.067				0.000850908			0.00127376
	0.0119			0.048				0.00135911			0.00103456
	0.0272			0.09				0.00118828			0.00131156
	0.0706			0.074				0.00123128			0.00190842
	0.0103			0.143				0.00171146			0.000983067
	0.1031			0.039				0.00087551			0.00203323
	0.0642			0.095				0.00123622			0.00104014
	0.0254			0.094				0.000984333			0.000992194
	0.0612			0.095				0.00103697			0.000984974
	0.0368			0.245				0.00187583			0.00172299
	0.0653			0.066				0.00301705			0.00186783
	0.0549			0.032				0.00366529			0.00148062
	0.0427			0.038				0.00343661			0.00634015
	0.2038			0.017				0.0011222			0.00149483
	0.0373			0.335				0.00151651			0.00120249
	0.0708			0.051				0.00112841			0.00127769
	0.1436			0.128				0.00141797			0.00257898
	0.0893			0.159				0.00169649			0.00237631
	0.0452			0.082				0.00156902			0.00682198
	0.0326			0.031				0.00522442			0.00107718
	0.0156			0.045				0.00134872			0.00833051
	0.0324			0.062				0.00372287			0.00180404
	0.0499			0.059				0.0041026			0.000995114
	0.0252			0.332				0.00348506			0.00200025
	0.0404			0.088				0.00135886			0.00180379
	0.0463			0.079				0.000871465			0.00539133
	0.0576			0				0.000831001			0.0011572
	0.0226			0.218				0.00116596			0.0010891
	0.02			0.045				0.00211667			0.00149217
	0.0256			0.11				0.00204388			0.000716977
	0.0241			0.267				0.00134961			0.00495402
	0.0345			0.048				0.000884637			0.00287943
	0.0395			0.043				0.0011038			0.000903286
	0.0391			0.034				0.000789896			0.0022066
	0.0105			0.024				0.00127465			0.00156129
	0.0748			0.05				0.00187582			0.00107032
	0.0693			0.013				0.00125169			0.000735112
	0.0314			0.109				0.00227255			0.00177982
	0.094			0.013				0.00180417			0.00111877
	0.027			0.039				0.000756666			0.00106499
	0.042			0.031				0.00190183			0.000921935
	0.1253			0.092				0.00148151			0.00202993
	0.0432			0.01				0.00145019			0.0035018
	0.0589			0.027				0.00156447			0.000785217
	0.0257			0.044				0.00193202			0.00401407
	0.2287			0.008				0.00168723			0.00181558
	0.0682			0.025				0.0014668			0.0018913
	0.0325			0.034				0.00132183			0.00157029
	0.0407			0.016				0.00108148			0.0018918
	0.0647			0.017				0.000822119			0.00362115
	0.0658			0.049				0.00203652			0.00179846
	0.0428			0.035				0.00512562			0.000813745
	0.0322			0.054				0.00513906			0.000731818
	0.1101			0.043				0.00190462			0.00118156
	0.0216			0.202				0.00192047			0.000945516
	0.0523			0.054				0.00106855			0.00146211
	0.0258			0.124				0.00159591			0.00134339
	0.2428			0.141				0.00193302			0.00287868
	0.0748			0.213				0.000710376			0.00183714
	0.0841			0.044				0.000802964			0.000894278
	0.038			0.037				0.00146858			0.00763661
	0.0855			0.031				0.00266091			0.00180594
	0.052			0.075				0.00156318			0.0010844
	0.087			0.024				0.00388382			0.00133324
	0.018			0.023				0.00402422			0.000986993
	0.2621			0.053				0.00320121			0.00163852
	0.1273			0.167				0.000927128			0.00176599
	0.0536			0.214				0.00099498			0.000847489
	0.1058			0.064				0.00202549			0.000814632
	0.1214			0.127				0.00430883			0.00348619
	0.0903			0.129				0.00199657			0.00210019
	0.1145			0.034				0.00166605			0.00115746
	0.1959			0.198				0.00213431			0.00152984
	0.0902			0.096				0.00155875			0.00643832
	0.0256			0.036				0.00389142			0.000894018
	0.1326			0.027				0.00241803			0.000981927
	0.0774			0.259				0.00135659			0.00150637
	0.0761			0.142				0.00170296			0.00112588
	0.1133			0.011				0.000853315			0.00194863
	0.12			0.069				0.00110938			0.000960737
	0.0493			0.151				0.00130318			0.00122417
	0.1768			0.218				0.00316101			0.00152602
	0.035			0.131				0.00150345			0.00294578
	0.0152			0.115				0.000899866			0.00200747
	0.2784			0.118				0.00134935			0.000893265
	0.0248			0.075				0.00424033			0.00144561
	0.1305			0.227				0.0033543			0.000815272
	0.0746			0.129				0.00166757			0.00310203
	0.0184			0.069				0.000678673			0.00148012
	0.1532			0.115				0.00157397			0.00298636
	0.0745			0.141				0.00140059			0.00245062
	0.0498			0.481				0.00107033			0.00175089
	0.0432			0.03				0.00333274			0.00131511
	0.0635			0.053				0.000752747			0.00217883
	0.0751			0.077				0.00333349			0.000894032
	0.0262			0.036				0.00121149			0.00130838
	0.2494			0.298				0.00170232			0.00107413
	0.0729			0.036				0.00406455			0.00165577
	0.0689			0.105				0.00082542			0.00397323
	0.045			0.047				0.00330026			0.00113931
	0.0374			0.055				0.000965178			0.00124966
	0.0539			0.039				0.00123686			0.0011846
	0.1648			0.112				0.000666365			0.000727117
	0.0981			0.076				0.00259078			0.000951484
	0.0193			0.041				0.00140668			0.00118752
	0.0435			0.027				0.00307616			0.00467879
	0.0357			0.182				0.00196815			0.0014857
	0.051			0.187				0.000742212			0.00104153
	0.0467			0.135				0.00215587			0.000894032
	0.037			0.022				0.00130218			0.000923194
	0.0896			0.047				0.00150346			0.00238594
	0.0346			0.103				0.00296416			0.00302669
	0.0405			0.057				0.00293119			0.00153136
	0.0283			0.037				0.00148164			0.000897452
	0.048			0.024				0.00519499			0.00145018
	0.0199			0.043				0.00133591			0.00125804
	0.1548			0.143				0.0016663			0.0010981
	0.0676			0.05				0.00184704			0.00108694
	0.0603			0.109				0.0030017			0.00132348
	0.0445			0.225				0.00178286			0.0102218
	0.0493			0.221				0.0041872			0.000662439
	0.0494			0.042				0.00376066			0.000714436
	0.0458			0.035				0.000844948			0.00368064
	0.1735			0.201				0.00106259			0.00399873
	0.0728			0.073				0.00399099			0.00134338
	0.1334			0.266				0.000888951			0.001697
	0.0893			0.036				0.000765167			0.000744753
	0.0798			0.032				0.000947423			0.00562178
	0.1368			0.131				0.00658125			0.00148176
	0.0577			0.263				0.0051837			0.00110634
	0.0761			0.13				0.00345627			0.00171907
	0.1588			0.056				0.0028495			0.00183448
	0.1529			0.12				0.00142037			0.00172947
	0.128			0.039				0.00113082			0.000759713
	0.0498			0.038				0.00319995			0.0017093
	0.0492			0.131				0.000676014			0.00083112
	0.0166			0.054				0.00158006			0.00149609
	0.0937			0.161				0.00325969			0.001143
	0			0.083				0.000844695			0.00246508
	0.0424			0.089				0.000806764			0.00174203
	0.0806			0.168				0.0012957			0.00102365
	0.0315			0.231				0.00159173			0.00222221
	0.0382			0.085				0.00288476			0.00248652
	0.0451			0.335				0.00403322			0.00361671
	0.0514			0.012				0.00161646			0.00530571
	0.0165			0.166				0.00225378			0.00124599
	0.1827			0.261				0.00197983			0.000867397
	0.0711			0.053				0.0011104			0.00145843
	0.0259			0.113				0.00452419			0.00167911
	0.0568			0.024				0.00344168			0.00123128
	0.0905			0.154				0.0022222			0.00249413
	0.1192			0.073				0.000929795			0.00108123
	0.0512			0.042				0.00113487			0.00596029
	0.1102			0.399				0.00250478			0.00307096
	0.1024			0.066				0.00136026			0.00196208
	0.0196			0.026				0.00842779			0.00114541
	0.0356			0.037				0.0014881			0.00105637
	0.1867			0.176				0.00300449			0.000811592
	0.0229			0.012				0.000773914			0.00255881
	0.0691			0.113				0.00418162			0.00207064
	0.0558			0.024				0.00216994			0.00110825
	0.0246			0.047				0.00131448			0.00528771
	0.1386			0.513				0.000963792			0.00190107
	0.0598			0.096				0.00171767			0.0028211
	0.2123			0.043				0.0009804			0.00106094
	0.1581			0.031				0.00351424			0.000800431
	0.0496			0.034				0.00100209			0.00180671
	0.0175			0.019				0.00300513			0.00117661
	0.0441			0.017				0.00158361			0.00196017
	0.1811			0.068				0.00256743			0.00138182
	0.0606			0.039				0.000857502			0.000871584
	0.0383			0.035				0.000879951			0.00165616
	0.0024			0.048				0.00535417			0.000952631
	0.0704			0.116				0.00379529			0.00162635
	0.0316			0.062				0.00078623			0.000751473
	0.0496			0.012				0.000901267			0.0012508
	0.0549			0.28				0.00340452			0.00929214
	0.0331			0.049				0.00293893			0.00102644
	0.0728			0.055				0.00291775			0.00331245
	0.0386			0.197				0.00204743			0.00137041
	0.1929			0.065				0.00132005			0.00745703
	0.0378			0.105				0.00258951			0.0013595
	0.0152			0.193				0.00142558			0.0068249
	0.2203			0.155				0.00143306			0.00144727
	0.1508			0.029				0.00145729			0.0040298
	0.032			0.074				0.00157917			0.0015259
	0.0891			0.178				0.00117394			0.000981033
	0.0658			0.144				0.00178552			0.00452635
	0.1103			0.126				0.00199822			0.00216894
	0.0254			0.248				0.00319386			0.00140072
	0.0504			0.029				0.00194584			0.00218467
	0.0401			0.131				0.00147048			0.00110761
	0.0526			0.06				0.0013089			0.000915088
	0.1035			0.052				0.00180061			0.000934236
	0.0363			0.019				0.00126906			0.00174582
	0.071			0.185				0.00192744			0.000705056
	0.0593			0.133				0.00227217			0.00407508
	0.1493			0.217				0.00182129			0.001472
	0.0602			0.195				0.00398642			0.000823639
	0.0691			0.013				0.000799917			0.00094983
	0.0263			0.041				0.00133464			0.00144891
	0.0736			0.064				0.00074932			0.00103024
	0.1613			0.106				0.00100589			0.00295541
	0.1157			0.136				0.00139412			0.00106829
	0.0374			0.093				0.00136901			0.00225137
	0.1872			0.196				0.00224034			0.000927009
	0.0697			0.236				0.000780895			0.00078737
	0.0242			0.028				0.00124092			0.00120984
	0.03			0.218				0.00158145			0.0025186
	0.0484			0.143				0.00201661			0.00120097
	0.247			0.062				0.00799035			0.000870436
	0.0546			0.1				0.00108808			0.00131624
	0.0497			0.041				0.000933342			0.00181114
	0.0668			0.051				0.000744872			0.00117332
	0.0883			0.019				0.000786476			0.0012281
	0.0532			0.165				0.00353478			0.00174811
	0.0383			0.031				0.00147948			0.000899225
	0.0317			0.179				0.00132297			0.00321719
	0.0858			0.043				0.000909112			0.00140135
	0.1001			0.021				0.00160657			0.00112181
	0.0597			0.143				0.00147872			0.000826053
	0.0742			0.022				0.000747159			0.000949331
	0.1755			0.078				0.00414788			0.00292611
	0.205			0.06				0.00106271			0.0016332
	0.1336			0.119				0.00111852			0.0035519
	0.0261			0.255				0.0016521			0.00115454
	0.0739			0.114				0.0012489			0.000910267
	0.027			0.087				0.00587595			0.00101338
	0.0828			0.054				0.000814892			0.000721917
	0.0223			0.076				0.00278711			0.00188229
	0.2026			0.063				0.00100336			0.00124535
	0.0626			0.052				0.0024155			0.00143103
	0.212			0.112				0.00280474			0.000971399
	0.086			0.073				0.00184272			0.00138601
	0.0565			0.02				0.00174455			0.00128936
	0.0654			0.22				0.000854723			0.00102606
	0.0388			0.095				0.000780769			0.00242133
	0.0433			0.291				0.00111699			0.00165577
	0.1823			0.095				0.00105169			0.00147745
	0.0254			0.089				0.00117864			0.00105587
	0.3869			0.434				0.00179681			0.000868656
	0.0867			0.046				0.00147682			0.00273561
	0.1385			0.06				0.00127731			0.00349292
	0.0363			0.035				0.00112359			0.00270149
	0.1674			0.16				0.0021565			0.000700742
	0.0009			0.352				0.00133426			0.000728011
	0.0098			0.045				0.00112169			0.000997774
	0.1751			0.09				0.000863835			0.00158361
	0.0712			0.111				0.00341352			0.00192199
	0.1021			0.076				0.00331498			0.000662059
	0.0608			0.194				0.00139666			0.000819705
	0.1718			0.034				0.00359349			0.00621649
	0.0348			0.048				0.0024486			0.00333083
	0.1403			0.296				0.000921808			0.00131663
	0.0961			0.072				0.00151233			0.00287729
	0.0299			0.068				0.00109176			0.000758573
	0.0761			0.011				0.000729524			0.00224072
	0.038			0.186				0.000925735			0.000799805
	0.1622			0.165				0.000786476			0.000742845
	0.1622			0.047				0.00203577			0.00312182
	0.181			0.222				0.00339007			0.0010305
	0.0347			0.235				0.000754893			0.000962391
	0.132			0.091				0.00167709			0.00262769
	0.0355			0.051				0.00199124			0.00160099
	0.048			0.16				0.00245152			0.00131739
	0.0543			0.154				0.00127693			0.00335595
	0.0298			0.053				0.0013907			0.00160543
	0.0458			0.055				0.00107273			0.0013836
	0.0478			0.095				0.00387342			0.00094413
	0.0955			0.263				0.00218505			0.00264696
	0.0346			0.032				0.000980273			0.000965945
	0.023			0.116				0.00130495			0.00126183
	0.1824			0.094				0.00252824			0.00392732
	0.0395			0.054				0.00222651			0.00404704
	0.0598			0.055				0.00154505			0.00183664
	0.0387			0.07				0.00211808			0.00105916
	0.0416			0.14				0.000918627			0.00206341
	0.1109			0.268				0.00241042			0.00149255
	0.0381			0.342				0.00351258			0.00155837
	0.1112			0.059				0.00425657			0.00212137
	0.0859			0.08				0.00106347			0.00117496
	0.0399			0.436				0.00353071			0.00110356
	0.1867			0.543				0.0014025			0.00122113
	0.0283			0.048				0.00146832			0.00247574
	0.081			0.217				0.00158158			0.000971012
	0.0236			0.112				0.000685275			0.00220622
	0.0731			0.063				0.00114604			0.00302542
	0.0344			0.037				0.00179529			0.00810703
	0.0361			0.343				0.00079117			0.00167722
	0.1403			0.025				0.00300031			0.000998415
	0.0997			0.403				0.00256858			0.00383233
	0.0266			0.413				0.00301363			0.000784703
	0.06			0.258				0.00226203			0.00130153
	0.2066			0.382				0.00167645			0.00100132
	0.0048			0.712				0.00152298			0.00103342
	0.1422			0.173				0.000916101			0.000956297
	0.0261			0.409				0.00116178			0.00113311
	0.0438			0.083				0.00145081			0.000860162
	0.0599			0.017				0.0014791			0.00132982
	0.0306			0.314				0.000803851			0.000999048
	0.086			0.059				0.0021839			0.0011851
	0.0192			0.262				0.00428143			0.00731282
	0.0329			0.702				0.00086689			0.00123432
	0.0351			0.009				0.000915214			0.000885278
	0.0259			0.44				0.000948571			0.00189219
	0.0565			0.067				0.00299168			0.000830367
	0.0308			0.527				0.00090684			0.001793
	0			0.335				0.00370004			0.00150181
	0.093			0.24				0.000709616			0.00131384
	0.0595			0.342				0.00195929			0.00237237
	0.0778			0.37				0.00447713			0.00122227
	0.0506			0.01				0.00172921			0.00194952
	0.0206			0.405				0.00136317			0.00364906
	0.007			0.066				0.0018502			0.001325
	0.0517			0.106				0.00323597			0.00205846
	0.0313			0.209				0.00241715			0.000747792
	0.0527			0.164				0.000907592			0.00580847
	0.0588			0.55				0.00153757			0.00148024
	0.0164			0.775				0.00224098			0.000855215
	0.0573			1.55				0.00124637			0.00238353
	0.0795			0.237				0.00234155			0.000718623
	0.0233			0				0.000855476			0.00202943
	0.0373			2.304				0.00207381			0.00592529
	0.0266			0.072				0.00087069			0.000989527
	0.0555			0.059				0.0035278			0.00178426
	0.0984			0.001				0.00182472			0.00143331
	0.023			0.293				0.0009128			0.00100983
	0.0707			0.486				0.000860162			0.00173087
	0.0443			0.025				0.00246242			0.0020081
	0.0319			0.291				0.00306194			0.00111052
	0.1055			0.267				0.00142519			0.00173593
	0.0484			0.02				0.0016403			0.000719257
	0.1143			0.02				0.00142558			0.00132119
	0.0276			0.128				0.00311179			0.000971526
	0.1673			0.737				0.00148215			0.00134085
	0.099			0.011				0.00127959			0.00172947
	0.0842			0.011				0.00483428			0.00226697
	0.1073			0.918				0.00123431			0.00155026
	0.0607			0.369				0.00155951			0.00279751
	0.0832			0.876				0.000975072			0.00280207
	0.0213			0.277				0.00227141			0.00117293
	0.0372			0.157				0.00179072			0.0011307
	0.0327			0.013				0.00248689			0.00147124
	0.0541			0.327				0.00156636			0.000850528
	0.0335			0.148				0.0019381			0.00251289
	0.0898			0.316				0.00193556			0.00811553
	0.1104			0.013				0.00177728			0.000659779
	0.0897			0.092				0.00188585			0.000983447
	0.0508			2.018				0.000851035			0.00131105
	0.0304			0				0.00200329			0.000825658
	0.0507			0.055				0.00148253			0.00083784
	0.3288			0.432				0.00130268			0.00159846
	0.257			0.167				0.00217896			0.00101452
	0.0229			0.614				0.000666246			0.00167049
	0.2794			0.363				0.00154835			0.00127161
	0.0638			0.077				0.000814885			0.00286029
	0.0143			0.079				0.00245164			0.000784948
	0.0541			0.24				0.00133071			0.00117471
	0.0295			0.067				0.000863969			0.00104953
	0.1463			1.121				0.00157624			0.00123101
	0.0629			1.018				0.0035245			0.0017041
	0.1992			0.116				0.00121567			0.00131854
	0.0366			0.124				0.00102404			0.000775568
	0.0786			0.027				0.00293601			0.00151753
	0.1096			0.991				0.00152095			0.00523989
	0.0337			0.079				0.000791684			0.000924975
	0.1404			0.172				0.000897706			0.00249641
	0.0306			0.19				0.00228892			0.00153799
	0.0451			0.13				0.00109201			0.00123783
	0.3626			0.395				0.00281514			0.000993088
	0.0537			0.274				0.000857368			0.00153735
	0.0577			0.522				0.00110951			0.00202595
	0.1564			0.439				0.0038043			0.000716954
	0.0488			0.058				0.00297127			0.00105294
	0.0289			0.012				0.000882745			0.000703737
	0.0361			0.485				0.0040525			0.00224071
	0.1171			0.576				0.000762507			0.000926249
	0.0897			0.409				0.000887305			0.000929669
	0.0657			0.271				0.0009804			0.00184652
	0.09			0.785				0.000920162			0.00167052
	0.062			0.144				0.00125106			0.00291662
	0.0555			0.548				0.00302884			0.000946835
	0.2189			0.221				0.00113527			0.00336163
	0.0326			0.011				0.00071951			0.0005088
	0.0913			0.212				0.00253294			0.000846565
	0.0516			0.223				0.00173277			0.000847973
	0.0435			0.456				0.00133324			0.00069052
	0.0255			0.568				0.00373644			0.00295054
	0.1252			0.684				0.00137118			0.00169047
	0.1556			0.362				0.00117788			0.000767909
	0.1217			1.161				0.000788637			0.00194971
	0.0235			0.058				0.00175636			0.00332186
	0.0362			0.148				0.00194216			0.000741489
	0.086			0.533				0.000973053			0.00253235
	0.0585			0.68				0.00125144			0.000595853
	0.0968			0.539				0.00125055			0.000537522
	0.0355			0.129				0.00212455			0.00230018
	0.0796			0.414				0.00200633			0.000641853
	0.0209			0.34				0.00147035			0.00102155
	0.0493			0.926				0.00170663			0.00113935
	0.0357			0.044				0.00105028			0.00118027
	0.1829			0.278				0.00283632			0.000883676
	0.0832			0.204				0.00194723			0.000603981
	0.0602			0.442				0.00239038			0.00392915
	0.0915			0.099				0.00327097			0.00166912
	0.1102			0.613				0.00212555			0.00114799
	0.0475			0.127				0.00363409			0.00298282
	0.3898			0.167				0.00134099			0.0076222
	0.0306			0.796				0.001931			0.000941493
	0.0264			0.616				0.0038705			0.00274328
	0.0616			0.02				0.00250795			0.0028795
	0.0336			0.292				0.00287627			0.000838056
	0.0227			0.07				0.000983827			0.00124584
	0.0442			0.021				0.000739545			0.00423857
	0.0437			1.149				0.00362939			0.00200535
	0.0274			0.001				0.00215524			0.000508673
	0.1638			0.033				0.00256997			0.000472836
	0.0241			0.476				0.00141302			0.00132691
	0.0308			0.198				0.00182801			0.00145131
	0.0911			0.084				0.000766441			0.00188477
	0.0175			0.027				0.00326932			0.00243513
	0.2543			0.562				0.00133692			0.000979364
	0.0477			0.084				0.0014777			0.000673749
	0.0738			0.974				0.00408053			0.000980757
	0.0648			0.12				0.00213963			0.000723556
	0.1141			0.123				0.00143813			0.000993967
	0.0466			0.889				0.0033321			0.000512101
	0.0404			0.075				0.0055004			0.000998043
	0.245			0.46				0.00210019			0.00724237
	0.0008			1.01				0.00215232			0.00631562
	0.0236			0.024				0.00366034			0.00132767
	0.1326			0.653				0.0108619			0.00133796
	0.1303			0.471				0.00505066			0.00244288
	0.0531			0.192				0.00132754			0.00181729
	0.0111			0.595				0.00218504			0.00269525
	0.0467			0.232				0.00139134			0.00109793
	0.0266			0.136				0.00250541			0.00190447
	0.1559			0.38				0.00203017			0.00238659
	0.0414			0.245				0.00178134			0.00145933
	0.2333			1.719				0.00130864			0.000949875
	0.2907			0.038				0.00188014			0.00146111
	0.2059			0.001				0.00180671			0.00200866
	0.125			0.075				0.00353161			0.00214286
	0.0408			0.173				0.00562951			0.00539152
	0.2373			0.238				0.00265152			0.00116298
	0.0253			0.052				0.00119005			0.00122537
	0.0117			0.542				0.00190374			0.000935651
	0.0324			0.36				0.00208649			0.00195529
	0.0455			0.362				0.000812344			0.00116375
	0.0003			0.202				0.000861421			0.00104671
	0.0436			0.886				0.00401889			0.00218683
	0.0212			0.17				0.00116456			0.00131699
	0.0216			0.675				0.00175267			0.000847585
	0.0375			0.232				0.000815779			0.00248215
	0.022			0.705				0.00152589			0.00134267
	0.0803			0.273				0.005178			0.0027767
	0.0224			0.552				0.00381546			0.00499162
	0.1351			0.017				0.00198211			0.00257733
	0.0334			1.28				0.00103963			0.00147521
	0.0265			0.391				0.00180543			0.00149579
	0.0349			0.375				0.00124992			0.001233
	0.0685			0.264				0.00145323			0.000815563
	0.0261			0.139				0.000864476			0.00293885
	0.0756			0.034				0.00236653			0.00117302
	0.0955			0.148				0.00117382			0.000467502
	0.0934			0.153				0.00193468			0.000824332
	0.0577			0.113				0.00360859			0.00115129
	0.1535			0.657				0.0024987			0.00138333
	0.1482			1.901				0.00199696			0.00138854
	0.0496			0.045				0.00136508			0.00185707
	0.0384			0.027				0.00140376			0.00201413
	0.0594			0.031				0.00167403			0.000830941
	0.1154			0.461				0.000799283			0.0029339
	0.0333			0.808				0.00357535			0.00147965
	0.0262			0.837				0.0015391			0.00113859
	0.1767			1.579				0.00200798			0.00107428
	0.0381			0.194				0.0010409			0.00170916
	0.1029			0.555				0.00396004			0.0018525
	0.0506			0.202				0.00250211			0.00166608
	0.1389			0.321				0.00144751			0.00331753
	0.1365			0.077				0.00120857			0.000800058
	0.145			0.73				0.00320552			0.0015803
	0.0558			0.42				0.00125994			0.00104848
	0.1377			0.201				0.00152869			0.00174537
	0.1551			0.257				0.00455474			0.000652649
	0.2009			0.758				0.00376701			0.00166125
	0.0736			0.202				0.00202878			0.000626475
	0.0137			0.633				0.00400241			0.00168247
	0.068			0.028				0.00293347			0.00122982
	0.0336			0.064				0.00100919			0.00101291
	0.1098			0.241				0.00256921			0.002136
	0.1359			0.174				0.00256668			0.000464581
	0.0436			0.088				0.00135101			0.00290315
	0.0089			0.091				0.00109734			0.0020769
	0.0511			0.01				0.00110926			0.00158589
	0.1014			0.148				0.00259926			0.00315818
	0.0689			0.166				0.00420279			0.00248265
	0.074			0.143				0.000857122			0.00109182
	0.1099			0.023				0.00118764			0.00159059
	0.0278			1.101				0.0013236			0.0011565
	0.0705			0.383				0.0023872			0.00119565
	0.1782			0.18				0.00139412			0.000787355
	0.0171			0.481				0.00295009			0.000952289
	0.0727			0.43				0.00146578			0.00145768
	0.0488			0.583				0.00141682			0.00155018
	0.0146			0.063				0.000864983			0.000739954
	0.0465			0.137				0.000792436			0.00121521
	0.0271			1.177				0.0010135			0.00433871
	0.0899			0.106				0.00138181			0.00214794
	0.0368			0.289				0.0049549			0.00131688
	0.1517			0.113				0.00297064			0.00294051
	0.1212			0.216				0.00239597			0.00481104
	0.0224			0.317				0.00221434			0.00217869
	0.0436			0.059				0.00414293			0.00445701
	0.1892			0.664				0.00110444			0.00160165
	0.0308			0.058				0.00462566			0.00096564
	0.065			0.167				0.0011827			0.00255039
	0.1247			0.101				0.00227053			0.00214362
	0.0319			0.169				0.00128771			0.00286667
	0.0184			0.921				0.00108478			0.00252523
	0.0724			0.05				0.00250554			0.00122297
	0.0823			0.372				0.00224794			0.00343013
	0.0867			0.08				0.00119995			0.00288231
	0.0293			0.001				0.0012281			0.00139324
	0.0636			0.115				0.00116658			0.0023003
	0.0527			0.03				0.000988528			0.00168081
	0.0492			0.048				0.00419912			0.000847466
	0.0545			0.196				0.00276466			0.000659384
	0.0648			0.31				0.00315048			0.00119501
	0.0631			0.987				0.00178932			0.00105167
	0.0344			0.242				0.00160656			0.00122207
	0.1809			0.562				0.00220826			0.00199926
	0.0361			0.14				0.00369179			0.00246994
	0.1116			0.2				0.00539716			0.000872232
	0.1433			0.348				0.00156534			0.00190777
	0.0399			0.054				0.00142203			0.00168018
	0.0411			0.148				0.00133654			0.000831194
	0.0594			0.683				0.00156344			0.00278916
	0.1389			0.072				0.00156662			0.00173736
	0.1073			0.028				0.000956424			0.00109322
	0.082			0.503				0.00119753			0.00190053
	0.0677			0.034				0.00383206			0.00305767
	0.0543			1.152				0.00389408			0.000956498
	0.0677			0.031				0.000934362			0.00288447
	0.0375			0.185				0.00123369			0.00201083
	0.0289			0.012				0.000663832			0.00207652
	0.1897			0.016				0.000926755			0.000827625
	0.0487			0.112				0.000919901			0.00193547
	0.0356			0.122				0.00114705			0.000746302
	0.1509			0.101				0.000853695			0.000878334
	0.0429			0.056				0.000969499			0.00133314
	0.0958			0.251				0.00163904			0.0025852
	0.0971			0.021				0.00693182			0.00136262
	0.0236			0.326				0.000896946			0.000676915
	0.083			0.084				0.000857249			0.000829794
	0.0784			0.309				0.00170587			0.000676163
	0.1751			0.603				0.00411503			0.00116641
	0.1268			0.224				0.000670932			0.00264607
	0.0513			0.104				0.000776328			0.000682645
	0			0.07				0.000808284			0.00222722
	0.0974			0.238				0.00252875			0.000465095
	0.0207			0.438				0.00094603			0.00169796
	0.2376			0.026				0.00104597			0.00142311
	0.0249			0.143				0.00177043			0.00215518
	0.0896			0.307				0.00100869			0.0015963
	0.1963			0.165				0.0038516			0.00270668
	0.0676			0.688				0.00190285			0.00196114
	0.0158			0.228				0.00278141			0.00110911
	0.0254			0.135				0.00171641			0.00256944
	0.0285			0.652				0.00193088			0.0019445
	0.0755			0.184				0.000856489			0.00159492
	0.0883			0.723				0.00118562			0.00147076
	0.035			0.664				0.000874244			0.00207093
	0.0823			0.288				0.00202079			0.003507
	0.0356			1.47				0.00263327			0.0018239
	0.0412			0.0228				0.000856496			0.000673749
	0.1444			0.0259				0.00232138			0.00423006
	0.1842			0.1552				0.00153643			0.00195161
	0.0665			0.014				0.000668272			0.00207805
	0.0625			0.0187				0.00424071			0.000890538
	0.0472			0.0945				0.00108009			0.000689507
	0.0406			0.0659				0.00456274			0.00131891
	0.1259			0.079				0.00141036			0.00509239
	0.0898			0.0184				0.000840507			0.00191413
	0.2582			0.0368				0.00353021			0.00131586
	0.0006			0.0281				0.00107299			0.00238595
	0.1041			0.0459				0.00371361			0.00159097
	0.0648			0.01				0.00075946			0.00174677
	0.0368			0.0694				0.00205555			0.00264302
	0.0624			0.0247				0.00123711			0.00250871
	0.1028			0.0269				0.00663541			0.00139502
	0.0938			0.0577				0.00190792			0.000695862
	0.0657			0.0416				0.000731811			0.00124609
	0.093			0.0614				0.00125524			0.00113972
	0.2573			0.0688				0.00628638			0.00144026
	0.0951			0.0131				0.0077968			0.00143786
	0.0926			0.0287				0.00272826			0.00145183
	0.0606			0.0198				0.00720185			0.00140799
	0.1			0.0097				0.00287386			0.00100261
	0.0389			0.0377				0.00269693			0.00141917
	0.1054			0.1234				0.00349141			0.00188693
	0.03			0.0226				0.0032683			0.00439768
	0.1305			0.0384				0.000996888			0.000759274
	0.0374			0.0252				0.00369255			0.00214477
	0.033			0.0607				0.000915974			0.00273871
	0.1147			0.0495				0.0028504			0.0010265
	0.0908			0.1451				0.00301933			0.00207589
	0.0314			0.0649				0.00253611			0.00243729
	0.0607			0.0464				0.000813238			0.00203548
	0.0716			0.0418				0.00296544			0.00109589
	0.0533			0.064				0.00340338			0.00129566
	0.2597			0.0013				0.0011151			0.00147267
	0.0732			0.0256				0.00186504			0.00245877
	0.062			0.033				0.00470974			0.00439106
	0.0377			0.1157				0.00285484			0.00268953
	0.0419			0.0534				0.00138652			0.00135411
	0.0546			0.0223				0.0041801			0.000999957
	0.0894			0.0272				0.00164843			0.00115003
	0.0198			0.0506				0.00199772			0.00170255
	0.0765			0.0197				0.00160111			0.00105802
	0.1174			0.0345				0.0019135			0.00145069
	0.0596			0.0911				0.00162648			0.00145119
	0.1144			0.0506				0.00157791			0.00211884
	0.0001			0.0575				0.00243465			0.00049419
	0.1055			0.0275				0.000831254			0.000962332
	0.1234			0.0363				0.00151867			0.000598773
	0.0915			0.1118				0.0011794			0.00232127
	0.0361			0.0371				0.000756927			0.00349722
	0.0641			0.0334				0.00487766			0.00155336
	0.0297			0.0157				0.00212809			0.00309135
	0.0372			0.0204				0.000799291			0.00130761
	0.202			0.0266				0.00357486			0.00089778
	0.0197			0.0284				0.000686914			0.000541717
	0.0273			0.0226				0.00100386			0.00108166
	0.3348			0.0047				0.00100983			0.00281635
	0.164			0.0325				0.00171184			0.00110047
	0.0433			0.0549				0.00130142			0.00285067
	0.0727			0.0296				0.00384386			0.00052049
	0.0465			0.0825				0.00160605			0.0021623
	0.2363			0.0586				0.00115683			0.00482591
	0.0392			0.0541				0.00122329			0.00135144
	0.968989			0.0752				0.00259586			0.00280529
	0.68705			0.0913				0.00625973			0.00199443
	0.42567			0.0741				0.00225201			0.00115892
	0.20354			0.0375				0.0029369			0.000985079
	0.57742			0.051				0.000979394			0.000784174
	0.88612			0.0333				0.0012276			0.00121471
	0.27325			0.0188				0.0022397			0.00102803
	0.08581			0.0215				0.00115111			0.0024439
	0.24611			0.0358				0.00189903			0.00157483
	0.68573			0.0448				0.00203285			0.00135119
	0.03735			0.0409				0.000704169			0.000924215
	0.01805			0.042				0.00171462			0.000791803
	0.12483			0.0946				0.000734985			0.00165401
	0.08604			0.106				0.000920027			0.00294623
	0.13218			0.0502				0.00103405			0.00127659
	0.68758			0.0306				0.00170574			0.00100885
	0.78057			0.0484				0.00112727			0.000943407
	0.13044			0.0797				0.0044255			0.00113451
	0.55341			0.0328				0.00222461			0.00197283
	0.27672			0.0304				0.00220737			0.00137699
	0.15938			0.0554				0.00144828			0.000789642
	0.61037			0.0148				0.00268552			0.00397932
	0.06467			0.0583				0.00137979			0.00269731
	0.16702			0.0936				0.000931188			0.00449502
	0.17374			0.028				0.00331219			0.004814
	0.03354			0.0412				0.00160073			0.00256363
	1.96578			0.0571				0.00154708			0.000722431
	0.4282			0.0312				0.00233458			0.00579681
	0.0907			0.0899				0.00124168			0.00389332
	0.668			0.0544				0.00165919			0.00187899
	0.0867			0.0374				0.00108352			0.00192402
	0.0674			0.0279				0.000794716			0.000976592
	0.5439			0.0468				0.00153236			0.00205061
	0.5156			0.0504				0.000860028			0.00113526
	0.9011			0.0224				0.00112588			0.00276783
	0.1251			0.0465				0.000914708			0.0044779
	0.3606			0.0463				0.0008315			0.00262984
	0.3339			0.0268				0.00109467			0.00649666
	0.3085			0.0629				0.00271507			0.00306652
	0.9219			0.1057				0.0028079			0.00234206
	0.0005			0.0507				0.00246356			0.00270201
	0.2297			0.0317				0.00168076			0.0011662
	0.0583			0.1189				0.00123761			0.00184818
	0.4336			0.0728				0.00113869			0.00294082
	0.5989			0.1282				0.00093855			0.00339007
	0.3664			0.0408				0.00268387			0.00448538
	0.0263			0.0335				0.00658835			0.00120274
	0.3807			0.0282				0.000882111			0.00428244
	2.6725			0.0333				0.00176447			0.00194495
	0.5359			0.0814				0.00270378			0.000655971
	0.674			0.0466				0.00317344			0.000991691
	0.2012			0.0302				0.0046443			0.000936899
	0.7303			0.1018				0.000892758			0.0038053
	0.3247			0.0302				0.00152209			0.00311015
	0.0694			0.0387				0.00100755			0.00210147
	0.3393			0.0533				0.00229944			0.00142077
	1.7732			0.0221				0.00151322			0.00155824
	0.4825			0.0448				0.00156408			0.00093665
	0.7853			0.052				0.00120528			0.00251024
	0.4697			0.0182				0.000804231			0.00306651
	0.0702			0.0367				0.00416119			0.00136837
	0.628			0.0118				0.000786096			0.00346033
	0.5811			0.0554				0.00626443			0.00329658
	0.7764			0.0191				0.00249476			0.00296187
	0.778			0.0317				0.000918001			0.00196613
	0.1386			0.0489				0.00317939			0.00220483
	0.0467			0.0352				0.00472154			0.001273
	0.7084			0.0145				0.000888444			0.0032654
	0.1344			0.0396				0.00129762			0.00322924
	0.0007			0.0111				0.00177969			0.00295795
	0.4435			0.0554				0.000836954			0.00129925
	0.1422			0.0838				0.00422715			0.0081915
	0.6101			0.0441				0.00142215			0.00157524
	0.8759			0.0672				0.00252038			0.00160923
	0.6762			0.027				0.00195041			0.00150649
	0.3795			0.0335				0.000960492			0.00293588
	0.583			0.0849				0.00196435			0.0021461
	0.1716			0.0373				0.00111523			0.0026013
	0.6929			0.029				0.00346223			0.00148418
	0.0753			0.0009				0.00207724			0.000787497
	0.2154			0.0302				0.00118574			0.00508655
	0.0381			0.061				0.00114743			0.00214573
	0.0192			0.0366				0.0060043			0.00142888
	0.2919			0.0801				0.00525473			0.00107388
	0.876			0.052				0.00127071			0.00554366
	0.2221			0.1209				0.00120045			0.0041229
	0.88			0.1658				0.00154683			0.00352298
	0.1408			0.0615				0.000850402			0.00118105
	0.3185			0.0389				0.00193468			0.0030948
	0.3935			0.0212				0.00133084			0.00176308
	0.3531			0.0182				0.0012144			0.000846088
	0.3258			0.0831				0.000687033			0.00244568
	0.1334			0.1354				0.000970125			0.00157752
	0.1289			0.0287				0.0022231			0.000844561
	0.5787			0.0183				0.00190893			0.00103988
	0.8404			0.026				0.00176916			0.00121288
	0.876			0.0468				0.00557587			0.00108846
	0.6018			0.0132				0.0013368			0.00182218
	0.1073			0.0653				0.00262515			0.00158894
	0.0927			0.0033				0.00368368			0.00429969
	1.0403			0.114				0.00201559			0.00126971
	0.0852			0.0498				0.00165705			0.00603944
	0.6615			0.1676				0.00110267			0.0910451
	0.8842			0.0281				0.000664465			0.00563535
	0.0528			0.0352				0.00303899			0.00143991
	0.1315			0.0238				0.00162166			0.00540375
	0.0232			0.0344				0.000817798			0.0114511
	0.1252			0.0181				0.0017665			0.00770092
	0.5828			0.021				0.000892624			0.00378704
	1.0701			0.0204				0.00396993			0.000927895
	0.3492			0.0995				0.00155215			0.00358094
	0.1782			0.0165				0.00119791			0.00359349
	0.7169			0.0298				0.0012215			0.00353909
	0.5229			0.0263				0.00150091			0.00212594
	0.1551			0.0007				0.00161734			0.00160377
	0.4831			0.091				0.00177297			0.00191756
	0.0895			0.0161				0.00159084			0.00281692
	0.138			0.0296				0.00112474			0.00148683
	0.4508			0.025				0.0040402			0.0079348
	0.526			0.0266				0.00147454			0.00359324
	0.579			0.009				0.00218377			0.00722162
	0.0153			0.0335				0.000865109			0.00324053
	0.1502			0.0728				0.0049913			0.00157296
	0.0089			0.03				0.00158717			0.00149609
	0.1093			0.066				0.00123584			0.0013113
	0.0129			0.0365				0.00328644			0.00119792
	0.0991			0.0208				0.00131752			0.00733247
	0.1533			0.0559				0.00114604			0.00317268
	0.081			0.0435				0.00145843			0.00159439
	0.019			0.0506				0.00140389			0.0070461
	0.0124			0.0367				0.0013146			0.00437427
	0.0439			0.0166				0.00127909			0.00361785
	0.0503			0.0262				0.000744238			0.000778109
	0.075			0.0142				0.00506093			0.00214966
	0.0307			0.0281				0.00254106			0.000733584
	0.5925			0.0583				0.00160314			0.00323939
	0.2023			0.0245				0.00181913			0.00152223
	1.0323			0.046				0.00307159			0.00472153
	0.0818			0.0934				0.0018719			0.0234703
	0.217			0.0366				0.00143902			0.000916224
	0.3053			0.083				0.00111306			0.00542976
	0.2011			0.042				0.00075426			0.00134668
	0.1793			0.036				0.000867143			0.000894032
	1.0726			0.0397				0.00303975			0.00171538
	0.0427			0.0735				0.00148202			0.00404298
	0.0706			0.032				0.00675996			0.00646305
	0.0478			0.0383				0.00228651			0.0042033
	0.288			0.0813				0.000710882			0.00114973
	0.2448			0.0406				0.000891618			0.00126197
	0.3295			0.1431				0.00239964			0.00339843
	0.3206			0.0509				0.00174633			0.00202751
	1.3313			0.1395				0.00749736			0.0016086
	0.2817			0.032				0.00686954			0.00460967
	0.0001			0.0509				0.00274995			0.00410019
	0.2273			0.087				0.00130256			0.00237859
	0.1552			0.024				0.000793196			0.00397437
	0.2284			0.0501				0.000809684			0.00531104
	0.2792			0.015				0.000744246			0.00288197
	0.1959			0.068				0.00128821			0.0043867
	1.373			0.0361				0.000835046			0.000853829
	0.2007			0.0305				0.00142127			0.00237656
	0.2638			0.0157				0.00230477			0.00752234
	1.2828			0.1134				0.000873111			0.00274272
	0.2781			0.0666				0.00155444			0.00146071
	0.0549			0.0613				0.00155952			0.00140046
	0.0713			0.0705				0.0006769			0.00264772
	0.2573			0.0231				0.00090988			0.00271101
	0.2799			0.0336				0.00201318			0.00305814
	0.5855			0.0168				0.00237224			0.00290036
	0.1691			0.099				0.00196588			0.00314464
[truncated: 6,763 more rows]

## Sheet: Fig. 3f
		LRD Frequency (Hz)		normal EPSP frequency (Hz)		LRD amplitude (mV)		normal frequency amplitude (mV)
		ctrl	Ach	ctrl	Ach	ctrl	Ach	ctrl	Ach
22072020 A	nFS	0.29	0	5.6	9	-	-	1.12	1.28
22072020 E	FS	0.16	0.09	11	13.1	14.9	12.8	1.64	1.4
26032021 A	nFS	0.7	0.4	21.4	22.1	17.1	14.8	1.86	2.12
26032021 B	FS	0.54	0.16	22	26.2	9	6	1.42	1.48
27042021 D	FS	0.31	0	10.6	14.9	-	-	1.21	1.27
27042021 E	FS	0.32	0	4.1	4.9	-	-	0.82	1.1
01072021 C	nFS	0.5	0.18	10.02	10.05	10.66	5.66	1.85	1.81
02082021 A	nFS	0.5	0	12.3	22.65	11.72	-	2.86	2.64
27082021 C	nFS	0.25	0.11	3.62	4.2	13.08	12.61	3.23	2.92
	Average	0.396667	0.104444	11.1822	14.1222	12.7433	10.374	1.77889	1.78
	SD	0.171828	0.132298	6.73522	7.98601	2.93752	4.23758	0.799335	0.648325

## Sheet: Fig. 3h
	LRD frequency			LRD amplitude
	ctrl	NE 30	NE & propranolol	ctrl	NE 30	NE & propranolol
01072021 D	0.14	0.26	0.14	10.83	10.55	8.62
02082021 G	0	0.25	0	-	-	-
27082021 C	0.21	0.34	0.21	9.92	8.72	12.42
16122021 H	0.1	0.275	0.01	6.72	5.81	6.32
Average	0.1125	0.28125	0.09	9.15667	8.36	9.12
SD	0.0877021	0.0404918	0.102307	2.15871	2.39042	3.08058
wilcoxon Man whitney		0.0107094	0.0155874		0.0992029	0.686892

## Sheet: Fig. 3l
globeal firing rate (Hz)	aCSF	aCSF +NE			Degree Centrality	aCSF	aCSF +NE			Negative LFP amplitude (µV)	aCSF	aCSF +NE			number_channels_with_lfp_down	aCSF	aCSF +NE
ID047	1.155	12.25			ID0126	0.02335	0.0323			ID047	-170.9	-195.3			ID047	0.3846	1.085
ID046	10.89	39.98			ID046	0.15	0.29645			ID046	-77.58	-104.4			ID046	11.5	20.08
ID042	60.68	31.58			ID051	0.0171	0.012			ID042	-63.46	-85.52			ID042	0.2353	0.3158
ID051	1.377	3.739			ID131	0.26715	0.4			ID051	-60.66	-162.5			ID051	0.2	0.2059
ID043	0.05	4.845			ID132	0.1053	0.1909			ID043	0	-59.48			ID043	0	6.585
ID2203CE007	0.4278	1.778			ID2203041CE	0.0548	0.1353			2203CE007	-31.58	-36.66			2203CE007	0.25	0.9
ID2203CE041	2.983	15.38			ID2203042CE	0.0433	0.0534			2203CE041	-24.24	-26.13			2203CE041	1.028	5.296
ID2203CE042	16.96	30.74								2203CE042	-17.71	-24.7			2203CE042	2.779	0.4444
ID126	28.28	25.34								ID126	-18.13	-18.69			ID126	27.24	17.18
ID131	1.843	4.829								ID131	-89.79	-46.32			ID131	0.4444	0.625
ID132	5.962	10.56								ID132	-20.89	-48.19			ID132	1.579	0.5405
ID135	0.5655	1.728								ID135	-82.95	-152.6			ID135	1	0.25
ID2203CG013	0	7.764								ID2204CG013	0	-35.78			ID2204CG013	0	0.5455
ID2205CT025	5.848	10.16								ID2205CT025	-33.83	-31.86
