# Supplementary material for: Modulation of large rhythmic depolarizations in human large basket cells by norepinephrine and acetylcholine
Source: Commun Biol. 2024 Jul 20;7:885. doi: 10.1038/s42003-024-06546-2 (PMC11271271; doi:10.1038/s42003-024-06546-2)
Supplement: Supplementary file 7 — Supplementary Data4 [file 42003_2024_6546_MOESM7_ESM.xlsx]

## Sheet: Fig. 4b
	LRD+
		ctrl	Ach 30µM	Vm change
22072020 A	nFS	-77.13	-70.1	7.03
22072020 E	FS	-73.99	-74.73	-0.74
26032021 A	nFS	-71.58	-68.74	2.84
26032021 B	FS	-66.25	-64.266	1.984
27042021 D	FS	-62.2	-58.96	3.24
02082021 A	nFS	-63.98	-54.33	9.65
10032021 C	FS	-65.8	-63.9	1.9
27042021 E	FS	-65.86	-64.39	1.47
01072021 C	FS	-63.94	-54.39	9.55
27082021 C	nFS	-78.94	-76.13	2.81
		-68.967	-64.9936	3.9734
		5.97357	7.62722	3.5368
	LRD-
		ctrl	ACh 30µM	Vm change
22072020 C	nFS	-69.07	-61.28	7.79
24092020 A	FS	-68.67	-64.05	4.62
24092020 E	nFS	-64.49	-67.31	-2.82
15102020 A	nFS	-79.97	-78.8	1.17
04112020 D	nFS	-72.91	-68.64	4.27
08022021 B	FS	-75.78	-72.31	3.47
08022021 C	FS	-68.6	-64.79	3.81
26032021 E	nFS	-62.25	-60.01	2.24
02082021 B	nFS	-68.1	-64.55	3.55
02082021 D	nFS	-68.98	-66.35	2.63
02082021 F	nFS	-63.71	-58.69	5.02
27082021 A	FS	-70.22	-68.49	1.73
		-69.3958	-66.2725	3.12333
		5.01068	5.53285	2.55499

## Sheet: Fig. 4e
inter event interval (s)	ctrl			Ach			Amplitude (V)	ctrl			Ach
	EPSP	LRD		EPSP	LRD			EPSP	LRD		EPSP	LRD
	0.069734	3.75513		0.0778	10.114			0.000991948	0.00591866		0.000794657	0.00635789
	0.221659	4.02993		0.0344	20.221			0.00122975	0.0060683		0.000746444	0.00517764
	0.180455	1.9847		0.2324	6.132			0.00287855	0.00426849		0.00142355	0.00445749
	0.296735	3.1157		0.1449	9.644			0.00149572	0.00570627		0.00109565	0.00460682
	0.025311	2.4577		0.0381	6.325			0.00145729	0.00555589		0.000946634	0.00501014
	0.45359	5		0.1059	14.719			0.00154772	0.00502028		0.000971757	0.00562755
	0.02312	2.8036		0.105	6.404			0.0011799	0.00453837		0.00118285	0.00851315
	0.19797	8.2608		0.036	17.815			0.000795737	0.00440314		0.000694953	0.00732575
	0.0889	5.0752		0.2435	0.872			0.00179352	0.00635245		0.00185416	0.00397553
	0.02974	10.7123		0.0075	2.188			0.00275489	0.00587972		0.000655353	0.00651602
	0.51645	3.1227		0.0181	1.29			0.00207216	0.00417142		0.000877239	0.00787112
	0.02413	3.4682		0.0192	6.957			0.00105523	0.00854175		0.00161476	0.00841303
	0.34946	9.7957		0.092	0.881			0.00160378	0.00389103		0.000870407	0.00746242
	0.04388	5.5471		0.0487	2.516			0.0019636	0.0080159		0.00236061	0.00591546
	0.38373	5.8527		0.155	0.823			0.00116467	0.00344979		0.00090687	0.00675728
	0.11115	1.4973		0.0126	1.258			0.00109594	0.00546713		0.00132135	0.0073756
	0.0197	3.2539		0.3841	1.786			0.0023678	0.00444509		0.00185232	0.0181869
	0.15377	5.8819		0.1125	5.232			0.00165172	0.00383288		0.00237409	0.00772558
	0.13763	3.8445		0.0525	2.178			0.00134657	0.00329993		0.000731826	0.00582872
	0.10123	2.4725		0.0609	6.234			0.00167899	0.00400269		0.00162718	0.00598272
	0.36418	2.2302		0.0164	0.725			0.00148176	0.00340945		0.00118583	0.00753072
	0.04968	4.91071		0.0398	4.41			0.00117356	0.00524333		0.00244094	0.0078859
	0.08341	6.5022		0.1116	2.935			0.000989906	0.00617081		0.000657082	0.0050114
	0.02429	4.7857		0.1116	0.885			0.00116456	0.0107321		0.000884108	0.00730779
	0.05817	5.0804		0.251	1.168			0.00165539	0.00674329		0.00154753	0.00853671
	0.02419	6.1193		0.0427	2.464			0.00134327	0.004475		0.00113533	0.00766103
	0.10128	5.5615		0.0979	3.167			0.000775576	0.00486782		0.00298186	0.00595532
	0.10511	4.4608		0.0203	3.1526			0.00345158	0.00479124		0.00105748	0.00554999
	0.21505	6.813		0.099	7.626			0.00236184	0.00346702		0.000694826	0.0106388
	0.10349	12.2215		0.1348	16.9538			0.00171957	0.0058687		0.00098595	0.00832843
	0.56253	4.2699		0.0077	1.6061			0.002035	0.00895936		0.00065475	0.00623078
	0.26005	4.2863		0.1452	4.5207			0.00214128	0.0060108		0.00141027	0.00496076
	0.34429	4.6218		0.0906	3.54			0.00136876	0.011343		0.000913635	0.0077241
	0.44848	6.1371		0.0407	1.4706			0.0014753	0.00450382		0.00083787	0.006088
	0.04638	13.3866		0.0774	1.562			0.00138156	0.00388913		0.00224533	0.00391297
	0.13269	3.7368		0.0768	5.763			0.00175965	0.00334942		0.000869632	0.00388143
	0.10838	0.7502		0.0971	0.415			0.0010272	0.00612193		0.00215095	0.00324494
	0.1527	1.7024		0.0945	2.613			0.0010707	0.00759394		0.00104839	0.00598754
	0.06486	0.8808		0.0562	13.355			0.00132766	0.0107701		0.000809222	0.00503864
	0.19975	4.3998		0.1408	2.252			0.000941083	0.0127656		0.00128939	0.00345776
	0.04113	0.2022		0.0626	1.421			0.00208712	0.0050299		0.00127308	0.00421099
	0.1242	1.1108		0.0806	10.191			0.00110418	0.00798362		0.000687294	0.0054769
	0.14724	3.7489		0.0115	5.526			0.00149698	0.00765525		0.00250798	0.00343925
	0.26806	1.5536		0.0552	11.501			0.00115301	0.00432719		0.000733957	0.00586582
	0.14425	0.7915		0.0802	18.362			0.00135125	0.00663239		0.00107413	0.00378895
	0.07814	1.3346		0.0091	4.417			0.00103634	0.00756437		0.00148048	0.00635992
	0.50357	1.0577		0.1145	9.111			0.00120236	0.00761324		0.000865132	0.00751304
	0.01647	0.5056		0.0564	9.912			0.00167189	0.00599173		0.000946485	0.00369907
	0.07044	3.683		0.0129	12.827			0.00233128	0.00883576		0.000935212	0.0058739
	0.34325	1.688		0.0355	9.315			0.00237453	0.00484274		0.00129145	0.00616674
	0.15809	0.6987		0.0173	10.251			0.00232455	0.00356929		0.00101093	0.0153866
	0.20863	2.0387		0.0253	10.821			0.00173136	0.00753031		0.000866488	0.0056781
	0.18178	0.6075		0.0154	4.463			0.00113273	0.00706583		0.00152761	0.0145983
	0.34546	1.0796		0.0879	4.95			0.00151069	0.00656868		0.000878267	0.0173025
	0.22508	0.6868		0.0339				0.000966065	0.00589196		0.00166874	0.0052683
	0.49622	0.5771		0.0492				0.00344333	0.00461792		0.000679992	0.0593543
	0.0248	0.4545		0.0836				0.00143712	0.00734104		0.00266368	0.0170113
	0.6127	0		0.0203				0.00215916	0.00609286		0.00128426	0.00686077
	0.0792	3.078		0.1958				0.0016696	0.00643818		0.000806168	0.0142412
	0.0663	0.953		0.0774				0.00104991	0.00416339		0.000672534	0.0063037
	0.3946	1.661		0.0348				0.0013028	0.00872522		0.000698142
	1.3599	1.146		0.0717				0.00160175	0.00489483		0.000840753
	0.0738	2.108		0.0221				0.00134403	0.00672932		0.000896692
	0.253	1.043		0.0249				0.00315415	0.00383247		0.00142228
	0.2025	1.068		0.0399				0.00113666	0.00671412		0.000715204
	0.0048	2.131		0.1673				0.0021527	0.00589462		0.001044
	0.5955	1.263		0.0732				0.00162686	0.005154		0.00116621
	0.0312	0.744		0.0574				0.0019825	0.00378273		0.000688687
	0.134	0.907		0.0163				0.000988513	0.00557395		0.0014116
	0.0228	3.033		0.1111				0.00155405	0.00578631		0.00109029
	0.4705	0.9248		0.0378				0.00108186	0.00589442		0.00106421
	0.341	2.7045		0.0296				0.00196512	0.0108269		0.000877939
	0.6286	2.5404		0.0756				0.00124751	0.00855803		0.000760064
	0.0148	3.2318		0.0182				0.000988133	0.00454268		0.00140391
	0.023	0.4985		0.2262				0.00102542	0.00776153		0.00177504
	0.1397	1.2575		0.0314				0.000901505	0.00465912		0.00107392
	0.2656	0.7856		0.1665				0.00108439	0.00413655		0.000681572
	0.8264	1.8412		0.034				0.00180519	0.00482098		0.00104454
	0.1153	3.1332		0.104				0.000933096	0.00520308		0.000670202
	0.147	0.6358		0.1454				0.00124852	0.0071189		0.000739731
	0.1057	0.5426		0.0393				0.00167264	0.00607032		0.000884824
	0.1922	1.673		0.1724				0.000963405	0.00622458		0.00149846
	0.092	1.3995		0.0798				0.00189891	0.00344893		0.000860289
	1.2082	3.2966		0.1237				0.00118764	0.0102275		0.00207835
	0.2145	1.1948		0.1251				0.00125207	0.00805863		0.00170259
	0.8786	1.0589		0.0422				0.0011038	0.0032359		0.000978544
	0.186	1.9532		0.2346				0.0011567	0.00358063		0.00133412
	0.3169	2.2775		0.0562				0.00202599	0.00413909		0.000822842
	0.0331	2.7799		0.0234				0.00154505	0.0144124		0.00150318
	0.0483	2.9099		0.0239				0.0018355	0.00392459		0.00149839
	0.2339	3.7144		0.1671				0.00150573	0.00632848		0.00112237
	0.0688	1.2974		0.0808				0.00135391	0.00778052		0.0012693
	0.1394	1.1872		0.0747				0.00218022	0.0052591		0.00068368
	0.2113	2.0143		0.1009				0.00127453	0.00576466		0.00128108
	0.0285	1.9184		0.175				0.0013926	0.00620298		0.00239608
	0.0516	1.9351		0.1057				0.00201154	0.0130601		0.000658087
	0.0451	5.16225		0.0785				0.00160441	0.00763934		0.00096669
	0.1406	0.9725		0.1819				0.000852682	0.00438756		0.00130945
	0.1482	0.83026		0.0907				0.000959218	0.00588568		0.00171556
	0.2784	1.77201		0.256				0.000959851	0.00415532		0.00111282
	0.4099	2.9537		0.0749				0.00161177	0.0047815		0.000969283
	0.0347	3.0674		0.218				0.00164804	0.00700951		0.00104187
	0.0883	5.2334		0.0388				0.00117598	0.0094078		0.000729389
	0.5377	0.8685		0.0703				0.0023328	0.00916284		0.00067582
	0.107	2.1143		0.1165				0.00104787	0.00727125		0.0016591
	0.6638	3.087		0.0137				0.00170042	0.00895702		0.0012509
	0.2807	11.6083		0.2153				0.0014649	0.0133814		0.00103986
	0.0243	0.9155		0.0485				0.00295795	0.00547261		0.0012915
	0.2552	3.239		0.1966				0.00127541	0.0164196		0.00106969
	0.3789	7.8862		0.1956				0.00158412	0.0133922		0.00145272
	0.0582	1.995		0.1149				0.00114173	0.00585146		0.000924751
	0.4165	2.8266		0.0201				0.0028764	0.013202		0.00164524
	0.0412	5.7474		0.173				0.000914194	0.00944318		0.00160548
	0.0424	2.7267		0.108				0.00254092	0.00719755		0.00295586
	0.2053	0.6044		0.136				0.00120425	0.0111757		0.001593
	0.2761	6.6529		0.285				0.00111497	0.0063687		0.00170965
	0.1326	1.5422		0.153				0.00175014	0.00917938		0.000802524
	0.3548	0.6266		0.066				0.00108973	0.0156842		0.00168638
	0.0844	0.6618		0.079				0.00192592	0.0126407		0.00174998
	0.7593	2.2369		0.059				0.00147516	0.0035053		0.00138599
	0.0726	4.5892		0.064				0.00130953	0.017029		0.000742123
	0.0793	1.3782		0.115				0.00094109	0.0153744		0.00121058
	0.0161	4.7417		0.166				0.00140212	0.00569736		0.00138055
	0.1476	2.3972		0.121				0.00212898	0.010437		0.00076434
	0.4303	3.0352		0.091				0.00115556	0.00868373		0.00147155
	0.2521	5.4795		0.012				0.00167569	0.0142108		0.00179441
	0.0419	5.021		0.054				0.000966452	0.00313997		0.00257079
	0.0357	3.894		0.167				0.00135354	0.0162461		0.000911571
	0.1235	4.28		0.192				0.000961252	0.0360899		0.00196574
	0.2124	1.241		0.059				0.00215548	0.00787585		0.00154527
	0.1038	3.025		0.268				0.00152451	0.0110309		0.00114449
	0.126	8.125		0.214				0.00149102	0.00524459		0.000854231
	0.1016	1.655		0.029				0.00116888	0.00978567		0.0011526
	0.1384	2.168		0.022				0.00079789	0.00661121		0.000914633
	0.0332	1.181		0.029				0.00215587	0.00611332		0.00148272
	0.5013	3.906		0.021				0.00162788	0.00550797		0.00137603
	0.2128	2.248		0.024				0.00108985	0.00555915		0.00190151
	0.3746	3.65		0.051				0.00113729	0.00532059		0.00139005
	0.017	1.909		0.078				0.0011397	0.00422029		0.0008507
	0.4574	1.086		0.023				0.00146972	0.0058169		0.000982933
	0.0789	3.884		0.152				0.000960357	0.00635656		0.00100034
	0.049	1.181		0.084				0.00138143	0.00500361		0.00188116
	0.0752	1.691		0.046				0.00242932	0.00530064		0.00164346
	0.047	1.674		0.233				0.00164106	0.00618834		0.0018631
	0.0692	1.924		0.048				0.00186454	0.00575886		0.00132778
	0.017	4.168		0.115				0.00135354	0.0104332		0.00115351
	0.1411	2.518		0.126				0.00217997	0.00708485		0.00158734
	0.0874	1.34		0.094				0.00212631	0.00428301		0.00077901
	0.2091	2.777		0.125				0.00214876	0.00548661		0.000682399
	0.0875	1.191		0.119				0.00206062	0.00683345		0.00165088
	0.0441	0.988		0.249				0.00144194	0.0100106		0.00198762
	0.0528	1.954		0.059				0.00369725	0.00747881		0.00173074
	0.4331	4.937		0.08				0.00196182	0.00707533		0.000649519
	0.0443	4.456		0.189				0.00126869	0.00489399		0.00100495
	0.1741	2.083		0.024				0.00163206	0.00610454		0.000972703
	0.246	6.755		0.082				0.0012626	0.004715		0.00259207
	0.037	7.419		0.433				0.00246458	0.00638269		0.00135594
	0.0641	3.185		0.093				0.000863209	0.00709475		0.00254335
	0.3222	1.162		0.135				0.0013387	0.00888831		0.000846572
	0.1635	2.284		0.099				0.00128023	0.010862		0.00102757
	0.1514	1.346		0.099				0.00171552	0.00364387		0.00146959
	0.2271	2.034		0.033				0.00204806	0.00603554		0.00207129
	0.1126	0.779		0.364				0.00142024	0.0101021		0.00257837
	0.1186	3.357		0.014				0.00198769	0.00494286		0.001421
	0.016	0.802		0.038				0.00197045	0.00970131		0.00210916
	0.1393	0.883		0.054				0.0017958	0.00834637		0.00118007
	0.2495	0.91		0.035				0.00128823	0.00678724		0.00243797
	0.1695	1.203		0.348				0.00151741	0.0102753		0.00120831
	0.1304	0.047		0.082				0.00134656	0.00516894		0.00181302
	0.0618	1.598		0.024				0.0012177	0.00640355		0.00110813
	0.0903	2.601		0.093				0.00150409	0.00770971		0.00103437
	0.3625	1.319		0.01				0.00141797	0.00803661		0.000968792
	0.019	4.303		0.08				0.00139818	0.00683451		0.00212082
	0.2761	0.798		0.087				0.00130927	0.00489308		0.00229589
	0.1533	1.659		0.368				0.00146553	0.00322906		0.000708044
	0.0113	1.091		0.182				0.00169307	0.00363581		0.00167858
	0.0483	2.542		0.049				0.00143205	0.00619968		0.0016551
	0.0003	4.201		0.119				0.00125778	0.00743624		0.00146922
	0.1281	1.621		0.083				0.00252076	0.0077866		0.0017537
	0.2554	1.803		0.03				0.00140795	0.00461983		0.00205708
	0.0803	2.961		0.306				0.00120895	0.00837849		0.00186146
	0.0272	1.67451		0.025				0.0013113	0.00472382		0.000834182
	0.0322	1.14501		0.153				0.00106069	0.00720054		0.000760853
	0.0789	0.99176		0.147				0.00212251	0.00415751		0.0012453
	0.1487	1.97625		0.101				0.00185921	0.00659373		0.00161234
	0.284	1.28728		0.062				0.0011572	0.00370925		0.0038372
	0.0302	1.464		0.071				0.00127935	0.00727109		0.00136102
	0.4604	1.15623		0.136				0.00208383	0.00536712		0.00164766
	0.2624	0.5931		0.178				0.000997394	0.0546055		0.00217239
	0.0638	1.4178		0.052				0.00180633	0.0111967		0.00116663
	0.1492	0.9431		0.086				0.00129799	0.00765966		0.00226371
	0.1421	1.4988		0.135				0.00127021	0.0043839		0.00123385
	0.1272	2.2253		0.026				0.00147022	0.0172565		0.00225431
	0.2569	1.2855		0.133				0.00094565	0.0074864		0.0019193
	0.078	0.5256		0.099				0.00111713	0.0149083		0.00153083
	0.3366	1.5195		0.108				0.00144067	0.00472486		0.00140151
	0.0271	2.1926		0.107				0.00100463	0.0163172		0.00175173
	0.0619	5.2588		0.2				0.00130687	0.00522598		0.000770472
	0.1253	1.0419		0.118				0.0012385	0.0034243		0.00234541
	0.1854	2.3673		0.045				0.0012385	0.00543281		0.000703447
	0.103	4.0385		0.186				0.0012579	0.0117122		0.00104006
	0.6076	6.1472		0.148				0.00205503	0.00714589		0.00273274
	0.2859	2.3705		0.149				0.0023016	0.00825929		0.00122267
	0.1184	4.2838		0.024				0.00105371	0.00309076		0.000866652
	0.1264	1.4006		0.23				0.00209765	0.00399835		0.00203651
	0.1905	2.0017		0.019				0.000903673	0.00403393		0.00132407
	0.2712	7.0197		0.222				0.00181748	0.0109545		0.00195836
	0.052	2.7022		0.009				0.000968099	0.00309994		0.00269525
	0.1404	1.8012		0.177				0.00204121	0.0147443		0.0015746
	0.0119	2.7034		0.01				0.0015103	0.00532226		0.00157848
	0.0965	2.9406		0.259				0.00144613	0.00698755		0.00159281
	0.3463	5.8609		0.104				0.00144295	0.00373362		0.00107545
	0.2374	0.8969		0.034				0.00124523	0.00552329		0.00104376
	0.4871	1.603		0.032				0.000965185	0.014695		0.0014084
	0.3531	1.5568		0.075				0.00102923	0.00393248		0.00209557
	0.1669	2.2202		0.24				0.00125816	0.0120404		0.00114698
	0.3175	1.3599		0.115				0.00102492	0.0182069		0.00153448
	0.2411	0.7872		0.02				0.000867017	0.00600321		0.00235267
	0.0811	1.1751		0.023				0.00104306	0.0044575		0.000686184
	0.3693	2.419		0.12				0.00135595	0.054556		0.00101086
	0.0475	2.084		0.289				0.00273701	0.0141317		0.00250197
	0.1429	0.5402		0.065				0.000964925	0.0091446		0.00196729
	0.1699	2.7392		0.057				0.00227065	0.0160389		0.00114198
	0.031	0.4845		0.043				0.000961371	0.0150584		0.00120459
	0.0726	0.6924		0.034				0.00112651	0.0536452		0.00128986
	0.2993	0.7262		0.023				0.000752605	0.00464882		0.0015163
	0.1084	1.0378		0.017				0.00117433	0.0215071		0.000923999
	0.0486	1.7885		0.069				0.000773281	0.00380792		0.00114369
	0.3179	3.13028		0.056				0.0013491	0.0099944		0.00156903
	0.1748	0.31236		0.205				0.00215396	0.0164844		0.00205138
	0.3898	3.66093		0.039				0.00172883	0.00956991		0.00150006
	0.3711	1.43422		0.055				0.000872351	0.0210586		0.00132002
	0.0577	0.76051		0.212				0.00191033	0.00377427		0.000749305
	0.0685	0.04048		0.073				0.00201965	0.0156848		0.00102004
	0.1251	9.3392		0.034				0.00101858	0.0031813		0.00194424
	0.0387	3.1805		0.151				0.00178654	0.0185724		0.000994295
	0.2861	5.4737		0.026				0.00156763	0.00565603		0.00236109
	0.181	4.2459		0.016				0.000939056	0.00543777		0.00239111
	0.0439	1.8496		0.182				0.00121111	0.00543389		0.000698246
	0.0577	2.0536		0.114				0.00141746	0.0179354		0.0016671
	0.0341	3.0208		0.047				0.000865109	0.00582997		0.000812769
	0.0521	2.7055		0.022				0.000755273	0.0631562		0.00155444
	0.1447	5.1418		0.136				0.00128873	0.0181859		0.00159098
	0.0372	7.3088		0.057				0.000691734	0.0150633		0.0022831
	0	9.2453		0.042				0.00257733	0.00797623		0.00365495
	0.0518	0.9514		0.236				0.00126805	0.00520091		0.000818096
	0.1212	5.9737		0.011				0.00102479	0.00504825		0.00145529
	0.1528	2.9903		0.01				0.00195599	0.0137366		0.00226156
	0.3255	2.8619		0.219				0.00159464	0.00718801		0.000992276
	0.0598	2.6457		0.072				0.00136179	0.0210614		0.00159348
	0.0389	2.6909		0.214				0.000995874	0.0168761		0.000792012
	0.1975	8.9958		0.019				0.00111154	0.00859789		0.00124869
	0.0998			0.043				0.002286	0.00624879		0.00124067
	0.0203			0.17				0.00131143	0.0146314		0.00262213
	0.0349			0.08				0.00132614	0.00379173		0.00244205
	0.0381			0.132				0.00228295	0.0172147		0.00200214
	0.0275			0.031				0.00182953	0.0174278		0.000936672
	0.5406			0.047				0.00178248	0.0056565		0.000916511
	0.1135			0.011				0.00119817	0.0132524		0.00142642
	0.3144			0.029				0.000907481	0.00455774		0.00234456
	0.0891			0.035				0.00137434	0.00922436		0.00122634
	0.0908			0.221				0.000778362	0.0158141		0.0011512
	0.0422			0.075				0.000816539	0.0108247		0.00116666
	0.1695			0.033				0.000732698			0.000729829
	0.03			0.111				0.00235841			0.0022439
	0.0603			0.066				0.00196587			0.000766747
	0.0459			0.034				0.00151398			0.00145692
	0.2888			0.017				0.00134238			0.000842549
	0.014			0.072				0.00114237			0.000780843
	0.4655			0.103				0.00504914			0.00150532
	0.062			0.091				0.000784442			0.00162358
	0.1423			0.134				0.00172769			0.0013402
	0.2373			0.101				0.00112131			0.000812851
	0.2355			0.112				0.00116126			0.00109681
	0.255			0.164				0.00202042			0.00160498
	0.1731			0.054				0.00163765			0.0021696
	0.1336			0.181				0.000888951			0.00204301
	0.0984			0.192				0.00201128			0.00185594
	0.2228			0.03				0.00105751			0.00106421
	0.0551			0.25				0.00196245			0.00219726
	0.0396			0.015				0.000957318			0.00110166
	0.0718			0.097				0.000934988			0.00220264
	0.2443			0.115				0.00143077			0.00130427
	0.059			0.061				0.000981547			0.00393801
	0.1591			0.031				0.000716209			0.00165467
	0.1396			0.145				0.0012229			0.000960305
	0.1794			0.021				0.000885539			0.000792697
	0.0287			0.16				0.00166985			0.00174288
	0.1176			0.071				0.00117446			0.00322562
	0.049			0.233				0.00213913			0.00120237
	0.4556			0.094				0.00113374			0.00202893
	0.2514			0.127				0.00210565			0.00224932
	0.5152			0.044				0.00264252			0.000814378
	0.2948			0.117				0.00114034			0.00216777
	0.5104			0.124				0.000845961			0.00191762
	0.05			0.229				0.000734851			0.00164606
	0.0577			0.052				0.00168799			0.00193448
	0.05			0.22				0.00207267			0.000925116
	0.1071			0.021				0.00162051			0.000657126
	0.0676			0.085				0.00151589			0.000733525
	0.3211			0.123				0.00156686			0.000825405
	0.2491			0.082				0.00107311			0.00160421
	0.2179			0.114				0.00182154			0.0013242
	0.2108			0.01				0.000997901			0.00210166
	0.5019			0.083				0.00225329			0.00182099
	0.1284			0.068				0.00146338			0.00117138
	0.0867			0.023				0.00140554			0.000869684
	0.2014			0.076				0.00415423			0.00213353
	0.1017			0.067				0.00252989			0.000935256
	0.0816			0.205				0.00191274			0.000890009
	0.0847			0.058				0.00227991			0.00161145
	0.5105			0.02				0.00216082			0.000768006
	0.0542			0.019				0.000890099			0.00175719
	0.7206			0.088				0.000967845			0.00178004
	0.1213			0.176				0.00114173			0.000982292
	0.0919			0.212				0.00180062			0.000885688
	0.0909			0.075				0.000955924			0.00220615
	0.0742			0.042				0.0011728			0.00149664
	0.1038			0.028				0.00160556			0.000648744
	0.2107			0.322				0.00259927			0.00100171
	0.2144			0.056				0.00134428			0.00164342
	0.174			0.032				0.00160276			0.00229859
	0.1041			0.022				0.00120768			0.00133239
	0.0399			0.168				0.00279814			0.00206504
	0.1401			0.015				0.00098294			0.00118386
	0.1211			0.057				0.00113133			0.00123072
	0.3009			0.11				0.00154619			0.000940487
	0.3309			0.066				0.00114363			0.000820696
	0.3359			0.015				0.00104978			0.000850409
	0.1575			0.154				0.00133514			0.00169881
	0.1047			0.154				0.000827312			0.00102958
	0.2388			0.07				0.00167784			0.0012166
	0.1081			0.028				0.00185173			0.00163127
	0.3338			0.105				0.00188065			0.000972569
	0.0955			0.067				0.0017873			0.0014311
	0.0097			0.252				0.00112879			0.000990115
	0.5497			0.211				0.000781022			0.00257667
	0.0702			0.241				0.000993468			0.000882812
	0.0663			0.248				0.00227775			0.000985533
	0.455			0.161				0.000813872			0.00157118
	0.3665			0.068				0.00143167			0.00149636
	0.0196			0.069				0.00093893			0.00233937
	0.0331			0.146				0.00173111			0.00298283
	0.1247			0.141				0.0012342			0.00213721
	0.0575			0.074				0.00157639			0.00199965
	0.3971			0.181				0.00203677			0.0020854
	0.1892			0.067				0.00156623			0.00198451
	0.041			0.048				0.00150244			0.00109743
	0.2017			0.015				0.0013529			0.00130069
	0.081			0.171				0.00170068			0.00070107
	0.2173			0.245				0.001567			0.00187171
	0.0421			0.176				0.00106753			0.00203508
	0.2646			0.172				0.00072851			0.00182915
	0.0189			0.055				0.00127997			0.00193554
	0.027			0.09				0.00113247			0.00119843
	0.1661			0.066				0.00158196			0.00208452
	0.0461			0.065				0.00186593			0.00193621
	0.1155			0.012				0.00178044			0.00192995
	0.5289			0.161				0.00187418			0.0020355
	0.0319			0.024				0.00170486			0.00109907
	0.0729			0.169				0.00103342			0.000894085
	0.1859			0.084				0.00141175			0.00140306
	0.4435			0.212				0.00148392			0.00173388
	0.312			0.143				0.0014739			0.000929385
	0.1046			0.076				0.00135278			0.000848651
	0.2721			0.217				0.0016918			0.00171679
	0.0671			0.114				0.00123013			0.00121431
	0.1585			0.008				0.000906326			0.00201327
	0.0913			0.094				0.00228473			0.00161795
	0.1287			0.028				0.00104141			0.00100844
	0.047			0.191				0.00215168			0.00136423
	0.1066			0.166				0.00131372			0.00207074
	0.0262			0.035				0.00131384			0.00138033
	0.0607			0.016				0.000928901			0.00175494
	0.8614			0.225				0.00104433			0.00129156
	0.3084			0.214				0.0011832			0.000966258
	0.047			0.203				0.00166631			0.0016442
	0.3151			0.034				0.00225163			0.00251555
	0.0481			0.214				0.00100527			0.000973694
	0.0322			0.133				0.00160948			0.00130683
	0.1889			0.16				0.00140897			0.00149404
	0.0707			0.013				0.00185364			0.00227813
	0.3717			0.229				0.00126184			0.00254549
	0.2262			0.025				0.00109176			0.00228137
	0.0628			0.195				0.0040681			0.00145194
	0.0998			0.042				0.00115086			0.00249047
	0.1496			0.059				0.00113489			0.00159054
	0.1732			0.264				0.00098522			0.00166866
	0.0721			0.057				0.000996634			0.00100103
	1.0098			0.037				0.00111548			0.00159015
	0.0144			0.168				0.00143293			0.00166
	0.0176			0.135				0.00270213			0.000975572
	0.0615			0.117				0.0012366			0.00140075
	0.1838			0.037				0.00242463			0.00149105
	0.2516			0.103				0.000780262			0.000748806
	0.0573			0.033				0.00157993			0.00164992
	0.1182			0.036				0.00136115			0.00188523
	0.0742			0.018				0.0011766			0.00109063
	0.3981			0.022				0.00121301			0.00144023
	0.0756			0.214				0.000844441			0.00189294
	0.2429			0.274				0.001169			0.00193818
	0.757			0.106				0.00174189			0.000682823
	0.1021			0.109				0.00154886			0.00166944
	0.0274			0.192				0.00142456			0.000743769
	0.0466			0.029				0.00193429			0.00105167
	0.1029			0.214				0.00218542			0.00243661
	0.2276			0.014				0.00309568			0.00118943
	0.0803			0.178				0.00103024			0.00101876
	0.0439			0.038				0.00119855			0.001897
	0.0365			0.15				0.00136533			0.00173412
	0.163			0.05				0.00145437			0.00152203
	0.2301			0.055				0.00136381			0.00187951
	0.0526			0.15				0.000848621			0.000802152
	0.0905			0.017				0.000925481			0.000744291
	0.0584			0.158				0.00202866			0.00219874
	0.0573			0.014				0.0016956			0.00147393
	0.0482			0.088				0.002234			0.00150752
	0.3067			0.207				0.00148962			0.00182513
	0.0212			0.189				0.000840753			0.000861131
	0.233			0.022				0.00176917			0.00137124
	0.0571			0.201				0.00100527			0.00112176
	0.0412			0.013				0.000972666			0.00143837
	0.399			0.211				0.0017958			0.00216269
	0.2347			0.107				0.00128353			0.00163854
	0.0255			0.058				0.00182231			0.000926375
	0.3381			0.04				0.00162305			0.00111438
	0.0317			0.146				0.00284646			0.000952072
	0.1088			0.082				0.000773028			0.000966795
	0.1034			0.094				0.00104839			0.00141753
	0.0582			0.023				0.00100906			0.00126033
	0.0792			0.086				0.00214065			0.000936098
	0.3009			0.003				0.00150953			0.00165471
	0.045			0.224				0.000803724			0.00202493
	0.1118			0.192				0.00162673			0.00222173
	0.2487			0.08				0.00158298			0.000880428
	0.1582			0.151				0.00098826			0.00178403
	0.4431			0.233				0.00235233			0.00125173
	0.0793			0.038				0.00124688			0.000863165
	0.5265			0.025				0.00071495			0.00137831
	0.1998			0.171				0.00135899			0.00186057
	0.2145			0.06				0.00121973			0.000774182
	0.0657			0.172				0.00143433			0.00156992
	0.2005			0.174				0.00185744			0.00149918
	0.1113			0.059				0.00191045			0.00122689
	0.0251			0.007				0.00166199			0.0014316
	0.2664			0.178				0.0010962			0.00185034
	0.3718			0.104				0.000959724			0.000907913
	0.1373			0.084				0.00167505			0.00132957
	0.5597			0.029				0.00236235			0.00260046
	1.1538			0.127				0.00113603			0.00137804
	0.2578			0.275				0.000878431			0.00138643
	0.348			0.101				0.000928529			0.0019202
	0.3215			0.096				0.000670932			0.00103295
	0.6178			0.056				0.00111066			0.00135684
	0.0455			0.115				0.000870816			0.000973091
	0.1186			0.056				0.00235841			0.00170676
	0.3024			0.03				0.00115111			0.000761531
	0.0076			0.208				0.000991307			0.00239383
	0.5657			0.46				0.00126805			0.00100232
	0.0219			0.078				0.00174862			0.000981532
	0.38			0.165				0.00119182			0.00179698
	0.0651			0.018				0.00200824			0.00129023
	0.0223			0.114				0.00134669			0.000944488
	0.1233			0.049				0.00232709			0.000927776
	0.1765			0.035				0.000844307			0.00157454
	0.0575			0.032				0.00105638			0.00157092
	0.9074			0.082				0.00138283			0.000843346
	0.2293			0.122				0.00142228			0.00192036
	0.0709			0.161				0.0015618			0.000821836
	0.1552			0.12				0.00351638			0.00122121
	0.031			0.172				0.00147707			0.000761971
	0.3033			0.045				0.001619			0.00126267
	0.0704			0.072				0.000922948			0.00160091
	0.0602			0.145				0.0015122			0.00115363
	0.131			0.203				0.00265597			0.00259268
	0.2976			0.031				0.000981674			0.0021386
	0.1515			0.036				0.00119335			0.000909567
	0.0177			0.183				0.00105535			0.00161953
	0.0272			0.252				0.0014734			0.000850156
	0.094			0.208				0.00190538			0.00103564
	0.1272			0.046				0.00144804			0.000994474
	0.0499			0.073				0.00129089			0.00152854
	0.023			0.116				0.000989914			0.000783905
	0.1629			0.12				0.00167454			0.00124021
	0.0419			0.061				0.00231759			0.00212802
	0.4328			0.022				0.00163954			0.00076399
	0.0806			0.107				0.0014016			0.000682406
	0.2055			0.016				0.00143433			0.0016898
	0.287			0.237				0.00177158			0.000835329
	0.2009			0.225				0.00222562			0.00182286
	0.5253			0.234				0.000880077			0.00228573
	0.0369			0.251				0.000951104			0.000888862
	0.2654			0.262				0.00118041			0.000766397
	0.4863			0.257				0.00181393			0.00170732
	0.0596			0.159				0.00158805			0.00148742
	0.2406			0.046				0.00177677			0.00160077
	0.1205			0.108				0.00179885			0.000755399
	0.0816			0.05				0.000804745			0.00191728
	0.1751			0.127				0.00123748			0.00152694
	0.4283			0.076				0.00119779			0.00176648
	0.2435			0.121				0.000878297			0.00126457
	0.0912			0.038				0.000866376			0.00116145
	0.1986			0.198				0.00182877			0.00151104
	0.3573			0.01				0.00078965			0.0010225
	0.0521			0.008				0.00080359			0.00169406
	0.4452			0.063				0.00288679			0.00134346
	0.0406			0.257				0.000824787			0.00131118
	0.0295			0.16				0.00157156			0.000696063
	0.0296			0				0.00104863			0.000977576
	0.1845			0.067				0.00112829			0.00118119
	0.8114			0.113				0.00162369			0.00118706
	0.1277			0.175				0.00147073			0.00128605
	0.0294			0.022				0.00173136			0.00176054
	0.2346			0.231				0.00146972			0.000852883
	0.9769			0.07				0.0011813			0.000883535
	0.0446			0.205				0.00148341			0.000706829
	0.0156			0.297				0.00117166			0.00162547
	0.446			0.106				0.00143382			0.00170612
	0.2251			0.133				0.00235778			0.00127818
	0.0173			0.27				0.00318421			0.00085599
	0.0805			0.023				0.00143002			0.00135923
	0.2014			0.298				0.000893652			0.0012899
	0.1228			0.016				0.00130192			0.00131287
	0.0953			0.071				0.00113893			0.00248057
	0.0371			0.166				0.00158665			0.00263112
	0.3879			0.136				0.00142799			0.00178942
	0.0874			0.177				0.00131245			0.00215694
	0.1064			0.024				0.000998795			0.000683501
	0.2182			0.169				0.000890352			0.00105565
	0.0454			0.063				0.0013212			0.00164327
	0.1622			0.285				0.000846848			0.00184306
	0.0735			0.009				0.00208066			0.00193376
	0.030992			0.13				0.00157587			0.00146722
	0.029317			0.155				0.00147884			0.00109246
	0.139369			0.154				0.000804618			0.00105017
	0.069422			0.015				0.00152514			0.00184771
	0.161199			0.074				0.000782922			0.00212803
	0.172465			0.164				0.001619			0.000770591
	0.000737			0.058				0.00115822			0.00118735
	0.120385			0.182				0.00143407			0.00115928
	0.073326			0.061				0.00108973			0.000796974
	0.068076			0.019				0.00162964			0.00216327
	0.073742			0.181				0.00128695			0.000723608
	0.10487			0.075				0.000821613			0.00138402
	0.00144			0.099				0.00353959			0.00140266
	0.05146			0.015				0.00180887			0.00188858
	0.06711			0.168				0.00442729			0.00116894
	0.08129			0.057				0.00086841			0.000710443
	0.22263			0.173				0.00192999			0.00164554
	0.09251			0.017				0.00100462			0.00118651
	0.06367			0.111				0.00145691			0.000904366
	0.05947			0.162				0.00068602			0.00105704
	0.24977			0.013				0.00164792			0.00129852
	0.14639			0.212				0.00153718			0.000795603
	0.00067			0.081				0.000983447			0.00173481
	0.29005			0.066				0.00230616			0.000895709
	-0.00035			0.113				0.00164448			0.000887893
	0.208			0.202				0.00188876			0.00151879
	0.0783			0.092				0.00255082			0.00100917
	0.04629			0.112				0.00223019			0.000757165
	0.12914			0.042				0.00378451			0.000982709
	0.06004			0.374				0.00108783			0.00131568
	0.07554			0.089				0.00398415			0.0010493
	0.15378			0.068				0.00188863			0.000882208
	0.0257			0.102				0.00254893			0.00198913
	0.02468			0.207				0.00181507			0.000985533
	0.12705			0.047				0.00175115			0.00187999
	0.06646			0.018				0.00109494			0.00182991
	0.06246			0.031				0.00224566			0.00129323
	0.07381			0.062				0.00474741			0.00121636
	0.05265			0.058				0.00362419			0.00123681
	0.29911			0.024				0.00218695			0.00280489
	0.06336			0.087				0.00168356			0.00103935
	0.0347			0.382				0.00249882			0.000856087
	0.10926			0.017				0.00492585			0.00108325
	0.13919			0.162				0.000838988			0.0010571
	0.09221			0.154				0.0014536			0.000766888
	0.04522			0.006				0.000924855			0.00171452
	0.17425			0.254				0.00165476			0.00114467
	0.19349			0.206				0.00118206			0.000887088
	0.33639			0.028				0.00256642			0.000841968
	0.17045			0.128				0.0021494			0.000968769
	0.09006			0.072				0.00173429			0.000667565
	0.074			0.457				0.00301135			0.00140255
	0.12096			0.147				0.00378222			0.00102245
	0.08786			0.151				0.0013798			0.00184415
	0.01697			0.047				0.00198706			0.00133196
	0.30064			0.038				0.00120655			0.00196841
	0.09118			0.125				0.00317217			0.000665523
	0.07383			0.136				0.00213038			0.000890255
	0.1675			0.284				0.00168076			0.00205973
	0.14458			0.072				0.00313018			0.00182142
	0.12088			0.02				0.000683613			0.00118113
	0.12162			0.228				0.00136749			0.00214402
	0.17386			0.014				0.000801452			0.00133686
	0.01791			0.465				0.00172553			0.00190207
	0.18128			0.04				0.000991307			0.000798382
	0.03425			0.182				0.000688441			0.00130706
	0.09889			0.106				0.00157448			0.000749983
	0.09285			0.141				0.00124814			0.00110677
	0.12831			0.119				0.000767201			0.0013482
	0.1629			0.251				0.00421243			0.00196727
	0.08203			0.015				0.000920542			0.000973597
	0.15479			0.19				0.0039121			0.000965789
	0.23003			0.248				0.00120007			0.00275775
	-0.00017			0.08				0.0017353			0.00167936
	0.06332			0.341				0.00170892			0.00265102
	0.05227			0.303				0.00144295			0.00112219
	0.04373			0.065				0.00663313			0.000814863
	0.11954			0.223				0.00208154			0.00164764
	0.07043			0.003				0.00120641			0.000770144
	0.03026			0.05				0.00296137			0.000710472
	0.05065			0.133				0.00105815			0.0020516
	0.11251			0.195				0.00137155			0.000659004
	0.00016			0.072				0.00100564			0.00182556
	0.24938			0.259				0.000807278			0.00202811
	0.04153			0.083				0.00285116			0.00168423
	0.09082			0.108				0.00159185			0.00143336
	0.09308			0.052				0.00101236			0.00114175
	0.03854			0.015				0.00162052			0.000955954
	0.03894			0.253				0.00111624			0.00120518
	0.06035			0.017				0.00482465			0.00122752
	0.09649			0.193				0.0011813			0.00152522
	0.04796			0.05				0.00151981			0.00233372
	0.02755			0.073				0.00153732			0.000992507
	0.03651			0.26				0.00390943			0.000996895
	0.11734			0.002				0.00166833			0.00200999
	0.28198			0.081				0.000687428			0.00143244
	0.0155			0.113				0.000688821			0.00156341
	0.0281			0.014				0.00459623			0.00115781
	0.04411			0.031				0.00216373			0.000900947
	0.30907			0.064				0.000931196			0.00239349
	0.2008			0.187				0.00128949			0.00109312
	0.1127			0.04				0.00115632			0.00117555
	0.0754			0.112				0.0014881			0.00131463
	0.2509			0.106				0.00359794			0.00102475
	0.0886			0.178				0.00397768			0.000920504
	0.1084			0.374				0.00443515			0.000812329
	0.0362			0.211				0.00431136			0.00065954
	0.0501			0.024				0.0040407			0.000806421
	0.0367			0.091				0.000839233			0.0015955
	0.0577			0.132				0.00279599			0.00191196
	0.0431			0.229				0.0010423			0.00112859
	0.0891			0.1				0.00176104			0.00088083
	0.1246			0.054				0.0006897			0.00179407
	0.1016			0.11				0.000853822			0.0013932
	0.0728			0.086				0.00356458			0.00192712
	0.0483			0.109				0.00312207			0.00167382
	0.0355			0.05				0.0013127			0.000836968
	0.1186			0.124				0.00128061			0.001369
	0.0906			0.194				0.00134441			0.00136152
	0.0759			0.112				0.00298408			0.00074321
	0.0095			0.061				0.00171209			0.00168583
	0.1373			0.125				0.00456616			0.00150912
	0.0762			0.08				0.00118295			0.00101727
	0.0434			0.074				0.000941969			0.000975333
	0.0921			0.209				0.000800937			0.00147916
	0.0683			0.095				0.00101884			0.000929616
	0.1512			0.076				0.00294273			0.0017761
	0.1414			0.03				0.000717103			0.00147276
	0.065			0.082				0.00133071			0.00114191
	0.0608			0.048				0.00113539			0.00244518
	0.1574			0.027				0.000866383			0.00136495
	0.0679			0.119				0.00424731			0.000672169
	0.0848			0.028				0.000933088			0.00202049
	0.1664			0.048				0.00145018			0.00114062
	0.1382			0.197				0.00408637			0.000897296
	0.0982			0.172				0.00303493			0.000875421
	0.0524			0.046				0.000675619			0.00108407
	0.1367			0.135				0.00170182			0.00125559
	0.0311			0.022				0.00751258			0.000906967
	0.0394			0.04				0.00235652			0.00133312
	0.0769			0.183				0.000885405			0.00111677
	0.153			0.02				0.00110787			0.001233
	0.0708			0.194				0.000867262			0.00121071
	0.0004			0.112				0.00110863			0.00108141
	0.126			0.114				0.00336597			0.000732467
	0.067			0.025				0.000763267			0.00135588
	0.3083			0.061				0.00258532			0.000879109
	0.0966			0.116				0.00141519			0.00210302
	0.1362			0.053				0.000984967			0.00106256
	0.2373			0.237				0.00357892			0.000881456
	0.0403			0.079				0.00150181			0.00121399
	0.0374			0.033				0.000995114			0.000938602
	0.048			0.076				0.000919268			0.000980854
	0.1019			0.064				0.00172021			0.00100295
	0.131			0.054				0.00238202			0.00188274
	0.0778			0.065				0.00133566			0.00124913
	0.0042			0.063				0.00120654			0.00110229
	0.2453			0.021				0.00242348			0.00102596
	0.0491			0.02				0.00160529			0.0017724
	0.042			0.016				0.00114756			0.00111721
	0.0516			0.097				0.00314844			0.00205798
	0.1167			0.044				0.000905193			0.00124453
	0.0241			0.038				0.00324801			0.00110763
	0.1622			0.081				0.000795476			0.00241698
	0.101			0.052				0.00106233			0.00128327
	0.1011			0.019				0.00167023			0.000746526
	0.0545			0.157				0.00450072			0.000672683
	0.0738			0.02				0.00351144			0.000965588
	0.15			0.183				0.00210311			0.00149314
	0.0672			0.035				0.00134175			0.00168334
	0.0574			0.16				0.00115086			0.00127844
	0.0428			0.076				0.0044486			0.000720948
	0.0755			0.224				0.00464696			0.00109297
	0.0672			0.036				0.00201065			0.00140776
	0.082			0.03				0.00269591			0.00096745
	0.4508			0.06				0.000727244			0.000745326
	0.0255			0.101				0.00241753			0.00120597
	0.1594			0.241				0.000915214			0.00137493
	0.0355			0.033				0.00214484			0.0008623
	0.014			0.217				0.00115047			0.00154362
	0.0649			0.072				0.00280157			0.00137573
	0.0292			0.228				0.00182218			0.00133286
	0.0681			0.035				0.00423742			0.000726789
	0.2755			0.051				0.00162521			0.0012737
	0.4147			0.039				0.0012763			0.00170964
	0.1216			0.075				0.00231352			0.00155502
	0.0741			0.075				0.00480727			0.00157823
	0.1761			0.171				0.00191426			0.000670567
	0.0407			0.169				0.00139222			0.00162076
	0.0529			0.088				0.00345234			0.000827625
	0.0402			0.038				0.00445049			0.00151268
	0.3192			0.036				0.00143433			0.00101811
	0.02			0.226				0.00211605			0.00183528
	0.0835			0.261				0.000860676			0.000913732
	0.0511			0.113				0.00132144			0.00131483
	0.0372			0.106				0.00447739			0.000748761
	0.1195			0.034				0.0012404			0.00178258
	0.0297			0.156				0.00155025			0.00106589
	0.1756			0.013				0.00123686			0.000839047
	0.0589			0.109				0.00404324			0.000778049
	0.2283			0.081				0.00299879			0.00170186
	0.0983			0.178				0.00137839			0.002355
	0.1916			0.18				0.00110622			0.00119172
	0.1223			0.061				0.0015727			0.00115467
	0.1348			0.037				0.00469007			0.000971295
	0.1783			0.234				0.00520832			0.00176692
	0.0988			0.048				0.000924714			0.00158656
	0.1531			0.05				0.00147847			0.000744008
	0.1158			0.151				0.000911281			0.00166719
	0.1016			0.051				0.00098104			0.000964053
	0.1627			0.25				0.000733972			0.000921346
	0.1413			0.342				0.00467119			0.000667267
	0.1228			0.138				0.001385			0.00170956
	0.2566			0.121				0.0022255			0.000839226
	0.1679			0.085				0.00699663			0.00196918
	0.0252			0.022				0.00278774			0.00145365
	0.1978			0.153				0.000910394			0.00131426
	0.052			0.073				0.00414154			0.000944018
	0.2071			0.043				0.00102035			0.00138988
	0.0711			0.088				0.00195548			0.00121045
	0.1686			0.088				0.00162901			0.000880353
	0.1648			0.195				0.00104001			0.00184214
	0.019			0.133				0.000818178			0.00154258
	0.1			0.062				0.00149737			0.0016588
	0.0409			0.041				0.0012054			0.00232791
	0.0408			0.091				0.000722297			0.000714764
	0.2602			0.094				0.00359755			0.00183932
	0.0292			0.144				0.00090646			0.00120378
	0.093			0.343				0.00436767			0.00160985
	0.0786			0.246				0.00342024			0.00187241
	0.1134			0.073				0.002494			0.00163081
	0.0263			0.178				0.00174633			0.00162411
	0.1092			0.062				0.00136469			0.00128955
	0.0335			0.217				0.000782162			0.00209851
	0.1437			0.268				0.00429817			0.00194613
	0.0616			0.016				0.00316633			0.001564
	0.0328			0.189				0.00388826			0.00124346
	0.0312			0.057				0.0012541			0.00156315
	0.1048			0.115				0.00121187			0.00137887
	0.0864			0.201				0.0023229			0.00181989
	0.043			0.32				0.00231225			0.00155956
	0.0514			0.027				0.00118104			0.00142261
	0.2791			0.49				0.000889085			0.00168126
	0.1158			0.193				0.00106779			0.000927664
	0.0711			0				0.00247066			0.001206
	0.0433			0.299				0.00552273			0.00225943
	0.2115			0.159				0.000959724			0.000961691
	0.0998			0.162				0.00191083			0.000883408
	0.0672			0.301				0.0027086			0.00106645
	0.1076			0.238				0.000916734			0.00193848
	0.0985			0.046				0.00257467			0.00163462
	0.0202			0.045				0.00286117			0.00123253
	0.0327			0.084				0.00140123			0.00105409
	0.0449			0.038				0.00411604			0.001628
	0.0377			0.1				0.00215968			0.000839964
	0.1001			0.055				0.00112715			0.0016335
	0.0448			0.134				0.000954017			0.00114392
	0.0894			0.119				0.00115783			0.00128729
	0.1455			0.081				0.00111737			0.00131041
	0.0815			0.175				0.00158779			0.0014315
	0.0584			0.046				0.00108363			0.00335199
	0.1065			0.141				0.00420318			0.00088089
	0.0579			0.033				0.00244809			0.00132178
	0.0559			0.454				0.00181001			0.00120171
	0.1134			0.009				0.00634662			0.00234671
	0.1044			0.034				0.00343864			0.000801422
	0.1081			0.119				0.00183448			0.00200041
	0.2155			0.195				0.000875637			0.00102847
	0.0797			0.023				0.00346807			0.000972487
	0.056			0.082				0.00396385			0.00128523
	0.0221			0.401				0.000923075			0.000843257
	0.0715			0.195				0.00349838			0.00111362
	0.0247			0.071				0.00200976			0.00152924
	0.1581			0.009				0.00098294			0.000820749
	0.2612			0.275				0.000817426			0.000917338
	0.0474			0.062				0.00393061			0.00158972
	0.0995			0.143				0.00225213			0.000886306
	0.0916			0.053				0.00117357			0.00129351
	0.0736			0.103				0.00124333			0.00150498
	0.0778			0.271				0.00129888			0.00148214
	0.3312			0.12				0.00075528			0.000801899
	0.1163			0.034				0.00103938			0.00271127
	0.2734			0.185				0.000877798			0.00126375
	0.0168			0.147				0.00123242			0.0015376
	0.2211			0.096				0.00200659			0.0013112
	0.1101			0.252				0.000960618			0.00171813
	0.0643			0.032				0.000774547			0.00105819
	0.3815			0.113				0.00086917			0.00146505
	0.0412			0.416				0.00102593			0.00249309
	0.0729			0.151				0.00202853			0.00225481
	0.0681			0.466				0.00143611			0.000798315
	0.0988			0.054				0.000760987			0.00117463
	0.0543			0.203				0.00387646			0.00143251
	0.0411			0.054				0.000828072			0.000881441
	0.1079			0.334				0.00252114			0.00135837
	0.111			0.16				0.000696167			0.00109954
	0.0503			0.078				0.000885285			0.00106629
	0.2039			0.106				0.00163827			0.00203787
	0.0346			0.074				0.00298851			0.000818439
	0.028			0.418				0.00146262			0.00136592
	0.0793			0.084				0.00179186			0.00120793
	0.1558			0.026				0.00165983			0.000888884
	0.048			0.106				0.0019551			0.00207432
	0.0695			0.088				0.000798017			0.000676408
	0.1024			0.307				0.00330166			0.000979312
	0.1939			0.056				0.00129355			0.00128204
	0.0581			0.055				0.000963911			0.00114271
	0.0096			0.109				0.00512625			0.00141338
	0.1815			0.147				0.00119678			0.00131484
	0.0658			0.148				0.00203271			0.000766881
	0.2733			0.253				0.00169256			0.000982031
	0.1165			0.185				0.00450363			0.00123735
	0.1521			0.047				0.000902914			0.0010668
	0.1263			0.16				0.00103849			0.000781968
	0.0639			0.092				0.00446165			0.000783764
	0.0659			0.027				0.00142748			0.000738762
	0.0509			0.349				0.00157131			0.000931114
	0.1155			0.06				0.00136317			0.0015913
	0.0287			0.067				0.00248411			0.000958189
	0.0983			0.062				0.00111307			0.00163812
	0.1005			0.199				0.00105421			0.000748172
	0.0954			0.504				0.00131651			0.00110503
	0.0671			0.001				0.00112677			0.00235006
	0.0742			0.177				0.00103303			0.00116645
	0.318			0.195				0.00272559			0.000695854
	0.0702			0.015				0.00372768			0.000705421
	0.5543			0.104				0.0015032			0.00081946
	0.4186			0.088				0.00135329			0.00190896
	0.1696			0.049				0.00108428			0.00117326
	0.2089			0.086				0.00368989			0.00119798
	0.0946			0.68				0.00109049			0.000976034
	0.0476			0.09				0.00374582			0.0010928
	0.0327			0.095				0.00174189			0.000712521
	0.0423			0.154				0.00141785			0.000933245
	0.0759			0.037				0.00195979			0.000971437
	0.0298			0.128				0.00171793			0.00317588
	0.1236			0.046				0.00239279			0.000874244
	0.0467			0.25				0.0037443			0.00112052
	0.0628			0.364				0.00428752			0.00153926
	0.0944			0.038				0.00200216			0.00168882
	0.2868			0.061				0.0020421			0.00087066
	0.0316			0.214				0.00123051			0.000922933
	0.0399			0.188				0.0018705			0.00140268
	0.1558			0.493				0.00121643			0.00113068
	0.0947			0.05				0.00104178			0.00108109
	0.1876			0.279				0.00180252			0.00084243
	0.1425			0.268				0.00235766			0.00267813
	0.2086			0.123				0.00168101			0.00076247
	0.0708			0.178				0.00129075			0.00106359
	0.0541			0.078				0.00207317			0.00161093
	0.2083			0.038				0.00126766			0.00190747
	0.0649			0.031				0.000768974			0.00112327
	0.0354			0.179				0.000999294			0.00101396
	0.1546			0.172				0.00108135			0.00119077
	0.0425			0.023				0.000900112			0.000701241
	0.0689			0.044				0.00094451			0.00120565
	0.0261			0.071				0.00119296			0.000796996
	0.0169			0.039				0.0021565			0.000895023
	0.0809			0.079				0.00114084			0.000794783
	0.029			0.025				0.0028121			0.00290023
	0.1134			0.215				0.00215017			0.0010376
	0.0163			0.238				0.00253205			0.00141829
	0.036			0.013				0.00131232			0.000827149
	0.0395			0.024				0.00129557			0.00136279
	0.0602			0.266				0.00173415			0.00158158
	0.1555			0.056				0.00136622			0.00120515
	0.0226			0.014				0.000944629			0.00165197
	0.026			0.105				0.00100552			0.000901386
	0.135			0.057				0.0056734			0.00242881
	0.0721			0.031				0.00228892			0.00134644
	0.1398			0.055				0.00422829			0.000925235
	0.0674			0.153				0.00240269			0.000701249
	0.0444			0.075				0.00537598			0.00117623
	0.1836			0.063				0.00109088			0.00189409
	0.3261			0.036				0.00225759			0.00142571
	0.1967			0.324				0.0009128			0.0026013
	0.0759			0.117				0.000913054			0.00141682
	0.0909			0.039				0.00103709			0.00126425
	0.0879			0.032				0.00275781			0.0016351
	0.0663			0.203				0.00225657			0.00122569
	0.0225			0.055				0.0009818			0.00122075
	0.0272			0.084				0.00237161			0.00127821
	0.0508			0.101				0.00106905			0.00137547
	0.2425			0.076				0.00184665			0.00107565
	0.1478			0.071				0.00220889			0.000694014
	0.251			0.174				0.0048112			0.00127161
	0.1099			0.083				0.000915334			0.000762507
	0.0099			0.084				0.002823			0.00239292
	0.2341			0.087				0.00153858			0.000827193
	0.0909			0.039				0.00468869			0.00151841
	0.0865			0.1				0.000688687			0.00339742
	0.0233			0.176				0.0049459			0.00150257
	0.3069			0.17				0.00122227			0.00433546
	0.0251			0.034				0.00108276			0.00330991
	0.2235			0.037				0.00509036			0.00217932
	0.2479			0.196				0.0021073			0.00395434
	0.0366			0.03				0.00194317			0.00154088
	0.2361			0.393				0.00190804			0.00290569
	0.1053			0.046				0.00232518			0.00258608
	0.0854			0.269				0.00117699			0.00179034
	0.1013			0.032				0.0028211			0.00128087
	0.0488			0.213				0.000732578			0.00112131
	0.0259			0.026				0.0021092			0.000835814
	0.0474			0.039				0.00204045			0.000806391
	0.1266			0.02				0.00132006			0.000712782
	0.0361			0.108				0.0022411			0.0025351
	0.0653			0.019				0.00204375			0.00182928
	0.167			0.02				0.00410501			0.000727117
	0.3744			0.155				0.00157283			0.0065148
	0.0298			0.608				0.000973307			0.00540211
	0.0441			0.036				0.00310849			0.000752613
	0.3651			0.281				0.00100538			0.000835188
	0.0373			0.054				0.00120477			0.000865877
	0.075			0.022				0.00111294			0.000822119
	0.0321			0.078				0.00520197			0.000830486
	0.0703			0.041				0.0010584			0.002035
	0.0181			0.048				0.000864856			0.00246737
	0.0871			0.081				0.00659128			0.000778735
	0.2235			0.191				0.00138462			0.00191108
	0.0449			0.073				0.00412479			0.000880331
	0.2269			0.112				0.00168926			0.00138639
	0.0705			0.203				0.00251759			0.00111612
	0.5598			0.082				0.0019187			0.0012943
	0.0264			0.136				0.000747666			0.000775576
	0.1344			0.074				0.00492662			0.00147746
	0.104			0.049				0.00326006			0.00131816
	0.0936			0.096				0.00291572			0.0026065
	0.0381			0.066				0.00448398			0.000686027
	0.0589			0.046				0.00127947			0.00217096
	0.1856			0.058				0.0016663			0.00185542
	0.0259			0.053				0.00241296			0.00148417
	0.1014			0.141				0.00506753			0.00118359
	0.1555			0.131				0.00120159			0.00100476
	0.0703			0.017				0.00068488			0.000840887
	0.0918			0.325				0.0020402			0.00140338
	0.0628			0.096				0.00151321			0.00098332
	0.0523			0.224				0.000857115			0.00152895
	0.1485			0.156				0.00109709			0.000710122
	0.1741			0.646				0.00558614			0.00181305
	0.0732			0.039				0.00237795			0.00110153
	0.0919			0.098				0.00127591			0.00205567
	0.0459			0.185				0.00479104			0.00392846
	0.0328			0.061				0.000669546			0.0046396
	0.2051			0.024				0.00252888			0.0045942
	0.3007			0.027				0.000891112			0.00252013
	0.0491			0.145				0.00130711			0.00142228
	0.193			0.033				0.00195776			0.00118421
	0.0724			0.11				0.00747389			0.00119564
	0.1197			0.164				0.00243718			0.00176612
	0.0506			0.184				0.00158831			0.001965
	0.1211			0.09				0.00377664			0.00105929
	0.1844			0.056				0.0037533			0.00147846
	0.2475			0.047				0.00127935			0.0069719
	0.0593			0.054				0.0027086			0.000772394
	0.2308			0.061				0.0011662			0.00179757
	0.0917			0.189				0.00163004			0.00145666
	0.0886			0.077				0.00134263			0.00257086
	0.1377			0.109				0.0014077			0.002191
	0.041			0.125				0.00130103			0.00104787
	0.0303			0.056				0.000994094			0.00286359
	0.0332			0.103				0.00224312			0.00169129
	0.0721			0.182				0.00110063			0.0037254
	0.1244			0.028				0.0010078			0.00190703
	0.0615			0.036				0.00382496			0.00114642
	0.1697			0.076				0.00142596			0.00239571
	0.0896			0.23				0.00169142			0.00183258
	0.0901			0.022				0.00160962			0.00151563
	0.0969			0.069				0.000897452			0.00177678
	0.1465			0.116				0.000931822			0.00642424
	0.4672			0.132				0.00100259			0.000868917
	0.0206			0.056				0.00116126			0.00102986
	0.023			0.054				0.000753753			0.00228257
	0.1426			0.013				0.000897579			0.00148557
	0.0331			0.03				0.00324155			0.00116165
	0.3332			0.032				0.00225695			0.0013808
	0.0825			0.085				0.00155266			0.000869043
	0.0285			0.049				0.000837587			0.00193392
	0.0261			0.045				0.00127605			0.000922188
	0.0226			0.05				0.0043966			0.00143965
	0.0392			0.112				0.00141276			0.00326286
	0.0724			0.065				0.0039674			0.00128974
	0.0387			0.109				0.00128543			0.000763394
	0.1349			0.126				0.00166111			0.000803217
	0.0762			0.021				0.00135925			0.000999548
	0.0773			0.131				0.000887431			0.00188889
	0.1569			0.098				0.000918761			0.00232569
	0.1054			0.267				0.00293195			0.00164042
	0.1167			0.065				0.00121516			0.00143357
	0.0595			0.086				0.00225607			0.00162432
	0.0709			0.04				0.00250821			0.00236172
	0.0522			0.029				0.000980906			0.00186835
	0.0577			0.061				0.00107756			0.000897199
	0.1944			0.041				0.00245152			0.00129621
	0.0715			0.057				0.000739671			0.00341251
	0.0488			0.055				0.00201217			0.00131562
	0.0278			0.062				0.000917241			0.0011364
	0.1184			0.053				0.00427496			0.00248753
	0.0692			0.109				0.00157017			0.00143927
	0.2109			0.106				0.00091394			0.00155659
	0.1512			0.068				0.00107577			0.000991061
	0.1392			0.139				0.00179656			0.00159021
	0.1418			0.046				0.00224313			0.00119183
	0.1619			0.115				0.0013893			0.00105447
	0.1643			0.032				0.00394038			0.000852428
	0.0357			0.039				0.00215169			0.00258912
	0.0689			0.037				0.00259279			0.00115733
	0.0892			0.039				0.00109962			0.00146477
	0.1284			0.04				0.00345551			0.00180277
	0.083			0.041				0.00138588			0.00136293
	0.0573			0.042				0.00262324			0.00203666
	0.0649			0.046				0.00192301			0.000942729
	0.1768			0.048				0.00113273			0.00125397
	0.1413			0.078				0.00240941			0.00265343
	0.046			0.016				0.00221853			0.00203246
	0.1271			0.035				0.000745766			0.00133819
	0.0444			0.129				0.00390399			0.00120007
	0.0352			0.032				0.00228372			0.00247359
	0.06			0.249				0.00156395			0.00219709
	0.0514			0.012				0.00447307			0.000777602
	0.0832			0.024				0.00247079			0.000961758
	0.027			0.136				0.00196741			0.00135824
	0.2947			0.102				0.00109836			0.000875637
	0.0733			0.356				0.000992067			0.00111953
	0.2919			0.093				0.00112829			0.00229615
	0.1155			0.03				0.00112879			0.00110368
	0.0716			0.014				0.00138588			0.00284633
	0.0565			0.058				0.0011756			0.00075084
	0.0801			0.088				0.00118954			0.00283987
	0.0869			0.095				0.00139057			0.00177373
	0.0905			0.176				0.00376561			0.0018223
	0.0984			0.415				0.0010149			0.00453459
	0.0852			0.074				0.00320261			0.00210375
	0.0767			0.058				0.000672072			0.000793703
	0.1782			0.06				0.00213318			0.000697441
	0.1358			0.104				0.000756547			0.00275452
	0.0578			0.146				0.0028887			0.0111336
	0.0842			0.083				0.00135417			0.00187328
	0.1508			0.073				0.00161266			0.00591172
	0.0333			0.027				0.00144283			0.00261322
	0.1357			0.047				0.00104813			0.00327477
	0.0678			0.064				0.00103799			0.00286308
	0.1153			0.087				0.00110063			0.00290671
	0.0635			0.072				0.00103164			0.00160214
	0.0649			0.017				0.000819325			0.00267892
	0.2475			0.044				0.00215536			0.00252926
	0.0266			0.089				0.00145171			0.00231618
	0.0452			0.094				0.00326665			0.00347314
	0.066			0.02				0.00110242			0.00297343
	0.0636			0.196				0.000964671			0.0010513
	0.1603			0.219				0.00178413			0.000992194
	0.0418			0.072				0.000977352			0.00176549
	0.0376			0.105				0.00265939			0.00728263
	0.0872			0.075				0.0043815			0.00214775
	0.1046			0.072				0.00105245			0.00112613
	0.0353			0.057				0.00104521			0.00196283
	0.0616			0.095				0.000992827			0.00656287
	0.1632			0.27				0.00310811			0.00139806
	0.1093			0.047				0.00075274			0.00206126
	0.039			0.05				0.00402104			0.00144308
	0.0263			0.085				0.000919893			0.000997901
	0.3345			0.021				0.0086524			0.00227712
	0.1653			0.063				0.00143052			0.00120033
	0.0243			0.036				0.00094451			0.00274652
	0.0849			0.059				0.000752479			0.000863336
	0.1433			0.037				0.0021125			0.006148
	0.029			0.118				0.00167417			0.00388863
	0.0423			0.229				0.00146324			0.00167455
	0.2002			0.024				0.00220545			0.00116393
	0.045			0.027				0.00196651			0.00189105
	0.1166			0.104				0.00079675			0.00110786
	0.1855			0.052				0.00131816			0.000779755
	0.0331			0.124				0.00122607			0.00108656
	0.0673			0.001				0.00170955			0.00171577
	0.0399			0.065				0.0013075			0.0033633
	0.0859			0.067				0.00198249			0.00109138
	0.0754			0.153				0.00457682			0.00182319
	0.1765			0.055				0.00278799			0.00142456
	0.0601			0.039				0.00111256			0.00108947
	0.0904			0.158				0.000835694			0.00114427
	0.0321			0.209				0.00203297			0.00227597
	0.0679			0.231				0.00716835			0.00197679
	0.0683			0.055				0.00128593			0.0013524
	0.107			0.181				0.00370955			0.0023815
	0.0869			0.053				0.00180303			0.00164309
	0.0557			0.081				0.00102036			0.00152107
	0.0545			0.265				0.0013127			0.00215713
	0.0317			0.044				0.00129938			0.00129963
	0.2614			0.084				0.000762887			0.00238987
	0.0908			0.059				0.000673212			0.0022931
	0.0726			0.079				0.00351601			0.0013368
	0.0191			0.12				0.00146896			0.00262325
	0.0484			0.086				0.00120806			0.00205681
	0.0639			0.103				0.00068666			0.0013283
	0.0512			0.021				0.00132106			0.00137662
	0.0657			0.002				0.00268438			0.00161202
	0.0644			0.138				0.000946157			0.000767082
	0.0623			0.014				0.000969879			0.000891998
	0.0788			0.043				0.00203919			0.00309594
	0.0623			0.02				0.00136051			0.00103658
	0.0616			0.067				0.00286549			0.00268831
	0.3859			0.107				0.00587265			0.00184514
	0.1729			0.064				0.00257276			0.00107705
	0.0634			0.015				0.000904813			0.00137523
	0.0926			0.076				0.00334593			0.00255413
	0.2157			0.029				0.00237389			0.00312638
	0.1982			0.076				0.00133616			0.00158373
	0.101			0.023				0.00307996			0.000882104
	0.0496			0.029				0.00541592			0.00136419
	0.228			0.062				0.00166085			0.00176447
	0.0993			0.075				0.000736885			0.00129253
	0.1097			0.089				0.000935629			0.00134669
	0.0689			0.103				0.000800677			0.00115797
	0.0443			0.059				0.000888824			0.00306562
	0.0755			0.029				0.00170258			0.00191654
	0.174			0.023				0.00190931			0.00076542
	0.0341			0.061				0.00242273			0.000783183
	0.0152			0.054				0.00136736			0.00146122
	0.1343			0.022				0.000736892			0.00112321
	0.202			0.096				0.00175597			0.00333553
	0.1435			0.057				0.0012012			0.00183867
	0.0615			0.066				0.00127047			0.00165477
	0.3809			0.078				0.000727117			0.00126781
	0.2045			0.137				0.00424542			0.00124916
	0.1057			0.032				0.000781663			0.00129926
	0.1058			0.077				0.00116545			0.00144803
	0.0859			0.181				0.000945903			0.00106157
	0.0114			0.027				0.000990927			0.00118295
	0.1075			0.033				0.000672966			0.00204134
	0.0394			0.212				0.00249172			0.00161176
	0.0343			0.048				0.00135798			0.00160695
	0.0492			0.074				0.00134847			0.0010749
	0.1419			0.063				0.00213064			0.00228156
	0.1094			0.253				0.0030518			0.000710122
	0.0458			0.048				0.00126323			0.00596131
	0.0387			0.009				0.00205377			0.00152768
	0.0246			0.031				0.000912048			0.00162724
	0.1142			0.033				0.00180417			0.00239862
	0.0356			0.131				0.00197513			0.00266154
	0.0219			0.05				0.00423299			0.00210615
	0.2242			0.194				0.00114655			0.00108377
	0.0481			0.08				0.0037476			0.000718497
	0.0339			0.113				0.000996508			0.00199226
	0.2319			0.119				0.000867143			0.00146756
	0.1118			0.057				0.00131993			0.00176853
	0.0382			0.091				0.00133616			0.000758827
	0.1766			0.04				0.00824579			0.000876524
	0.1731			0.232				0.00276198			0.00106995
	0.0616			0.026				0.00135519			0.00293258
	0.0259			0.022				0.00462477			0.00125536
	0.0512			0.101				0.00188369			0.00195192
	0.194			0.031				0.00147631			0.00313463
	0.1704			0.089				0.00117002			0.000929289
	0.2674			0.036				0.000817806			0.000934616
	0.0348			0.039				0.000727758			0.00185782
	0.2377			0.026				0.00113425			0.00116862
	0.0979			0.045				0.0014616			0.00157943
	0.0419			0.082				0.00479636			0.00214218
	0.0297			0.105				0.00095503			0.00135265
	0.0728			0.024				0.00278723			0.00169332
	0.0726			0.136				0.00140198			0.00165413
	0.0384			0.054				0.00438479			0.00106969
	0.0174			0.157				0.0016351			0.000837713
	0.0678			0.127				0.00104305			0.00191223
	0.0185			0.103				0.0037221			0.00168774
	0.0769			0.078				0.00226001			0.000979647
	0.0351			0.088				0.00293855			0.00151283
	0.0417			0.019				0.000906967			0.00193138
	0.0327			0.089				0.0020766			0.00152475
	0.0939			0.054				0.00159591			0.00111371
	0.0317			0.162				0.000866503			0.00178413
	0.0287			0.051				0.00320857			0.000941209
	0.0679			0.038				0.00151614			0.00270987
	0.0427			0.046				0.00178616			0.00120591
	0.0802			0.084				0.0034337			0.00172199
	0.0867			0.059				0.00398617			0.000924088
	0.0883			0.008				0.000827827			0.00138892
	0.0122			0.02				0.00142457			0.00556356
	0.1265			0.021				0.00120389			0.00119703
	0.0244			0.008				0.000813872			0.00168508
	0.0525			0.049				0.00237935			0.00217869
	0.1234			0.041				0.00113995			0.00135937
	0.0693			0.009				0.00211605			0.000712529
	0.0509			0.097				0.00357182			0.000879064
	0.0502			0.027				0.00101591			0.00114706
	0.033			0.053				0.00107248			0.00144891
	0.3681			0.08				0.00205288			0.000996634
	0.1268			0.033				0.00135645			0.00145512
	0.3116			0.05				0.00137079			0.00178958
	0.0476			0.015				0.00206075			0.000778615
	0.0381			0.026				0.00372173			0.0008348
	0.0283			0.044				0.000725724			0.00108529
	0.0236			0.044				0.00116278			0.00071431
	0.073			0.037				0.00120515			0.00224885
	0.0168			0.025				0.000844821			0.00115149
	0.1098			0.027				0.00239697			0.00344967
	0.0122			0.026				0.00120641			0.00205326
	0.0225			0.218				0.000792697			0.0012352
	0.0172			0.047				0.00462336			0.00181279
	0.0152			0.183				0.00102416			0.000707336
	0.0591			0.185				0.00140224			0.00197145
	0.087			0.035				0.000767581			0.000738785
	0.0464			0.03				0.00108111			0.000952117
	0.0333			0.044				0.00129279			0.000739925
	0.0264			0.064				0.00223641			0.00216374
	0.0788			0.057				0.00122443			0.00596765
	0.0494			0.202				0.00083594			0.000706829
	0.0499			0.057				0.000882111			0.000805624
	0.0807			0.109				0.000680193			0.000993207
	0.0312			0.024				0.00157803			0.000720017
	0.0338			0.061				0.00121352			0.000675753
	0.1341			0.072				0.00434776			0.00138068
	0.028			0.058				0.00282046			0.00156382
	0.1718			0.083				0.00107197			0.000717729
	0.034			0.119				0.00228447			0.00139907
	0.1013			0.143				0.00157182			0.000661299
	0.0608			0.078				0.00216944			0.00643781
	0.0431			0.073				0.000891238			0.00206886
	0.1081			0.035				0.00106575			0.000713304
	0.0302			0.095				0.000748172			0.00244086
	0.2073			0.112				0.00100589			0.00169116
	0.0608			0.182				0.000914581			0.00100133
	0.0568			0.086				0.00423526			0.00161215
	0.0333			0.099				0.000813611			0.000972539
	0.1065			0.124				0.00281806			0.00974835
	0.0302			0.031				0.000934996			0.00602028
	0.0478			0.044				0.0020648			0.00310849
	0.0605			0.074				0.00193772			0.00319626
	0.0759			0.127				0.0011586			0.00214116
	0.0963			0.209				0.000758067			0.000703149
	0.0998			0.225				0.00381432			0.000898086
	0.0269			0.048				0.00122417			0.00100704
	0.0667			0.234				0.0022548			0.000889085
	0.0426			0.163				0.00152324			0.000929542
	0.0348			0.044				0.000852682			0.000927635
	0.1681			0.001				0.0018681			0.00146173
	0.1417			0.111				0.00409029			0.000919528
	0.0269			0.103				0.000666238			0.00067322
	0.0554			0.088				0.00130749			0.00261208
	0.033			0				0.00125613			0.00185338
	0.0799			0.081				0.00108656			0.00136787
	0.0123			0.11				0.00139869			0.000882484
	0.0085			0.045				0.00129152			0.00103545
	0.0305			0.054				0.00215282			0.00126868
	0.1294			0.04				0.000829592			0.000680819
	0.0494			0.048				0.00235055			0.00100209
	0.0438			0.089				0.00090684			0.00264544
	0.0126			0.019				0.00244885			0.000804737
	0.0589			0.022				0.00195269			0.00181153
	0.4657			0.075				0.00203183			0.00141442
	0.0275			0.104				0.00200342			0.00172959
	0.1214			0.136				0.00132463			0.00075122
	0.0665			0.124				0.000849009			0.000662811
	0.0589			0.038				0.00112981			0.000698842
	0.0899			0.054				0.00468995			0.00281006
	0.035			0.426				0.00435613			0.00289441
	0.0379			0.047				0.00246052			0.000943236
	0.0462			0.067				0.00193518			0.00113108
	0.0837			0.088				0.00128518			0.00183081
	0.0489			0.026				0.00196778			0.00214649
	0.099			0.082				0.00124763			0.00287969
	0.0785			0.033				0.0024973			0.000959858
	0.1423			0.289				0.00146718			0.00791717
	0.1367			0.089				0.00152539			0.00329354
	0.0131			0.118				0.00235194			0.000929408
	0.0605			0.1				0.00123558			0.00102036
	0.1029			0.015				0.0010839			0.000927009
	0.0273			0.241				0.00146286			0.00140604
	0.1993			0.022				0.00180683			0.00091026
	0.0893			0.072				0.00075908			0.000836581
	0.0514			0.048				0.00346869			0.00135823
	0.0399			0.104				0.000739671			0.00101972
	0.0577			0.196				0.00110318			0.000977099
	0.0413			0				0.00180633			0.00166859
	0.0818			0.053				0.00101718			0.00125728
	0.1071			0.045				0.00494082			0.0028457
	0.0876			0.047				0.00406759			0.000804484
	0.1072			0.222				0.00289986			0.0016247
	0.174			0.083				0.000989527			0.00108098
	0.0484			0.073				0.00136533			0.00100298
	0.0999			0				0.00100868			0.000987381
	0.2103			0.094				0.00450135			0.00329988
	0.0652			0.027				0.00221244			0.00211199
	0.1397			0.18				0.00159046			0.00116139
	0.0406			0.02				0.00103824			0.00232988
	0.0387			0.025				0.0011813			0.00188978
	0.0704			0.168				0.000854835			0.000711136
	0.1006			0.04				0.000906073			0.00116469
	0.0394			0.033				0.00366871			0.00187596
	0.0268			0.105				0.00225645			0.000684887
	0.1295			0.047				0.00246712			0.00181533
	0.0431			0.01				0.000756159			0.00126996
	0.0827			0.08				0.00182028			0.0058294
	0.1599			0.059				0.0010948			0.00407114
	0.0672			0.069				0.00169877			0.000989787
	0.0258			0.076				0.00144561			0.00104077
	0.0535			0.051				0.000703149			0.00190487
	0.1212			0.226				0.00292256			0.00209588
	0.0484			0.025				0.000700109			0.00144181
	0.2467			0.065				0.00118738			0.00109544
	0.2081			0.079				0.00317267			0.00072255
	0.0213			0.128				0.00131904			0.000921302
	0.1394			0.026				0.00516683			0.00189409
	0.0468			0				0.000864729			0.00112055
	0.0261			0.085				0.000782922			0.000736259
	0.0273			0.029				0.000908613			0.000862837
	0.0395			0.038				0.00124091			0.00221966
	0.3003			0.009				0.00114515			0.00122252
	0.001			0.189				0.00124028			0.000951231
	0.0301			0.144				0.000684254			0.000996761
	0.2105			0.049				0.00214776			0.000960112
	0.0654			0.041				0.00133832			0.00181191
	0.0814			0.142				0.00120286			0.00117408
	0.1186			0.035				0.00499003			0.00160999
	0.0503			0.121				0.00133857			0.000748932
	0.0873			0.171				0.00226405			0.00135252
	0.0444			0.027				0.00276783			0.00101084
	0.1065			0.083				0.00150852			0.000660911
	0.0362			0.051				0.000963278			0.00141707
	0.09			0.125				0.0014621			0.00147276
	0.1114			0.056				0.000896685			0.00106791
	0.0239			0.196				0.000995107			0.000770867
	0.0136			0.036				0.00418783			0.00109366
	0.0425			0.039				0.000883117			0.00069274
	0.2293			0.162				0.00068552			0.00135557
	0.4093			0.052				0.00207052			0.000949204
	0.0544			0.022				0.00112778			0.00238442
	0.0805			0.048				0.00119577			0.00117572
	0.1027			0.171				0.00105879			0.00168367
	0.0202			0.032				0.00123305			0.000666752
	0.1001			0.033				0.00107819			0.00191959
	0.1534			0.197				0.00207355			0.000902653
	0.1082			0.019				0.00166276			0.000936516
	0.0699			0.027				0.00499942			0.000790417
	0.0521			0.061				0.00182547			0.00161342
	0.1454			0.059				0.000936262			0.00123444
	0.1202			0.071				0.00305472			0.00220381
	0.0524			0.067				0.000672571			0.00248118
	0.0095			0.052				0.000899225			0.00224794
	0.2525			0.043				0.00697888			0.000937149
	0.0762			0.639				0.0021702			0.00132931
	0.0324			0.073				0.00108466			0.000875384
	0.1302			0.076				0.00452875			0.001394
	-0.0002			0.219				0.00495008			0.00152425
	0.1935			0.074				0.00288287			0.00918256
	0.0816			0				0.00105751			0.00821497
	0.1291			0.064				0.00171742			0.00075274
	0.3007			0.522				0.00144043			0.00114147
	0.0518			0.205				0.00515098			0.003507
	0.0243			0.095				0.00165223			0.000921682
	0.0288			0.026				0.00118003			0.00102746
	0.0232			0.074				0.00118916			0.00278521
	0.1291			0.044				0.00388318			0.002659
	0.0664			0.032				0.00170156			0.00210615
	0.1556			0.05				0.000821739			0.00146046
	0.2124			0.049				0.00293956			0.00198402
	0.0531			0.026				0.00137053			0.000837594
	0.0636			0.132				0.00157828			0.00274082
	0.1642			0.122				0.00934578			0.00068552
	0.127			0.102				0.00341339			0.00746704
	0.0381			0.072				0.00128707			0.00309557
	0.0409			0.072				0.00133971			0.00142393
	0.134			0.042				0.00233762			0.000766434
	0.0253			0.068				0.00111991			0.00787633
	0.0944			0.083				0.00333793			0.00184005
	0.0584			0.263				0.00123432			0.000684254
	0.0861			0.215				0.00128835			0.00095541
	0.0944			0.047				0.000827439			0.00141656
	0.0876			0.182				0.00165869			0.00136521
	0.0396			0.04				0.00121885			0.00242387
	0.0552			0.058				0.00130052			0.00122074
	0.0802			0.031				0.000938043			0.00179123
	0.0272			0.072				0.00154252			0.000867017
	0.0895			0.137				0.00214002			0.00128809
	0.0883			0.131				0.00139006			0.00111877
	0.0338			0.074				0.00127909			0.00171018
	0.0281			0.036				0.00486942			0.000969499
	0.0924			0.139				0.0026774			0.00187113
	0.1043			0.176				0.00168812			0.00127453
	0.1313			0.015				0.00192999			0.00101325
	0.0737			0.239				0.00279142			0.00146934
	0.0497			0.232				0.0019263			0.00147326
	0.0496			0.059				0.00176066			0.000963919
	0.0422			0				0.00120971			0.000662051
	0.1714			0.057				0.00205884			0.00247131
	0.0371			0.071				0.00118663			0.00107007
	0.0335			0.045				0.00354568			0.00080575
	0.0797			0.1				0.00145715			0.00207685
	0.0392			0.261				0.00232925			0.00266624
	0.1082			0.06				0.0046443			0.00181013
	0.0973			0.177				0.00328518			0.00182116
	0.1654			0.053				0.00182268			0.00105067
	0.1416			0.288				0.00193404			0.00269808
	0.1296			0.283				0.00237187			0.00167885
	0.1373			0.13				0.00154087			0.000668392
	0.1611			0.075				0.000809565			0.0156346
	0.0397			0.09				0.00230172			0.0085498
	0.0748			0.115				0.00503164			0.00461512
	0.0758			0.156				0.00099878			0.00453941
	0.1545			0.053				0.00215144			0.00315302
	0.0537			0.057				0.00146084			0.00133768
	0.0395			0.035				0.00322798			0.000835434
	0.0742			0.028				0.00208472			0.00273359
	0.0175			0.032				0.00114845			0.00236882
	0.0851			0.053				0.00107057			0.00395599
	0.2263			0.053				0.00157321			0.000671312
	0.138			0.034				0.00105841			0.00683822
	0.1022			0.058				0.00168913			0.0010012
	0.1426			0.03				0.00163066			0.0012248
	0.0333			0.04				0.00218605			0.000775442
	0.0397			0.198				0.00160022			0.0013907
	0.0795			0.039				0.00187761			0.00134744
	0.0424			0.11				0.00236197			0.00136521
	0.0705			0.092				0.00244036			0.000804104
	0.1028			0.123				0.00127643			0.0017287
	0.018			0.087				0.00242246			0.00107881
	0.1816			0.066				0.000900745			0.00129469
	0.065			0.102				0.00476985			0.00338221
	0.0949			0.205				0.00194799			0.00126261
	0.0793			0.123				0.00102288			0.000835314
	0.0144			0.087				0.00112929			0.000769988
	0.0193			0.1				0.00219024			0.000897199
	0.1521			0.16				0.00354974			0.00158373
	0.014			0.215				0.00572768			0.00971169
	0.2031			0.081				0.000842281			0.00196739
	0.038			0.084				0.00105903			0.000895545
	0.0441			0.051				0.000812851			0.00134986
	0.0853			0.062				0.00133299			0.00173491
	0.1057			0.036				0.00234282			0.000775702
	0.0705			0.181				0.0038015			0.00106614
	0.0309			0.105				0.00359806			0.00262883
	0.3425			0.028				0.00418148			0.00117838
	0.1616			0.016				0.00584665			0.00143065
	0.0196			0.011				0.00390423			0.00268336
	0.024			0.035				0.000898845			0.00203728
	0.1317			0.363				0.00362876			0.00128543
	0.194			0.121				0.00398058			0.000889465
	0.0243			0.04				0.00249844			0.000707842
	0.0941			0.093				0.00102428			0.00113665
	0.0721			0.158				0.00230857			0.00226494
	0.1349			0.112				0.000837341			0.00143521
	0.0864			0.053				0.00208218			0.00101541
	0.0303			0.296				0.0015297			0.00298966
	0.2574			0.03				0.00123799			0.00137472
	0.0724			0.072				0.00180252			0.00119272
	0.247			0.05				0.000901259			0.00139158
	0.0203			0.111				0.00250909			0.00134985
	0.1342			0.018				0.00068108			0.00514921
	0.1348			0.057				0.0010981			0.00156344
	0.032			0.48				0.00305814			0.00266927
	0.1027			0.087				0.00121795			0.0014725
	0.1545			0.132				0.00138854			0.00141796
	0.0245			0.034				0.00507514			0.00198541
	0.0254			0.289				0.000845581			0.00157599
	0.0526			0.016				0.00103151			0.0009166
	0.0618			0.019				0.000982434			0.00174291
	0.0386			0.043				0.0011865			0.000891738
	0.1363			0.148				0.00374037			0.00209752
	0.0749			0.111				0.00277518			0.00186048
	0.1253			0.063				0.00278369			0.00400037
	0.0161			0.045				0.00209106			0.000730164
	0.0216			0.106				0.000967212			0.00282465
	0.2595			0.066				0.00283201			0.00201179
	0.0488			0.321				0.00136457			0.000875764
	0.0733			0.054				0.000937149			0.00123914
	0.1438			0.05				0.00194876			0.00235613
	0.0407			0.095				0.00167556			0.000904806
	0.2178			0.102				0.00384577			0.000818819
	0.0308			0.176				0.00170004			0.00150219
	0.3964			0.044				0.000971273			0.0015576
	0.0107			0.08				0.00134327			0.000947431
	0.082			0.172				0.00300653			0.00228473
	0.0868			0.009				0.00293259			0.00161252
	0.1765			0.036				0.00400671			0.00184957
	0.0471			0.162				0.00279573			0.00134377
	0.1149			0.3				0.00273397			0.000776201
	0.1174			0.119				0.000923447			0.00220102
	0.1451			0.037				0.000991188			0.000949457
	0.0488			0.081				0.00274614			0.00154302
	0.0279			0.03				0.00618441			0.000738405
	0.0637			0.067				0.00467257			0.000802085
	0.0882			0.049				0.00435665			0.00241346
	0.0587			0.078				0.00235792			0.00188381
	0.0434			0.192				0.000729404			0.00620457
	0.2042			0.037				0.00174443			0.00187367
	0.0217			0.036				0.000876278			0.00212239
	0.0276			0.048				0.00149774			0.00185922
	0.1467			0.013				0.00118612			0.00146908
	0.0925			0.032				0.00107971			0.00323926
	0.1229			0.014				0.00312524			0.000927769
	0.1019			0.036				0.000870191			0.00139463
	0.0843			0.028				0.00499587			0.00115772
	0.0482			0.034				0.00228943			0.00191236
	0.0914			0.052				0.00182889			0.00103114
	0.0398			0.034				0.00428054			0.000792444
	0.0343			0.034				0.000846341			0.000966452
	0.1433			0.198				0.00094527			0.00237618
	0.2801			0.095				0.000773288			0.000758827
	0.1181			0.063				0.00113437			0.0022189
	0.0554			0.075				0.000797004			0.00191287
	0.029			0.12				0.00129177			0.00136457
	0.0772			0.028				0.00071913			0.00140668
	0.0867			0.07				0.00250808			0.000700481
	0.0713			0.038				0.00192732			0.00203107
	0.0307			0.038				0.000849888			0.00156116
	0.0796			0.124				0.0037859			0.00224668
	0.2237			0.138				0.00107083			0.00145043
	0.5698			0.047				0.00379491			0.00108682
	0.0359			0.069				0.00151753			0.00177804
	0.0787			0.029				0.000778235			0.00238316
	0.0373			0.09				0.00175533			0.00145399
	0.0902			0.043				0.00105104			0.000732072
	0.0449			0.156				0.00248753			0.00155228
	0.036			0.118				0.000960104			0.0011879
	0.1213			0.038				0.000851288			0.00277697
	0.0652			0.158				0.00388419			0.000727117
	0.0935			0.155				0.000801437			0.000914201
	0.0487			0.037				0.00179771			0.00267994
	0.1309			0.109				0.00150904			0.00170854
	0.025			0.027				0.000885792			0.00380912
	0.0316			0.02				0.000872716			0.00160314
	0.0173			0.042				0.0012853			0.00187329
	0.0316			0				0.00169686			0.00262122
	0.0693			0.169				0.00240801			0.0012834
	0.0228			0.076				0.00402346			0.00173187
	0.0589			0.043				0.00228803			0.00136774
	0.1073			0.207				0.00183866			0.000850141
	0.1048			0.024				0.00309873			0.00316913
	0.0188			0.079				0.00485369			0.00148176
	0.0441			0.108				0.00244796			0.00843451
	0.1979			0.1				0.00104509			0.00480334
	0.0729			0.087				0.00230883			0.00136039
	0.0432			0.041				0.00279104			0.00501654
	0.0748			0.025				0.00133908			0.00121872
	0.0429			0.097				0.00103037			0.001204
	0.0492			0.049				0.00219557			0.000727244
	0.0495			0.021				0.00242565			0.00278635
	0.023			0.05				0.004961			0.00132298
	0.0537			0.015				0.00157777			0.00162052
	0.0255			0.046				0.00210603			0.00261145
	0.0283			0.03				0.00165883			0.00205136
	0.0518			0.037				0.000995241			0.000895299
	0.1033			0.039				0.00321808			0.00318955
	0.2264			0.045				0.000731312			0.00103544
	0.0262			0.055				0.00201293			0.00318054
	0.0431			0.149				0.000900373			0.00189701
	0.0432			0.258				0.0010915			0.00774341
	0.0413			0.023				0.00121199			0.00147086
	0.0452			0.053				0.00141543			0.00114795
	0.0583			0.255				0.000779115			0.00076136
	0.0606			0.081				0.00154847			0.00197235
	0.0878			0.229				0.00192656			0.00199644
	0.0241			0.036				0.00357144			0.000779249
	0.0859			0.073				0.00384031			0.0016923
	0.0832			0.169				0.001238			0.00135595
	0.0641			0.105				0.00453611			0.00156434
	0.0601			0.075				0.0016847			0.00220609
	0.0684			0.091				0.00204857			0.002338
	0.0657			0				0.00109924			0.000777975
	0.0311			0.046				0.000817172			0.0026755
	0.0617			0.102				0.00188623			0.00229602
	0.0237			0.025				0.00230718			0.00133502
	0.023			0.028				0.00123762			0.00142634
	0.0232			0.039				0.00134707			0.000784956
	0.1333			0.135				0.00130446			0.000740945
	0.0356			0.041				0.00246546			0.00105473
	0.1102			0.086				0.00111928			0.00241739
	0.0431			0.121				0.00313171			0.00193962
	0.0187			0.166				0.000766315			0.00169548
	0.0515			0.028				0.00227116			0.00144435
	0.0502			0.064				0.00167607			0.00423818
	0.03			0.018				0.00468361			0.0022435
	0.1682			0.167				0.00255463			0.00302099
	0.0994			0.081				0.000868782			0.00268957
	0.0766			0.143				0.00123165			0.00336254
	0.0202			0.164				0.00286092			0.00708071
	0.0795			0.056				0.0016913			0.0022846
	0.0785			0.22				0.00083556			0.00261678
	0.0533			0.119				0.00187697			0.001472
	0.047			0.047				0.00288693			0.000920162
	0.0916			0.036				0.00240865			0.00236375
	0.0454			0.015				0.00153732			0.000755668
	0.2485			0.258				0.00179643			0.00178159
	0.0629			0.049				0.00118104			0.00094147
	0.0189			0.068				0.00542227			0.00184032
	0.1089			0.04				0.000958078			0.00244188
	0.0177			0.097				0.00149051			0.000787869
	0.0474			0.135				0.00121352			0.00141189
	0.0435			0.037				0.00151081			0.00149129
	0.0305			0.023				0.000806645			0.00191731
	0.0671			0.083				0.00102619			0.00166757
	0.032			0.034				0.00227382			0.00104571
	0.0496			0.033				0.00140224			0.00181254
	0.1824			0.016				0.00382205			0.00149254
	0.0862			0.043				0.00184652			0.00322835
	0.0561			0.029				0.0010428			0.00126577
	0.0199			0.042				0.00212632			0.00110089
	0.0211			0.096				0.00469553			0.00107311
	0.1238			0.056				0.00577106			0.00105117
	0.0457			0.189				0.00198883			0.0008258
	0.0711			0.195				0.00215587			0.000853442
	0.0457			0.019				0.000803091			0.00234966
	0.0363			0.108				0.00121555			0.00152045
	0.0624			0.059				0.00340211			0.00087589
	0.0467			0.189				0.00159617			0.00079979
	0.0353			0.124				0.00215612			0.00264265
	0.0313			0.068				0.00306537			0.00191908
	0.0653			0.066				0.000752479			0.00146933
	0.1083			0.14				0.000738658			0.00136799
	0.0277			0.239				0.00158513			0.000771888
	0.0386			0.148				0.00272268			0.00164081
	0.0323			0.057				0.00153846			0.0010461
	0.1108			0.151				0.000878938			0.0034824
	0.014			0.278				0.00190411			0.00316393
	0.1356			0.045				0.00132652			0.00231047
	0.0479			0.036				0.0011331			0.00399505
	0.0316			0.26				0.00456427			0.000969872
	0.156			0.049				0.00255805			0.00162115
	0.057			0.026				0.00459445			0.00163446
	0.0927			0.129				0.00115632			0.00140098
	0.0563			0.143				0.00222817			0.00917241
	0.0724			0.17				0.00156204			0.00137483
	0.1645			0.064				0.00121149			0.000955544
	0.0441			0.051				0.00422081			0.0017783
	0.0212			-0.002				0.00164233			0.00117902
	0.1199			0.046				0.00113349			0.00908884
	0.0703			0.048				0.00276491			0.00245874
	0.1083			0.027				0.00207901			0.000760347
	0.0286			0.016				0.000828087			0.00341644
	0.0842			0.017				0.000671312			0.00219773
	0.0466			0.011				0.00251569			0.00150637
	0.0709			0.019				0.000986874			0.000931062
	0.0506			0.034				0.000803463			0.0076408
	0.0948			0.049				0.00320971			0.00141581
	0.1211			0.028				0.00280651			0.00203259
	0.033			0.047				0.000997268			0.000919402
	0.032			0.073				0.00234523			0.00101071
	0.0327			0.038				0.00375851			0.000951611
	0.0406			0.03				0.00128606			0.00167608
	0.0656			0.013				0.000930041			0.00208154
	0.0559			0.032				0.00167303			0.00234409
	0.0508			0.02				0.000697061			0.00115099
	0.0556			0.047				0.0012976			0.00159401
	0.0242			0.037				0.00199188			0.00275629
	0.0413			0.029				0.00134809			0.00136013
	0.0691			0.023				0.0023985			0.000779502
	0.1254			0.037				0.00175483			0.000664845
	0.024			0.019				0.00233128			0.0025233
	0.0468			0.067				0.00134479			0.000856742
	0.126			0.046				0.0016332			0.000745639
	0.2261			0.033				0.00100716			0.00178299
	0.2309			0.016				0.00356471			0.00175229
	0.0322			0.131				0.000948191			0.000801437
	0.1523			0.138				0.00153223			0.000744365
	0.2661			0.044				0.000926748			0.00340807
	0.0419			0.074				0.0012432			0.00122023
	0.1049			0.045				0.00175381			0.00153136
	0.019			0.017				0.00282934			0.00128187
	0.0115			0.02				0.00104801			0.002312
	0.0483			0.055				0.00201813			0.00168495
	0.0384			0.062				0.00122886			0.00300247
	0.0843			0.168				0.00190081			0.00106677
	0.0776			0.035				0.00181863			0.00158247
	0.1749			0.029				0.00267423			0.00106271
	0.042			0.036				0.00255133			0.00195269
	0.054			0.038				0.000947557			0.00178793
	0.0841			0.062				0.000800423			0.00349382
	0.0263			0.029				0.00104433			0.00201979
	0.0416			0.128				0.000914328			0.00242209
	0.0209			0.131				0.00107742			0.00167125
	0.0421			0.109				0.00080727			0.000932708
	0.0914			0.089				0.00181558			0.00104458
	0.0217			0.081				0.00213038			0.00563814
	0.0717			0.07				0.000700235			0.000677906
	0.0837			0.017				0.000807278			0.00249311
	0.1975			0.161				0.00205301			0.00200304
	0.0718			0.027				0.000785843			0.00307678
	0.0398			0.029				0.003265			0.00163662
	0.0221			0.153				0.00147048			0.00137915
	0.0943			0.197				0.00195763			0.00166529
	0.0501			0.081				0.00204337			0.000703022
	0.0202			0.018				0.00149406			0.00104433
	0.0577			0.035				0.0013113			0.00597171
	0.0435			0.019				0.00200583			0.000675119
	0.0786			0.019				0.00228701			0.000872724
	0.1065			0.055				0.000734605			0.000750706
	0.0445			0.031				0.00102454			0.00162039
	0.0933			0.017				0.00267004			0.00119106
	0.0686			0.036				0.00162179			0.00184082
	0.1229			0.051				0.00287754			0.00113311
	0.0367			0.03				0.0008315			0.00148734
	0.0131			0.009				0.00359718			0.00229602
	0.0795			0.027				0.00172046			0.000910267
	0.073			0.031				0.00222195			0.00108857
	0.0174			0.073				0.000913814			0.00068678
	0.0408			0.017				0.00286625			0.00249071
	0.0664			0.055				0.00206341			0.000865616
	0.0428			0.162				0.000920914			0.000911273
	0.0872			0.145				0.00136026			0.00192719
	0.0559			0.033				0.00299866			0.00862096
	0.0433			0.06				0.00269262			0.00211313
	0.1902			0.243				0.00246242			0.000927016
	0.0561			0.037				0.00193518			0.00706359
	0.0004			0.127				0.00267994			0.00436666
	0.0238			0.211				0.00313666			0.000780895
	0.0977			0.109				0.002165			0.0006878
	0.1696			0.138				0.00123901			0.00169864
	0.111			0.244				0.00114199			0.000881977
	0.0745			0.097				0.00248247			0.00140604
	0.0426			0.09				0.00165844			0.00166605
	0.1107			0.116				0.00252622			0.00115238
	0.0446			0.141				0.00192124			0.00707386
	0.0492			0.09				0.00481615			0.00270467
	0.0728			0.056				0.00079751			0.00226292
	0.0388			0.05				0.00079257			0.00362179
	0.0886			0.076				0.00074704			0.00141366
	0.0149			0.075				0.00253459			0.000721917
	0.0401			0.153				0.00125423			0.00800113
	0.0144			0.047				0.002147			0.00232975
	0.0267			0.053				0.00170029			0.000816151
	0.0572			0.293				0.00273219			0.00133832
	0.1477			0.046				0.00148087			0.00086271
	0.0346			0.123				0.00123343			0.000935629
	0.0145			0.032				0.00151081			0.00209144
	0.072			0.028				0.00260802			0.00106361
	0.0388			0.025				0.00243439			0.0036464
	0.0512			0.039				0.00461981			0.00508288
	0.0166			0.028				0.00225747			0.00866877
	0.0195			0.094				0.000806645			0.00237098
	0.0739			0.055				0.00563561			0.00326931
	0.0547			0.048				0.00218466			0.00808851
	0.0607			0.036				0.00294324			0.00239888
	0.0237			0.175				0.00371133			0.0020331
	0.0216			0.059				0.00431187			0.000730671
	0.0566			0.133				0.00256199			0.00109898
	0.0485			0.074				0.00362318			0.000885904
	0.0592			0.026				0.00117762			0.00113323
	0.0247			0.079				0.0016786			0.00112917
	0.0256			0.073				0.00190526			0.000844687
	0.076			0.11				0.00135493			0.0016365
	0.0148			0.139				0.0012347			0.00160529
	0.0612			0.022				0.00334935			0.00255437
	0.1122			0.048				0.000881858			0.00139615
	0.0345			0.144				0.00101478			0.000942223
	0.0574			0.058				0.0034139			0.00131498
	0.0753			0.017				0.00227243			0.0015604
	0.0592			0.115				0.00314274			0.00134429
	0.0318			0.23				0.000858508			0.000826932
	0.0288			0.039				0.000816025			0.00076808
	0.013			0.103				0.00255133			0.000715323
	0.1215			0.131				0.0154077			0.00105713
	0.1366			0.043				0.00211706			0.000952497
	0.0408			0.041				0.00371234			0.000877157
	0.0705			0.061				0.00164208			0.000919141
	0.0465			0.041				0.00160467			0.00272141
	0.0544			0.215				0.00189955			0.00106271
	0.1422			0.173				0.00119589			0.00080017
	0.0519			0.038				0.00407165			0.0018223
	0.0285			0.037				0.0026703			0.00203513
	0.0409			0.042				0.00147555			0.00150777
	0.0175			0.006				0.00104407			0.00133438
	0.0323			0.043				0.00123216			0.00197565
	0.0471			0.023				0.00182065			0.000790536
	0.0515			0.032				0.0025413			0.000725344
	0.0238			0.035				0.00311865			0.00111358
	0.1459			0.054				0.00237934			0.00115886
	0.0507			0.045				0.000822879			0.0011567
	0.0757			0.027				0.00179415			0.00145704
	0.056			0.045				0.00172567			0.00158171
	0.058			0.117				0.00208294			0.000784956
	0.0242			0.025				0.00256377			0.00109658
	0.0891			0.149				0.00300451			0.00107388
	0.0365			0.003				0.00369497			0.00162343
	0.0935			0.047				0.00146984			0.00268146
	0.0676			0.003				0.00247689			0.000989914
	0.0642			0.137				0.0034498			0.00142671
	0.0597			0.034				0.00133439			0.00132817
	0.0403			0.277				0.00177867			0.00117331
	0.0256			0.014				0.000856608			0.00210539
	0.1692			0.05				0.00525232			0.000979386
	0.0287			0.176				0.00100133			0.0007677
	0.0348			0.153				0.00313247			0.000761993
	0.1448			0.059				0.00214776			0.000679933
	0.0268			0.052				0.00203728			0.000884891
	0.0101			0.066				0.000995874			0.00777663
	0.0497			0.027				0.000862062			0.00124674
	0.029			0.262				0.00274513			0.000718869
	0.1195			0.072				0.00138334			0.000920035
	0.1408			0.039				0.001264			0.00102454
	0.0302			0.058				0.00437377			0.00219886
	0.1125			0.06				0.0031511			0.00332093
	0.0245			0.119				0.000863336			0.00140136
	0.0202			0.139				0.00140288			0.00602003
	0.0223			0.08				0.00181001			0.00312118
	0.0381			0.044				0.00357282			0.000690721
	0.0116			0.031				0.00253079			0.00207508
	0.0592			0.046				0.00256338			0.00241613
	0.0459			0.057				0.00144269			0.00195282
	0.0461			0.042				0.00110165			0.000706576
	0.024			0.203				0.000785083			0.00152197
	0.0431			0.023				0.00317039			0.00241689
	0.0415			0.029				0.00121073			0.00240941
	0.0469			0.062				0.0011723			0.00164043
	0.0543			0				0.00379592			0.00131168
	0.0562			0.28				0.00254904			0.000873357
	0.2814			0.038				0.00104534			0.00226077
	0.0715			0.069				0.00181584			0.00142901
	0.079			0.078				0.0011633			0.000703022
	0.105			0.067				0.00533222			0.00248081
	0.0202			0.023				0.00179871			0.0022354
	0.1854			0.038				0.00459191			0.00116354
	0.0306			0.129				0.00218111			0.00141505
	0.0528			0.017				0.000965059			0.000970125
	0.0297			0.058				0.00287259			0.000797637
	0.0971			0.163				0.00128594			0.00116138
	0.0283			0.02				0.00343077			0.00156471
	0.0633			0.05				0.00213329			0.00151031
	0.0165			0.082				0.000720404			0.00199771
	0.0321			0.072				0.00160238			0.00294894
	0.0805			0.076				0.00332589			0.000811085
	0.0555			0.07				0.00258495			0.000855848
	0.0507			0.032				0.00156408			0.000659779
	0.0423			0.11				0.00241562			0.00309949
	0.0272			0.066				0.00210805			0.00201318
	0.068			0.119				0.00233661			0.00142291
	0.0361			0.062				0.000850402			0.00200254
	0.0287			0.29				0.00321719			0.000964932
	0.0232			0.083				0.000967592			0.00154328
	0.0605			0.059				0.0034318			0.00109887
	0.0387			0.078				0.0013472			0.00164372
	0.0521			0.061				0.00308693			0.00152729
	0.0279			0.036				0.00203867			0.00223501
	0.0503			0.027				0.00142609			0.00131067
	0.0703			0.131				0.00188763			0.000871703
	0.0836			0.089				0.00127693			0.00219785
	0.0612			0.036				0.00314375			0.00128276
	0.0269			0.076				0.00160466			0.000902146
	0.1216			0.03				0.0017627			0.00574785
	0.0652			0.053				0.000789396			0.000781782
	0.0649			0.021				0.00105675			0.00435994
	0.0235			0.017				0.00272407			0.00209422
	0.0425			0.066				0.00221561			0.000884511
	0.0489			0.039				0.0010111			0.0018549
	0.0949			0.06				0.00354733			0.000921808
	0.008			0.141				0.00142279			0.0020969
	0.0275			0.021				0.00754669			0.0021097
	0.1128			0.063				0.00181393			0.00223184
	0.0725			0.085				0.00287995			0.00142178
	0.0256			0.073				0.00663757			0.00146312
	0.023			0.258				0.00459889			0.00231086
	0.0435			0.18				0.00362889			0.00470441
	0.023			0.07				0.00534643			0.00432481
	0.0225			0.053				0.00656401			0.00201115
	0.0239			0.103				0.00289162			0.00172465
	0.0415			0.142				0.00217438			0.000972025
	0.0488			0.062				0.00220547			0.0010409
	0.0522			0.094				0.00189548			0.000966698
	0.0153			0.096				0.00353807			0.00181621
	0.0564			0.124				0.00274678			0.00110837
	0.0708			0.049				0.00226773			0.00230668
	0.0547			0.029				0.00110736			0.00251176
	0.0502			0.18				0.00123102			0.00187621
	0.0818			0.021				0.0028197			0.00129481
	0.0321			0.038				0.00186442			0.0018549
	0.0119			0.131				0.00117724			0.00161176
	0.0469			0.1				0.00143572			0.000934623
	0.0496			0.081				0.000667632			0.00201978
	0.1275			0.107				0.0028613			0.00100691
	0.1019			0.123				0.000870563			0.00263174
	0.0383			0.064				0.0011695			0.00168394
	0.052			0.163				0.00297976			0.00167543
	0.0691			0.141				0.00280436			0.000793204
	0.0346			0.132				0.00372959			0.000974566
	0.0354			0.162				0.00112385			0.00277874
	0.0969			0.093				0.000715956			0.00272319
	0.0364			0.114				0.00123622			0.00121517
	0.0237			0.108				0.000860922			0.00164778
	0.0967			0.196				0.0023446			0.00593544
	0.0623			0.023				0.000963785			0.00130901
	0.0245			0.074				0.000892125			0.000702642
	0.0355			0.111				0.00260194			0.000652663
	0.0513			0.06				0.00138474			0.00105029
	0.143			0.015				0.0017878			0.0025233
	0.016			0.018				0.00304787			0.00340084
	0.0952			0.055				0.00276555			0.00123698
	0.1755			0.04				0.00111649			0.00264949
	0.1116			0.137				0.003923			0.000874363
	0.0208			0.041				0.00114097			0.00229919
	0.039			0.187				0.00182699			0.000817299
	0.0385			0.034				0.00200228			0.00240953
	0.2272			0.121				0.00173352			0.00379948
	0.1215			0.039				0.00339679			0.00454131
	0.0385			0.019				0.00377233			0.00336394
	0.0434			0.055				0.00135163			0.000880085
	0.0434			0.034				0.000772648			0.000731178
	0.06			0.017				0.00281894			0.00285408
	0.0379			0.026				0.00317673			0.000993848
	0.0368			0.017				0.00132526			0.00109315
	0.0205			0.058				0.00182877			0.00139793
	0.036			0.065				0.000960104			0.00173695
	0.0245			0.035				0.00170017			0.00246305
	0.0844			0.124				0.0023205			0.00198401
	0.113			0.091				0.00168038			0.00258292
	0.039			0.083				0.00100729			0.00180595
	0.0696			0.115				0.000937276			0.00204642
	0.2475			0.021				0.00306652			0.00370397
	0.0245			0.32				0.000706322			0.00123331
	0.0741			0.135				0.00374976			0.00138867
	0.0481			0.146				0.00142089			0.00206848
	0.039			0.099				0.00104559			0.00163396
	0.0843			0.156				0.000895798			0.00116304
	0.035			0.102				0.00210426			0.000884131
	0.0489			0.142				0.00210781			0.0011326
	0.022			0.026				0.00198364			0.00391603
	0.0125			0.072				0.00196499			0.00285636
	0.0496			0.073				0.00205237			0.00167607
	0.0496			0.038				0.00264848			0.00146744
	0.0959			0.065				0.0021248			0.00101909
	0.0235			0.055				0.00244708			0.00214534
	0.1098			0.045				0.00116988			0.00256122
	0.0372			0.042				0.00105257			0.00125308
	0.0685			0.048				0.00079231			0.00151233
	0.0453			0.038				0.00141328			0.00193163
	0.0403			0.095				0.00458887			0.0056247
	0.0443			0.085				0.00118422			0.00219543
	0.0485			0.019				0.00101148			0.00328416
	0.0642			0.061				0.000988014			0.00212176
	0.0481			0				0.00137118			0.000939682
	0.0288			0.033				0.000852183			0.00147758
	0.0832			0.078				0.00240066			0.00136952
	0.1427			0.025				0.00157321			0.00186911
	0.0507			0.03				0.00303595			0.00126641
	0.0235			0.15				0.00184881			0.00310227
	0.0611			0.137				0.00221586			0.0017547
	0.0151			0.106				0.0020856			0.00185376
	0.0321			0.064				0.00143814			0.00144181
	0.1011			0.087				0.00262755			0.000955038
	0.0467			0.015				0.00155685			0.00276656
	0.0684			0.072				0.00106499			0.000795744
	0.0531			0.052				0.00283378			0.00181635
	0.0395			0.106				0.00154163			0.00126818
	0.0141			0.154				0.00168685			0.00068374
	0.0411			0.063				0.00194571			0.00123788
	0.0391			0.235				0.00201077			0.00762178
	0.0762			0.099				0.00202867			0.00592896
	0.065			0.058				0.000657745			0.00075274
	0.033			0.143				0.00357524			0.00363219
	0.0637			0.176				0.00325917			0.000961117
	0.0262			0.077				0.00178578			0.0019428
	0.0313			0.048				0.000890605			0.000863977
	0.0263			0.071				0.0043309			0.00161621
	0.0714			0.123				0.00442132			0.00128048
	0.0661			0.03				0.000923201			0.00087399
	0.0763			0.077				0.00154048			0.00166478
	0.0349			0.027				0.00225733			0.000942729
	0.1014			0.045				0.00369611			0.00142317
	0.0226			0.048				0.00139286			0.00189815
	0.1215			0.095				0.00090988			0.00143091
	0.121			0.052				0.00298522			0.00132348
	0.136			0.011				0.00185997			0.00120565
	0.009			0.027				0.00192288			0.000825413
	0.1778			0.05				0.000952624			0.000724457
	0.0804			0.096				0.00230718			0.00325892
	0.0857			0.07				0.00625403			0.00110342
	0.0224			0.077				0.00307387			0.00202575
	0.03			0.073				0.0018672			0.00242247
	0.0478			0.045				0.00334249			0.000943244
[truncated: 6,052 more rows]

## Sheet: Fig. 4f
		LRD Frequency (Hz)		normal EPSP frequency (Hz)		LRD amplitude (mV)		normal EPSP amplitude (mV)		normal IPSP frequency (Hz)		normal IPSP amplitude (mV)
		ctrl	NE	ctrl	NE	ctrl	NE	ctrl	NE	ctrl	NE	ctrl	NE
22072020 A	nFS	0.15	0.25	5.7	5	6.1	4.8	1.04	1.18	0.52	0.1	0.81	0.67
22072020 E	FS	0.15	0.34	14.3	10.6	18.3	14	1.54	1.57	-	-	-	-
10032021 C	FS	0	0.11	2.5	3	-	-	1.32	1.48	0.18	0.77	0.43	0.47
26032021 A	nFS	0.38	0.86	26.1	24	13.9	13.67	2.22	2.12	-	-	-	-
26032021 B	FS	0.48	0.72	25.2	21.2	11.6	8.1	1.47	1.41	-	-	-	-
27042021 D	FS	0.24	0.55	11.9	14.9	11.7	10.8	1.37	2.44	-	-	-	-
27042021 E	FS	0	0.32	4.8	4.1	-	-	0.78	0.82	0.09	0.01	1.1	1.06
01072021 B	nFS	0	0.17	13.9	10.6	-	-	1.59	1.88	2.18	0.96	0.7	0.56
01072021 C	FS	0	0.5	10.01	10.02	-	-	1.28	1.85	-	-	-	-
01072021 D	nFS	0	0.26	3.16	7.92	-	-	2.53	4.06	-	-	-	-
02082021 G	FS	0	0.25	1.14	12.38	-	-	2.12	3.99	0.41	0.98	0.89	0.86
27082021 C	nFS	0.21	0.34	3.15	6.58	9.92	8.72	3.01	2.51	0.24	0.21	0.82	0.85
		0.134167	0.389167	10.155	10.8583	11.92	10.015	1.68917	2.10917	0.603333	0.505	0.791667	0.745
		0.166649	0.225689	8.53474	6.52148	4.06566	3.53259	0.650363	1.01953	0.788027	0.446979	0.221397	0.218609

## Sheet: Fig. 4h
		LRD frequency			LRD amplitude
	ctrl	Ach 30	ACh30 & tropicamide	ctrl	Ach 30	ACh30 & tropicamide
27042021 D	0.26	0.06	0.21	8.99	5.1	5.35
27042021 E	0.34	0.03	0.2	9.96	4.39	8.4
02082021 A	0.5	0.15	0.5	11.72	6.65	8.12
27082021 C	0.25	0.11	0.21	13.08	12.61	13.87
16122021 H	0.14	0.02	0.26	4.65	3.43	5.08
	0.298	0.074	0.276	9.68	6.436	8.164
	0.133492	0.0550454	0.127397	3.22401	3.64593	3.53715

## Sheet: Fig. 4l
globeal firing rate (Hz)	aCSF	aCSF + 15/30µM ACH			Degree Centrality	aCSF	aCSF + 15/30µM ACH		Negative LFP amplitude (µV)	aCSF	aCSF + 15/30µM ACH			number_channels_with_lfp_down	aCSF	aCSF + 15/30µM ACH
2203CE029	0.3755	91.48			ID131	0.26715	0.1176		2203CE029	-47.18	-10.94			2203CE029	1.125	0.6111
2203CE030	6.906	145.7			ID2203011CE	0.0698	0.14665		2203CE030	-37.9	-30.59			2203CE030	10	1.49
2203CE039	50.74	165			ID2203029CE	0.1132	0.1126		2203CE039	-89.58	-65.65			2203CE039	17.05	9.962
2203CE040	15.01	35.5			ID2203030CE	0.09785	0.08885		2203CE040	-65.54	-69.89			2203CE040	3.206	1.124
2203CE047	3.187	17.02			ID2203039CE	0.124	0.0102		2203CE047	-31.93	-15.22			2203CE047	0.4138	3.463
2203CE048	17.95	20.46			ID2203040CE	0.213	0.17725		2203CE048	-20.53	-17.91			2203CE048	6.788	5.914
2203CE011	2.004	7.632			ID2203046CE	0.66085	0.4056		2203CE011	-21.96	-26.79			2203CE011	31.75	4.786
2203CE046	9.003	141.5			ID2203047CE	0.13015	0.0711		2203CE046	-192.7	-81.1			2203CE046	11.62	8.326
ID131	1.118	1.791			ID2203048CE	0.07235	0.0475		ID131	-48.03	-60.4			ID131	2.6	0.7692
ID132	12.41	1.46			ID2205CT026	0.0482	0.04715		ID132	-25.91	-29.2			ID132	10.4	0.7273
ID135	0.3103	3.823							ID135	-112.8	-164.1			ID135	0.2857	0.4545
ID2205CT026	7.117	7.794							ID2205CT026	-59.7	-83.23			ID2205CT026	0.5867	0.4651
